# Supplementary material for: Direct synthesis of indazole derivatives via Rh(iii)-catalyzed C–H activation of phthalazinones and allenes
Source: Royal Society of Chemistry journal article supplement (doi:10.1039/d1ob01458g), 2021-01-01
Supplement: d1ob01458g1.pdf [file d1ob01458g1.pdf]

# Supporting Information

## Direct synthesis of indazole derivatives via Rh(III)-catalyzed C–H activation of phthalazinones and allenes

Chuanliu Yin, Tianshuo Zhong, Xiangyun Zheng, Lianghao Li and Jian Zhou  
Chuanming Yu\*

*E-mail address:* ycm@zjut.edu.cn (C. Yu)

College of pharmaceutical sciences, Zhejiang University of Technology, Hangzhou 310014, P. R. of China

### Table of Contents

|                                                            |     |
|------------------------------------------------------------|-----|
| 1. General information .....                               | S2  |
| 2. General procedure for the synthesis of products 3 ..... | S2  |
| 3. Gram scale synthesis and derivatization .....           | S2  |
| 3.1 Gram scale synthesis .....                             | S2  |
| 3.2 Produce for the synthesis of compound 5 .....          | S3  |
| 4. Isotope labeling experiments.....                       | S3  |
| 4.1 H/D exchange experiment.....                           | S3  |
| 4.2 Kinetic isotope effect .....                           | S5  |
| 5. Competition experiments .....                           | S7  |
| 6. Radical inhibition studies .....                        | S8  |
| 8. Analytical data and copies of NMR spectra .....         | S9  |
| 8.1 Analytical data for products .....                     | S9  |
| 8.2 Copies of NMR spectra.....                             | S25 |
| 9. References.....                                         | S65 |

---

## 1. General information

Unless otherwise noted, all reactions were carried out without exclusion of air or moisture. Commercial solvents and reagents were used without further purification. Analytical thin layer chromatography (TLC) was performed using silica gel GF254 plates. Column chromatography was performed using silica gel (200-300 mesh) eluting with petroleum ether and ethyl acetate. NMR spectra were recorded on 400 MHz or 600 MHz spectrometers in the solvent indicated. Chemical shifts are reported downfield from TMS (= 0) for  $^1\text{H}$  NMR. For  $^{13}\text{C}$  NMR, chemical shifts are reported in the scale relative to  $\text{CDCl}_3$  (= 77.00).  $^{19}\text{F}$  NMR were recorded on Bruker Ascend<sup>TM</sup> (376 MHz). HR-MS spectra were recorded on an electrospray ionization quadrupole time-of-flight (ESI-Q-TOF) mass spectrometer. Melting points were determined using a Büchi B-540 capillary melting point apparatus. **1a-1w**,<sup>1</sup> **2a-2n**,<sup>2</sup> **2o**,<sup>3</sup> **2p**<sup>4</sup> and **2q**<sup>5</sup> are known compounds and prepared according to the corresponding literature.

## 2. General procedure for the synthesis of products 3

A mixture of 2-phenyl-2,3-dihydrophthalazine-1,4-dione **1a** (47.6 mg, 0.20 mmol), buta-2,3-dien-1-ylbenzene **2a** (39.1 mg, 0.30 mmol),  $[\text{Rh}^*\text{CpCl}_2]_2$  (3.1 mg, 2.5 mol %), NaOAc (16.4 mg, 0.20 mmol) and AgOAc (33.4 mg, 0.20 mmol) in MeCN (1.0 mL) was stirred at 120 °C under open air for 12 hours. The resulting mixture was cooled to room temperature, solvent was removed under vacuo and the crude reaction mixture was purified by silica gel (200-300 mesh) column chromatography using hexane/ethyl acetate (6:1) as the eluant to afford **3a** as a yellow solid.

## 3. Gram scale synthesis and derivatization

### 3.1 Gram scale synthesis

To a 50 mL oven-dried sealed tube, 2-phenyl-2,3-dihydrophthalazine-1,4-dione **1a** (1.2 g, 5.0 mmol), buta-2,3-dien-1-ylbenzene **2a** (1.0 g, 7.5 mmol),  $[\text{Rh}^*\text{CpCl}_2]_2$  (77.5 mg, 2.5 mol %), NaOAc (0.41 g, 5.0 mmol) and AgOAc (0.84 g, 5.0 mmol) in MeCN (20.0 mL) were added sequentially under open air. The tube was sealed and placed in a preheated oil bath at 120 °C for 12 h. The reaction mixture was cooled to room temperature and concentrated under vacuo. The resulting mixture was purified by chromatography on silica gel with hexane/ethyl acetate (6:1) to give the corresponding product **3a** in 77 % yield (1.41 g).

### 3.2 Produce for the synthesis of compound 5

To a 10-mL round-bottomed flask containing **3a** (109.9 mg, 0.3 mmol, 1.0 equiv) and CH<sub>2</sub>Cl<sub>2</sub>/CH<sub>3</sub>CN/H<sub>2</sub>O (1:1:2) (4.0 mL) were added at room temperature. Then RuCl<sub>3</sub> (1.9 mg, 3.0 mol %) and NaIO<sub>4</sub> (321.0 mg, 5.0 equiv) were added and the resulting suspension was stirred at room temperature. After reaction, H<sub>2</sub>O and EtOAc were added and the organic phase was washed with H<sub>2</sub>O and brine, dried over anhydrous Na<sub>2</sub>SO<sub>4</sub> and concentrated by rotary evaporation. Purification by silica column chromatography to afford corresponding product **5** (34.9 mg, 44%).

## 4. Isotope labeling experiments

### 4.1 H/D exchange experiment

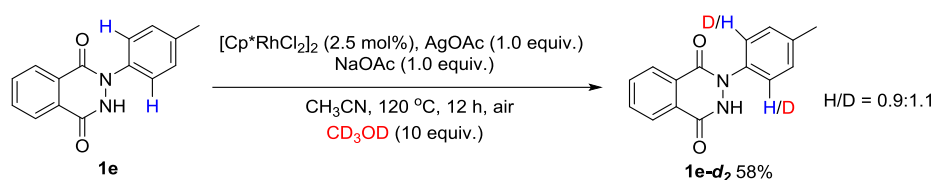

Compound **1e** (50.5 mg, 0.20 mmol), [Cp<sup>\*</sup>RhCl<sub>2</sub>]<sub>2</sub> (3.1 mg, 2.5 mol %), AgOAc (33.4 mg, 0.20 mmol), NaOAc (16.4 mg, 0.20 mmol) and CD<sub>3</sub>OD (72.1 mg, 2.0 mmol) were dissolved in MeCN (1.0 mL). The mixture was stirred at 120 °C under air for 12 hours. The resulting mixture was cooled to room temperature, solvent was removed under vacuo and the crude reaction mixture was purified by silica gel column chromatography (58% recovered) using hexane/ethyl acetate (2:1) as the eluant. The deuterated ratio was calculated from <sup>1</sup>H NMR analysis. (~55% D-incorporation was observed)

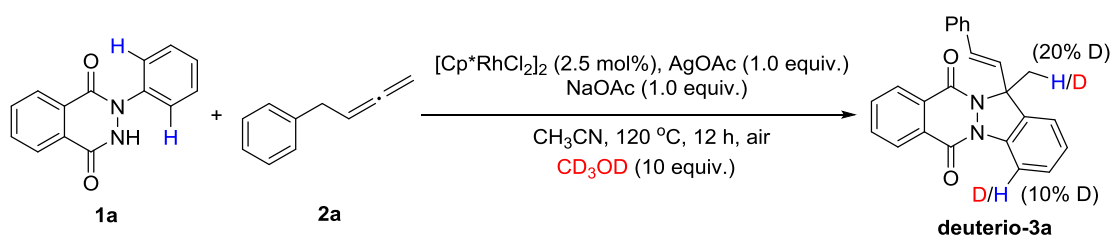

A mixture of 2-phenyl-2,3-dihydrophthalazine-1,4-dione **1a** (47.6 mg, 0.20 mmol), buta-2,3-dien-1-ylbenzene **2a** (39.1 mg, 0.30 mmol), [Cp<sup>\*</sup>RhCl<sub>2</sub>]<sub>2</sub> (3.1 mg, 2.5 mol %), AgOAc (33.4 mg, 0.20 mmol), NaOAc (16.4 mg, 0.20 mmol) and CD<sub>3</sub>OD (72.1 mg, 2.0 mmol) were dissolved in MeCN (1.0 mL). The mixture was stirred at 120 °C under open air for 12 hours. The resulting mixture was cooled to room temperature, solvent was removed under vacuo and the crude reaction mixture was purified by silica gel (200-300 mesh) column chromatography using hexane/ethyl acetate (6:1) as the eluant to afford **3a** as a yellow solid. The deuterated ratio was

calculated from  $^1\text{H}$  NMR analysis.

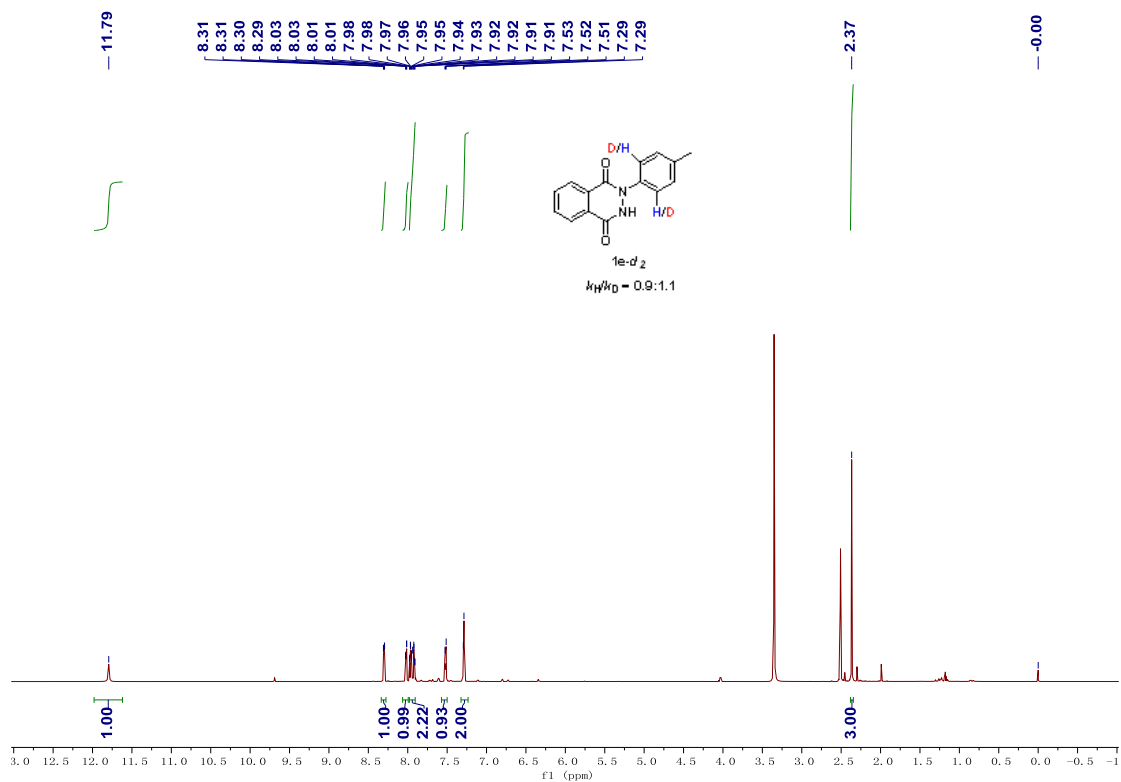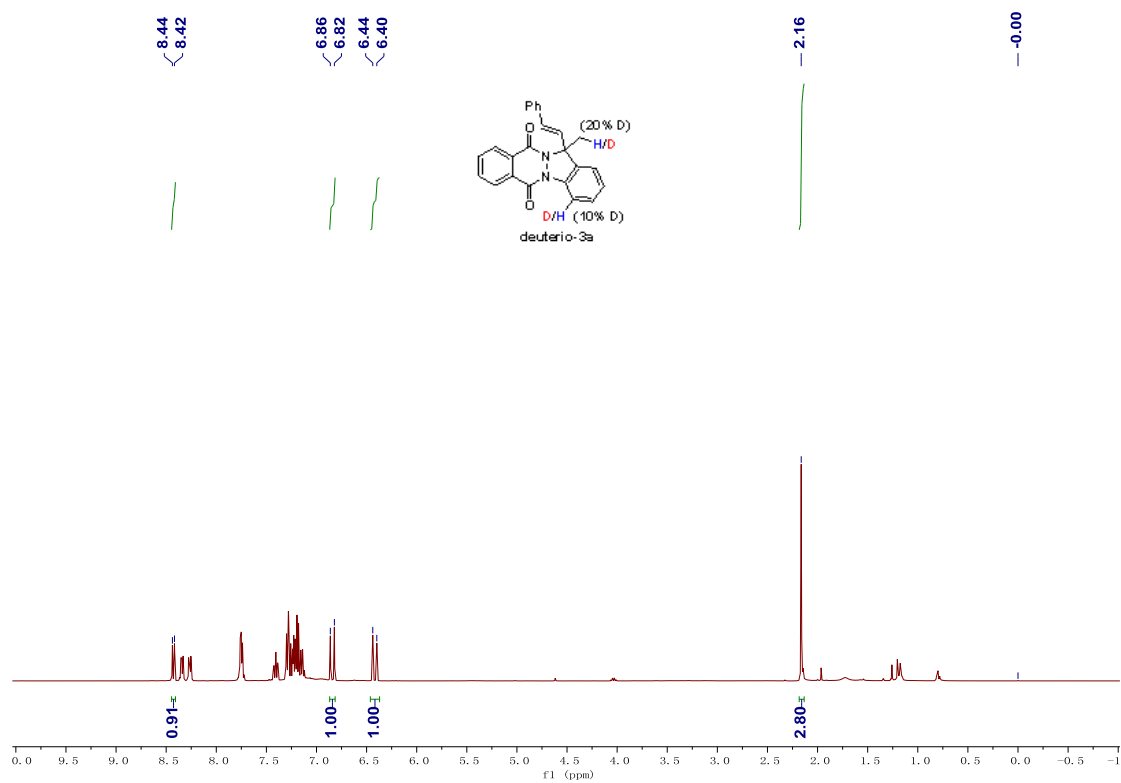

## 4.2 Kinetic isotope effect

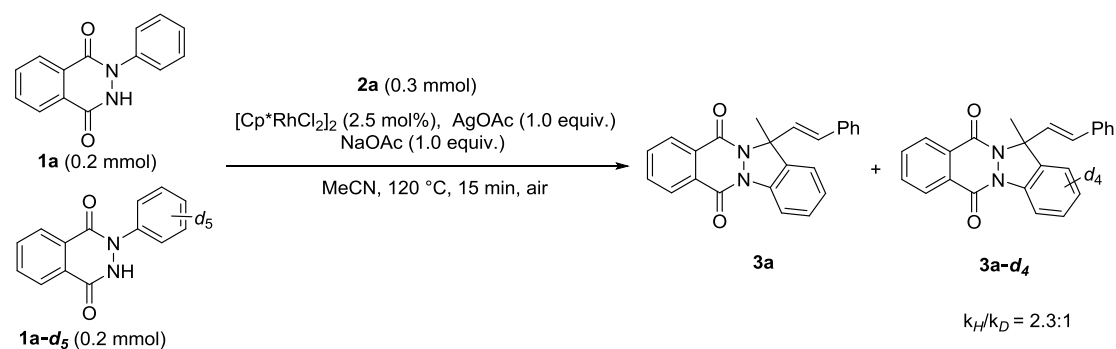

2-phenyl-2,3-dihydrophthalazine-1,4-dione **1a** (47.6 mg, 0.20 mmol) and [ $D_5$ ]-2-phenyl-2,3-dihydrophthalazine-1,4-dione **1a-d<sub>5</sub>** (48.7 mg, 0.20 mmol), buta-2,3-dien-1-ylbenzene **2a** (39.1 mg, 0.30 mmol),  $[\text{Cp}^*\text{RhCl}_2]_2$  (3.1 mg, 2.5 mol %), AgOAc (33.4 mg, 0.20 mmol) and NaOAc (16.4 mg, 0.20 mmol) were dissolved in MeCN (1.0 mL). The mixture was stirred at 120 °C under air for 15 minutes. The resulting mixture was cooled to room temperature and solvent was removed under vacuo. Purification was performed by column chromatography on silica gel using hexane/ethyl acetate (6:1) as the eluant to provide a mixture of **3a** and **3a-d<sub>4</sub>**. The ratio of **3a** and **3a-d<sub>4</sub>** was determined to be 2.3:1 by  $^1\text{H}$  NMR integration method ( $k_H/k_D = 2.3$ ).

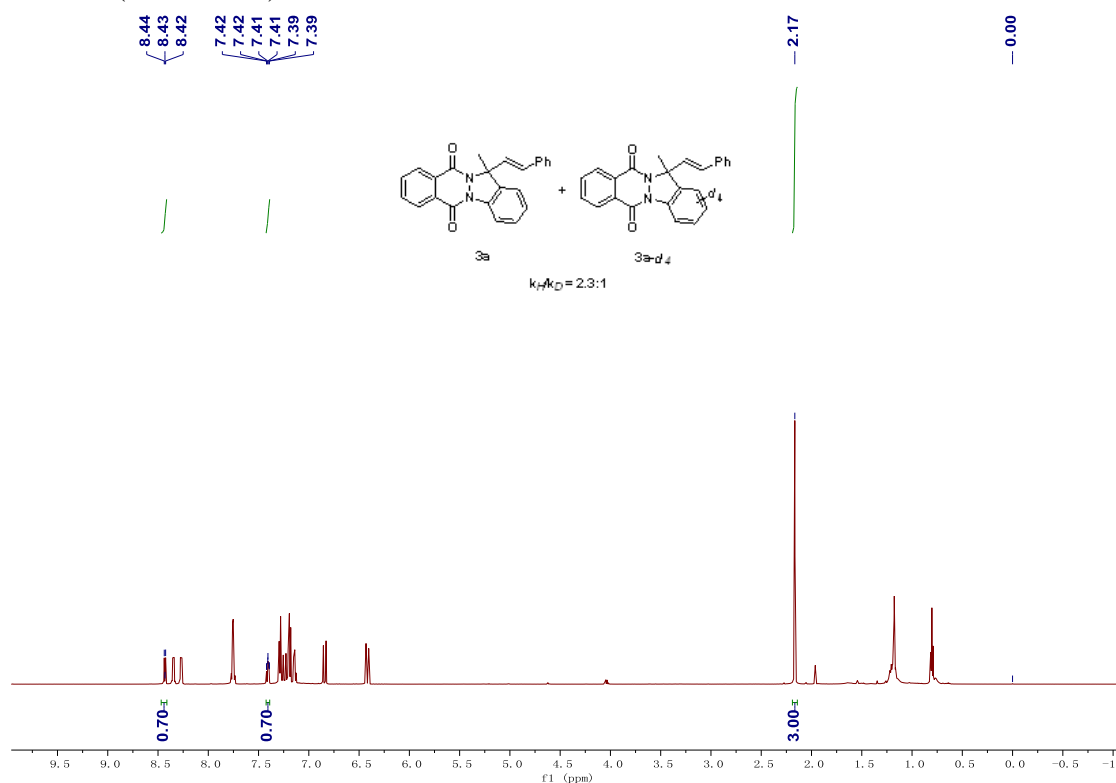

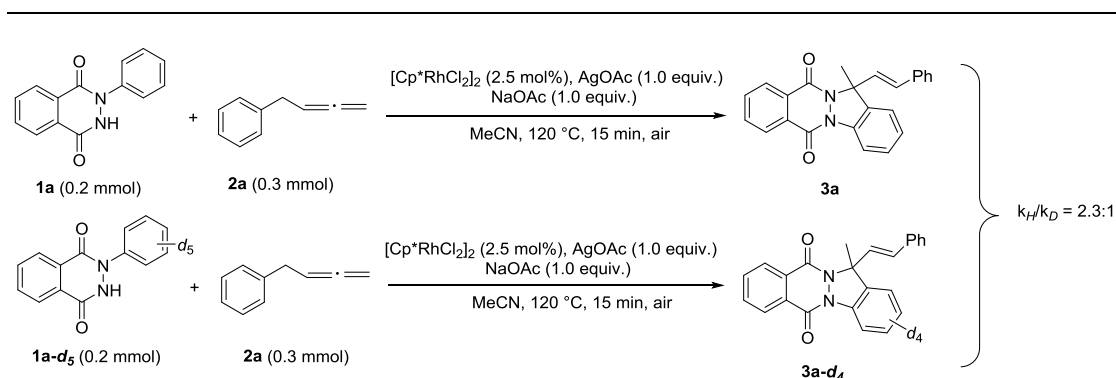

In a round bottom flask, a mixture of **1a** (47.6 mg, 0.20 mmol), allene **2a** (39.1 mg, 0.30 mmol),  $[\text{Cp}^*\text{RhCl}_2]_2$  (3.1 mg, 2.5 mol %), AgOAc (33.4 mg, 0.20 mmol) and NaOAc (16.4 mg, 0.20 mmol) in MeCN (1.0 mL) was stirred at 120 °C under open air for 15 minutes. At the same time, in another round bottom flask, a solution of **1a-d<sub>5</sub>** (48.7 mg, 0.20 mmol), allene **2a** (39.1 mg, 0.30 mmol),  $[\text{Cp}^*\text{RhCl}_2]_2$  (3.1 mg, 2.5 mol %), AgOAc (33.4 mg, 0.20 mmol) and NaOAc (16.4 mg, 0.20 mmol) in MeCN (1.0 mL) was stirred at 120 °C under open air for 15 minutes. These two mixtures were rapidly combined, and all the volatiles were rapidly removed under a reduced pressure. The residue was purified by silica gel chromatography using hexane/ethyl acetate (6:1) as the eluant to provide a mixture of **3a** and **3a-d<sub>4</sub>**. The ratio of **3a** and **3a-d<sub>4</sub>** was determined to be 2.3:1 by <sup>1</sup>H NMR integration method ( $k_H/k_D = 2.3$ ).

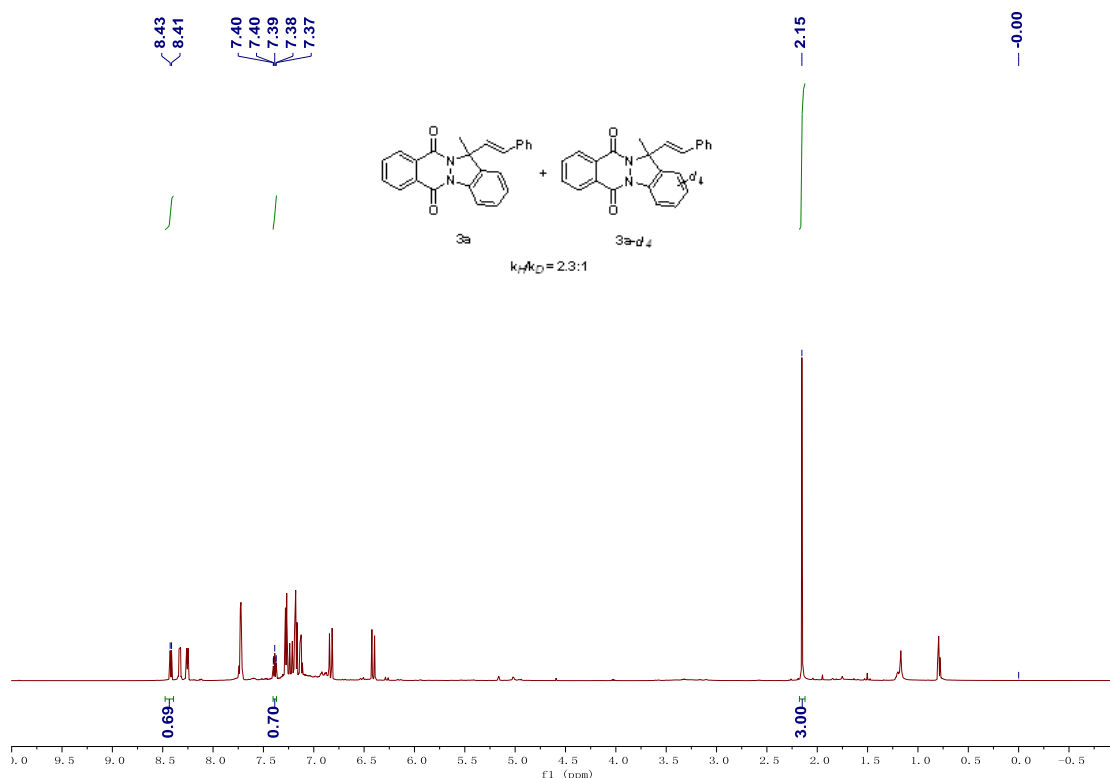

## 5. Competition experiments

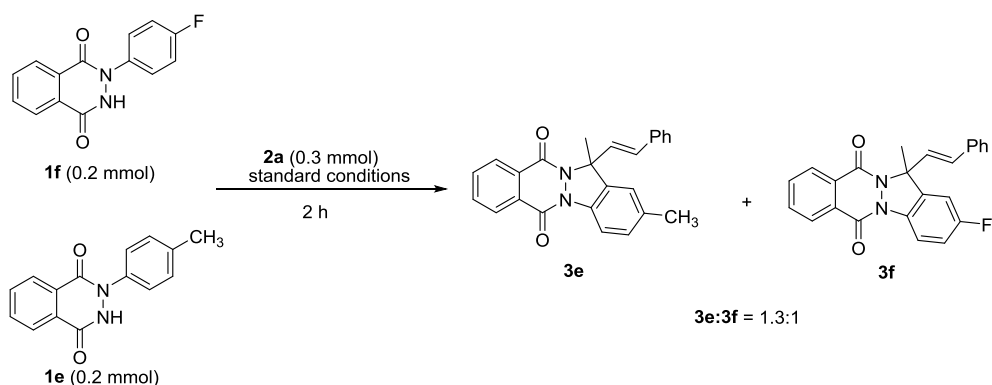

A solution of N-aryl phthalazinones **1e** (50.5 mg, 0.20 mmol) and **1f** (51.2 mg, 0.20 mmol), allene **2a** (39.1 mg, 0.30 mmol), [Cp\**Rh*Cl<sub>2</sub>]<sub>2</sub> (3.1 mg, 2.5 mol %), AgOAc (33.4 mg, 0.20 mmol) and NaOAc (16.4 mg, 0.20 mmol) in MeCN (1.0 mL) was stirred at 120 °C under open air for 2 hours. The solvent was removed under vacuo and the crude reaction mixture was directly loaded on silica gel column chromatography and purified using hexane/ethyl acetate (6:1) as the eluant to afford a mixture of compounds **3e** and **3f**. The ratio of **3e** and **3f** was determined to be 1.3:1 by <sup>1</sup>H NMR.

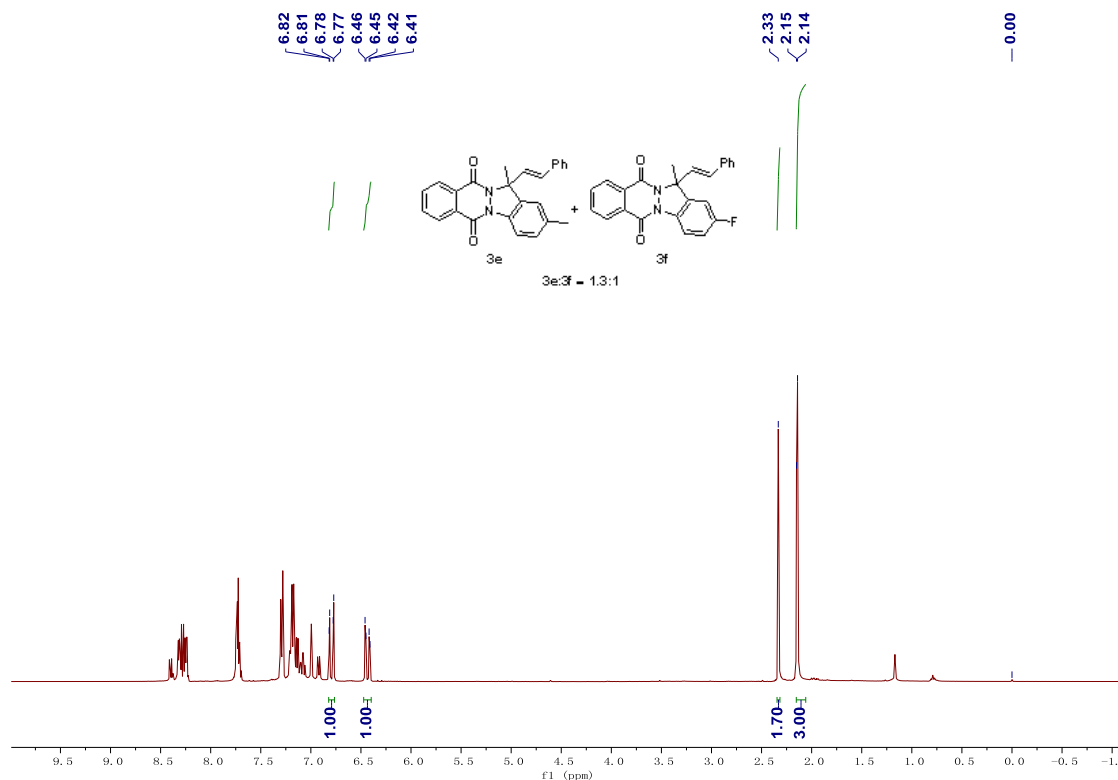

## 6. Radical inhibition studies

A mixture of **1a** (47.6 mg, 0.20 mmol), **2a** (39.1 mg, 0.30 mmol), [Cp\*RhCl<sub>2</sub>]<sub>2</sub> (3.1 mg, 2.5 mol %), AgOAc (33.4 mg, 0.20 mmol), NaOAc (16.4 mg, 0.20 mmol) and 2,2,6,6-tetramethylpiperidinoxy (93.8 mg, 6.00 mmol) or 2,6-di-tert-butyl-4-methylphenol (132.2 mg, 6.00 mmol) were dissolved in MeCN (1.0 mL). The mixture was stirred at 120 °C under open air for 12 hours. The resulting mixture was cooled to room temperature, solvent was removed under vacuo and the crude reaction mixture was purified by silica gel (200-300 mesh) column chromatography to afford **3a**.

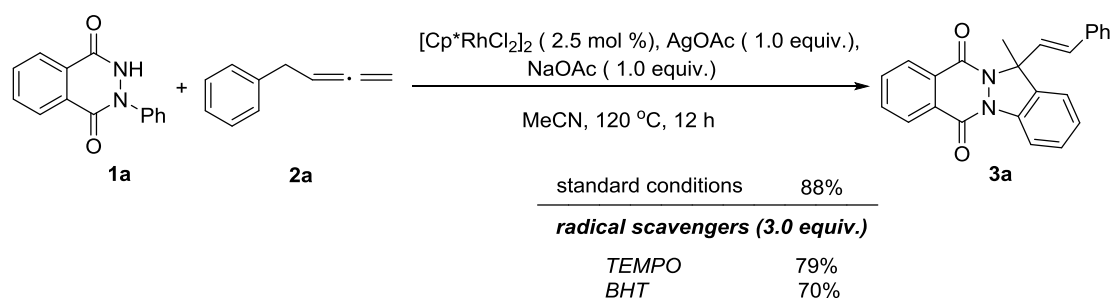

## 7. Intermediate capture experiments

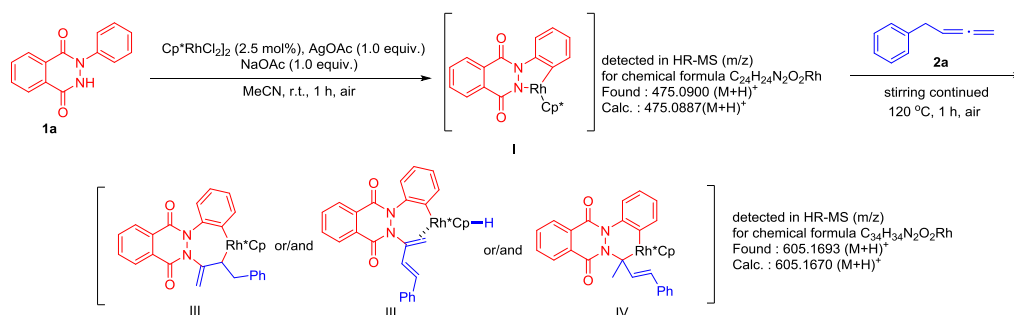

In an oven-dried 10 mL pressure tube, a mixture of **1a** (0.20 mmol), [Cp\*RhCl<sub>2</sub>]<sub>2</sub> (2.5 mol %), AgOAc (0.20 mmol) and NaOAc (0.20 mmol) in MeCN (1.0 mL) was stirred at room temperature under open air for 1 hours, and the reaction mixture characterized by HR-MS. To the reaction mixture was added **2a** (0.30 mmol), further stirring the reaction mixture for another 1 h at 120 °C and the reaction mixture characterized by HR-MS.

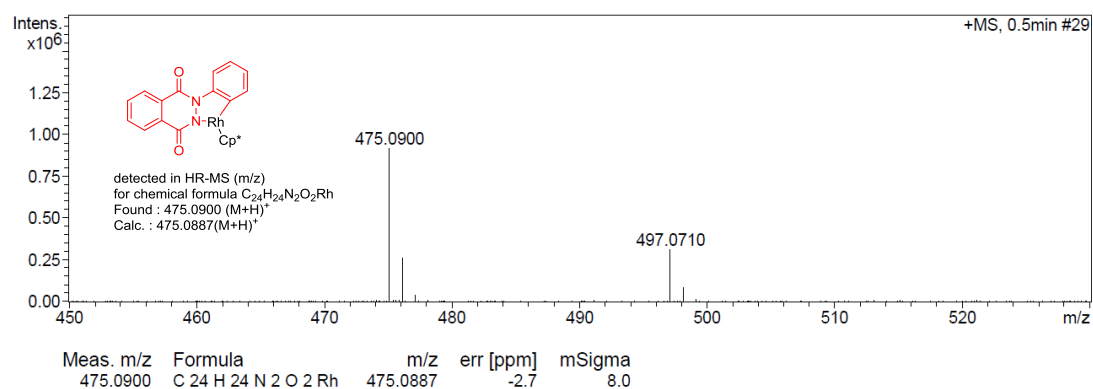



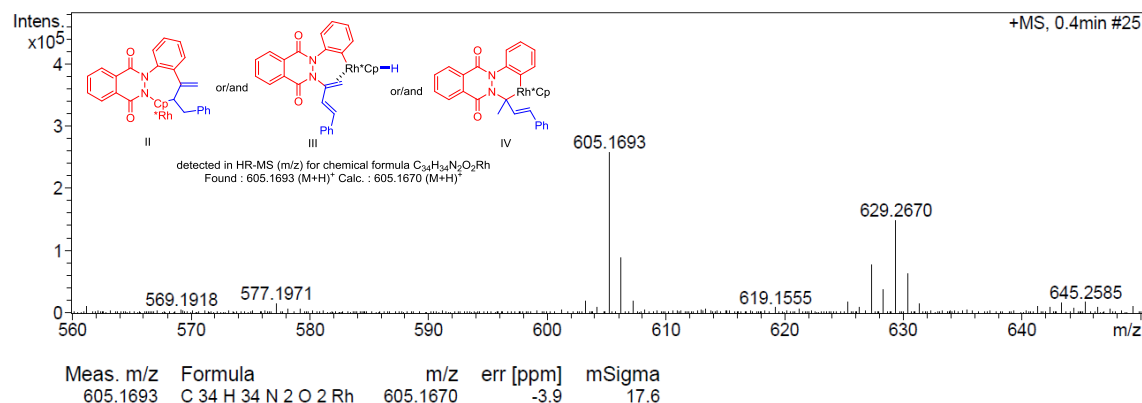

## 8. Analytical data and copies of NMR spectra

### 8.1 Analytical data for products

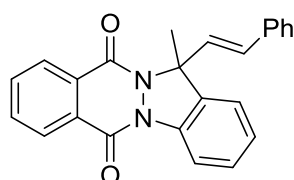

**3a**

#### **(E)-13-methyl-13-styryl-13H-indazolo[1,2-*b*]phthalazine-6,11-dione**

Compound **3a** was isolated as a yellow solid (64.6 mg, 88% yield). M.P.: 74-75 °C. <sup>1</sup>H NMR (600 MHz, CDCl<sub>3</sub>, ppm) δ 8.49 (d, *J* = 7.8 Hz, 1H), 8.43 - 8.36 (m, 1H), 8.35 - 8.29 (m, 1H), 7.80 - 7.75 (m, 2H), 7.47 - 7.42 (m, 1H), 7.37 - 7.34 (m, 2H), 7.33 - 7.27 (m, 2H), 7.26 - 7.22 (m, 2H), 7.21 - 7.17 (m, 1H), 6.92 (d, *J* = 16.2 Hz, 1H), 6.50 (d, *J* = 16.2 Hz, 1H), 2.23 (s, 3H). <sup>13</sup>C NMR (150 MHz, CDCl<sub>3</sub>, ppm) δ 154.7, 154.6, 135.7, 135.4, 133.3, 133.1, 131.6, 131.5, 129.4, 129.4, 129.3, 128.9, 128.4, 128.0, 127.3, 127.2, 126.8, 126.1, 122.8, 115.9, 71.4, 24.6. HRMS (ESI) *m/z* calcd for C<sub>24</sub>H<sub>19</sub>N<sub>2</sub>O<sub>2</sub><sup>+</sup> [M + H<sup>+</sup>]: 367.1441; found: 367.1430.

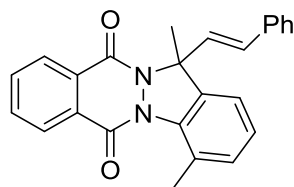

**3b**

#### **(E)-4,13-dimethyl-13-styryl-13H-indazolo[1,2-*b*]phthalazine-6,11-dione**

Compound **3b** was isolated as a yellow solid (20.1mg, 26% yield). M.P.: 80-81 °C. <sup>1</sup>H NMR (400 MHz, CDCl<sub>3</sub>, ppm) δ 8.30 - 8.19 (m, 2H), 7.77 - 7.71 (m, 2H), 7.30 - 7.26 (m, 1H), 7.23 - 7.10 (m, 6H), 7.05 - 7.01 (m, 1H), 6.78 (d, *J* = 16.0 Hz, 1H), 6.43 (d, *J* = 16.4 Hz, 1H), 2.51 (s, 3H), 2.13 (s, 3H). <sup>13</sup>C NMR (100 MHz, CDCl<sub>3</sub>, ppm) δ 156.4, 156.1, 135.8, 134.5, 134.0, 133.4, 133.2, 132.6, 131.4, 130.1, 129.8, 129.2,

128.5, 128.1, 127.5, 127.2, 126.9, 120.3, 71.8, 25.2, 22.4. HRMS (ESI)  $m/z$  calcd for  $C_{25}H_{21}N_2O_2^+$   $[M + H^+]$ : 381.1598; found: 381.1603.

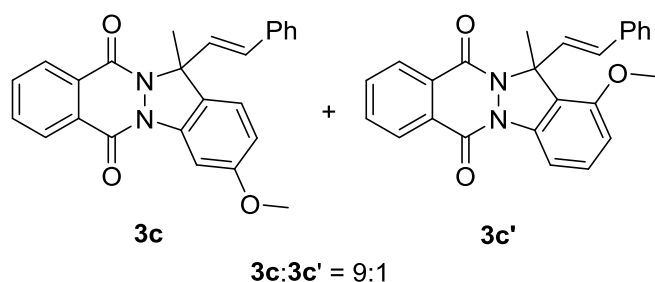

**(E)-3-methoxy-13-methyl-13-styryl-13H-indazolo[1,2-*b*]phthalazine-6,11-dione (3c) and (E)-1-methoxy-13-methyl-13-styryl-13H-indazolo[1,2-*b*]phthalazine-6,11-dione (3c')**. Compound 3c and 3c' were isolated as a yellow solid (55.5mg, 70% yield, 3c:3c' = 9:1).  $^1H$  NMR (400 MHz,  $CDCl_3$ , ppm)  $\delta$  8.44 - 8.38 (m, 1H), 8.37 - 8.30 (m, 1H), 8.21 - 8.11 (m, 1H), 7.89 - 7.79 (m, 2H), 7.47 - 7.34 (m, 2H), 7.32 - 7.14 (m, 4H), 6.97 - 6.82 (m, 2H), 6.54 - 6.37 (m, 1H), 3.92 (s, 2.7H), 3.86 (s, 0.3H), 2.33 (s, 0.3H), 2.21 (s, 2.7H).  $^{13}C$  NMR (100 MHz,  $CDCl_3$ , ppm)  $\delta$  160.7, 154.9, 154.8, 154.6, 154.4, 136.6, 136.5, 136.3, 135.8, 133.5, 133.4, 133.2, 133.1, 131.4, 131.0, 130.9, 129.5, 129.5, 129.4, 129.2, 128.5, 128.4, 128.2, 128.1, 127.8, 127.4, 127.4, 127.3, 126.9, 126.8, 123.4, 123.4, 113.4, 109.1, 108.7, 101.1, 72.1, 71.4, 55.8, 55.7, 24.9, 21.8. HRMS (ESI)  $m/z$  calcd for  $C_{25}H_{21}N_2O_3^+$   $[M + H^+]$ : 397.1547; found: 397.1554.

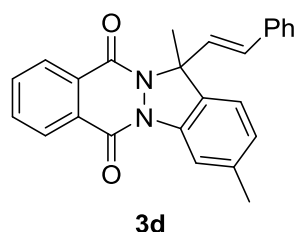

**(E)-3,13-dimethyl-13-styryl-13H-indazolo[1,2-*b*]phthalazine-6,11-dione (3d)**. Compound 3d was isolated as a yellow solid (58.7mg, 77% yield). M.P.: 82-83 °C.  $^1H$  NMR (600 MHz,  $CDCl_3$ , ppm)  $\delta$  8.43 - 8.39 (m, 1H), 8.38 - 8.31 (m, 2H), 7.84 - 7.78 (m, 2H), 7.38 - 7.34 (m, 2H), 7.27 - 7.25 (m, 2H), 7.22 - 7.19 (m, 1H), 7.17 (d,  $J = 7.2$  Hz, 1H), 7.15 - 7.12 (m, 1H), 6.92 (d,  $J = 16.2$  Hz, 1H), 6.48 (d,  $J = 16.2$  Hz, 1H), 2.47 (s, 3H), 2.22 (s, 3H).  $^{13}C$  NMR (150 MHz,  $CDCl_3$ , ppm)  $\delta$  154.8, 154.7, 139.9, 135.8, 135.7, 133.4, 133.1, 131.4, 129.6, 129.4, 129.2, 128.9, 128.5, 128.1, 127.3, 127.3, 127.0, 126.8, 122.5, 116.5, 71.5, 24.8, 21.7. HRMS (ESI)  $m/z$  calcd for  $C_{25}H_{21}N_2O_2^+$   $[M + H^+]$ : 381.1598; found: 381.1607.

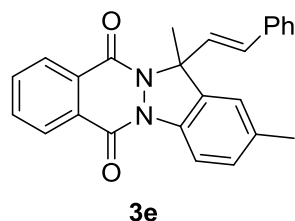

**(E)-2,13-dimethyl-13-styryl-13H-indazolo[1,2-b]phthalazine-6,11-dione**

Compound **3e** was isolated as a yellow solid (54.5mg, 72% yield). M.P.: 84-85 °C. <sup>1</sup>H NMR (600 MHz, CDCl<sub>3</sub>, ppm) δ 8.43 - 8.39 (m, 1H), 8.37 (d, *J* = 8.4 Hz, 1H), 8.35 - 8.30 (m, 1H), 7.82 - 7.78 (m, 2H), 7.39 - 7.36 (m, 2H), 7.29 - 7.25 (m, 3H), 7.23 - 7.19 (m, 1H), 7.08 (s, 1H), 6.88 (d, *J* = 16.2 Hz, 1H), 6.52 (d, *J* = 16.2 Hz, 1H), 2.42 (s, 3H), 2.22 (s, 3H). <sup>13</sup>C NMR (150 MHz, CDCl<sub>3</sub>, ppm) δ 154.8, 154.4, 136.4, 135.8, 133.3, 133.3, 133.2, 131.9, 131.5, 130.1, 129.6, 129.4, 129.1, 128.5, 128.1, 127.3, 127.3, 126.9, 123.2, 115.8, 71.5, 24.6, 21.3. HRMS (ESI) *m/z* calcd for C<sub>25</sub>H<sub>21</sub>N<sub>2</sub>O<sub>2</sub><sup>+</sup> [M + H<sup>+</sup>]: 381.1598; found: 381.1600.

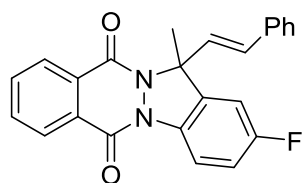

**3f**

**(E)-2-fluoro-13-methyl-13-styryl-13H-indazolo[1,2-b]phthalazine-6,11-dione**

Compound **3f** was isolated as a yellow solid (51.5mg, 67% yield). M.P.: 82-83 °C. <sup>1</sup>H NMR (400 MHz, CDCl<sub>3</sub>, ppm) δ 8.51 - 8.45 (m, 1H), 8.43 - 8.37 (m, 1H), 8.36 - 8.30 (m, 1H), 7.86 - 7.78 (m, 2H), 7.39 - 7.37 (m, 2H), 7.31 - 7.13 (m, 4H), 7.01 (dd, *J* = 7.6, 2.4 Hz, 1H), 6.88 (d, *J* = 16.0 Hz, 1H), 6.52 (d, *J* = 16.0 Hz, 1H), 2.24 (s, 3H). <sup>13</sup>C NMR (100 MHz, CDCl<sub>3</sub>, ppm) δ 160.7 (d, *J* = 246.8 Hz), 154.8, 154.5, 135.5, 133.8, 133.8, 133.5, 133.3, 131.2, 131.6 (d, *J* = 2.3 Hz), 129.3 (d, *J* = 11.4 Hz), 128.5, 128.4, 128.4, 127.4, 127.3, 126.9, 117.5 (d, *J* = 8.3 Hz), 116.4 (d, *J* = 23.4 Hz), 110.3 (d, *J* = 25.6 Hz), 71.3 (d, *J* = 2.5 Hz), 24.6. <sup>19</sup>F NMR (376 MHz, CDCl<sub>3</sub>, ppm) δ -114.11. HRMS (ESI) *m/z* calcd for C<sub>24</sub>H<sub>18</sub>FN<sub>2</sub>O<sub>2</sub><sup>+</sup> [M + H<sup>+</sup>]: 385.1347; found: 381.1353.

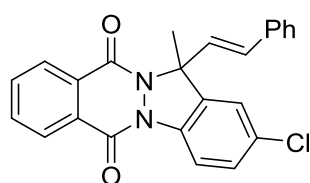

**3g**

**(E)-2-chloro-13-methyl-13-styryl-13H-indazolo[1,2-b]phthalazine-6,11-dione**

Compound **3g** was isolated as a yellow solid (54.2mg, 68% yield). M.P.: 103-104 °C. <sup>1</sup>H NMR (600 MHz, CDCl<sub>3</sub>, ppm) δ 8.42 (d, *J* = 8.4 Hz, 1H), 8.41 - 8.37 (m, 1H), 8.36 - 8.30 (m, 1H), 7.84 - 7.79 (m, 2H), 7.42 (dd, *J* = 9.0, 2.4 Hz, 1H), 7.40 - 7.36 (m, 2H), 7.31 - 7.21 (m, 4H), 6.86 (d, *J* = 16.2 Hz, 1H), 6.52 (d, *J* = 16.2 Hz, 1H), 2.23 (s, 3H). <sup>13</sup>C NMR (150 MHz, CDCl<sub>3</sub>, ppm) δ 154.7, 154.7, 135.5, 134.1, 133.6, 133.6, 133.3, 132.0, 131.5, 129.7, 129.4, 129.3, 128.5, 128.4, 128.4, 127.4, 127.4, 126.9, 123.1, 117.1, 71.3, 24.6. HRMS (ESI) *m/z* calcd for C<sub>24</sub>H<sub>18</sub>ClN<sub>2</sub>O<sub>2</sub><sup>+</sup> [M + H<sup>+</sup>]: 401.1051; found: 401.1055.

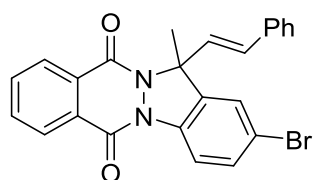

**3h**

**(E)-2-bromo-13-methyl-13-styryl-13H-indazolo[1,2-*b*]phthalazine-6,11-dione**

Compound **3h** was isolated as a yellow solid (33.0mg, 37% yield). M.P.: 138-139 °C. <sup>1</sup>H NMR (400 MHz, CDCl<sub>3</sub>, ppm) δ 8.48 - 8.30 (m, 3H), 7.89 - 7.81 (m, 2H), 7.59 (dd, *J* = 8.8, 2.0 Hz, 1H), 7.44 - 7.36 (m, 3H), 7.33 - 7.21 (m, 3H), 6.85 (d, *J* = 16.0 Hz, 1H), 6.52 (d, *J* = 16.4 Hz, 1H), 2.23 (s, 3H). <sup>13</sup>C NMR (100 MHz, CDCl<sub>3</sub>, ppm) δ 154.8, 154.7, 135.5, 134.6, 133.9, 133.7, 133.4, 132.6, 132.0, 129.4, 129.3, 128.6, 128.4, 128.4, 127.5, 127.5, 126.9, 126.0, 119.0, 117.5, 71.2, 24.7. HRMS (ESI) *m/z* calcd for C<sub>24</sub>H<sub>18</sub>BrN<sub>2</sub>O<sub>2</sub><sup>+</sup> [M + H<sup>+</sup>]: 445.0546; found: 445.0559.

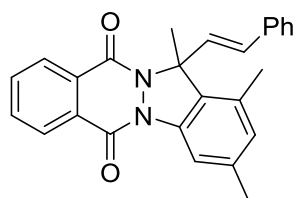

**3i**

**(E)-1,3,13-trimethyl-13-styryl-13H-indazolo[1,2-*b*]phthalazine-6,11-dione**

Compound **3i** was isolated as a yellow solid (48.9mg, 62% yield). M.P.: 113-114 °C. <sup>1</sup>H NMR (400 MHz, CDCl<sub>3</sub>, ppm) δ 8.43 - 8.38 (m, 1H), 8.36 - 8.26 (m, 2H), 7.86 - 7.78 (m, 2H), 7.39 (d, *J* = 7.2 Hz, 2H), 7.32 - 7.19 (m, 3H), 6.96 - 6.87 (m, 2H), 6.50 (d, *J* = 16.0 Hz, 1H), 2.44 (s, 3H), 2.32 (s, 3H), 2.27 (s, 3H). <sup>13</sup>C NMR (100 MHz, CDCl<sub>3</sub>, ppm) δ 154.5, 154.2, 139.6, 136.0, 135.7, 133.3, 133.1, 132.9, 132.6, 129.9, 129.5, 129.4, 128.5, 128.1, 127.6, 127.3, 127.1, 126.8, 126.3, 114.2, 71.5, 21.9, 21.5, 18.4. HRMS (ESI) *m/z* calcd for C<sub>26</sub>H<sub>23</sub>N<sub>2</sub>O<sub>2</sub><sup>+</sup> [M + H<sup>+</sup>]: 395.1754; found: 395.1773.

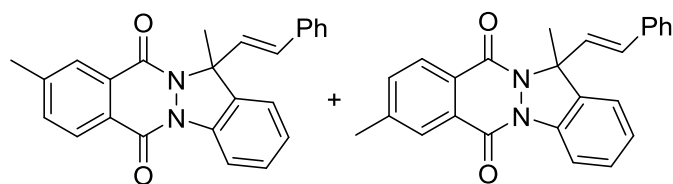

**3j**

**3j'**

**3j:3j' = 1:1**

**(E)-9,13-dimethyl-13-styryl-13H-indazolo[1,2-*b*]phthalazine-6,11-dione (3j) and (E)-8,13-dimethyl-13-styryl-13H-indazolo[1,2-*b*]phthalazine-6,11-dione(3j')**

Compound **3j** and **3j'** were isolated as a yellow solid (66.4mg, 87% yield, **3j**: **3j'** = 1:1). <sup>1</sup>H NMR (400 MHz, CDCl<sub>3</sub>, ppm) δ 8.55 - 8.46 (m, 1H), 8.34 - 8.11 (m, 2H), 7.66 - 7.60 (m, 1H), 7.51 - 7.45 (m, 1H), 7.41 - 7.18 (m, 7H), 6.92 (d, *J* = 16.0 Hz,



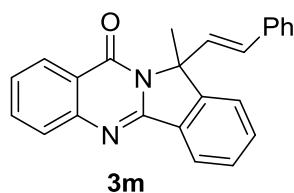

**(E)-12-methyl-12-styrylisoindolo[1,2-*b*]quinazolin-10(12*H*)-one**

Compound **3m** was isolated as a yellow solid (50.4mg, 72% yield). M.P.: 124-125 °C. <sup>1</sup>H NMR (600 MHz, CDCl<sub>3</sub>, ppm) δ 8.33 (dd, *J* = 7.8, 0.6 Hz, 1H), 8.21 (d, *J* = 7.2 Hz, 1H), 7.82 (d, *J* = 8.4 Hz, 1H), 7.78 - 7.73 (m, 1H), 7.68 - 7.63 (m, 1H), 7.61 - 7.57 (m, 1H), 7.50 - 7.43 (m, 2H), 7.36 - 7.32 (m, 2H), 7.28 - 7.23 (m, 2H), 7.22 - 7.18 (m, 1H), 6.77 (d, *J* = 16.2 Hz, 1H), 6.54 (d, *J* = 16.2 Hz, 1H), 2.17 (s, 3H). <sup>13</sup>C NMR (150 MHz, CDCl<sub>3</sub>, ppm) δ 160.2, 153.9, 148.4, 135.9, 134.2, 132.7, 131.5, 130.8, 129.2, 128.5, 128.4, 128.1, 127.1, 126.8, 126.7, 126.4, 123.7, 123.0, 121.9, 71.1, 23.2. HRMS (ESI) *m/z* calcd for C<sub>24</sub>H<sub>19</sub>N<sub>2</sub>O<sup>+</sup> [M + H<sup>+</sup>]: 351.1492; found: 351.1494.

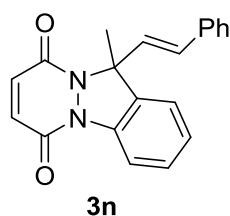

**(E)-11-methyl-11-styryl-11*H*-pyridazino[1,2-*a*]indazole-6,9-dione**

Compound **3n** was isolated as a yellow solid (39.2mg, 62% yield). M.P.: 112-113 °C. <sup>1</sup>H NMR (600 MHz, CDCl<sub>3</sub>, ppm) δ 8.39 (d, *J* = 7.8 Hz, 1H), 7.48 - 7.44 (m, 1H), 7.37 - 7.32 (m, 3H), 7.30 - 7.26 (m, 3H), 7.25 - 7.21 (m, 1H), 6.95 (d, *J* = 10.2 Hz, 1H), 6.87 (d, *J* = 10.2 Hz, 1H), 6.83 (d, *J* = 15.6 Hz, 1H), 6.44 (d, *J* = 16.2 Hz, 1H), 2.16 (s, 3H). <sup>13</sup>C NMR (150 MHz, CDCl<sub>3</sub>, ppm) δ 154.0, 153.8, 135.6, 135.3, 135.1, 135.1, 132.0, 131.4, 129.5, 128.5, 128.3, 127.8, 126.8, 126.6, 122.8, 115.7, 72.0, 24.1. HRMS (ESI) *m/z* calcd for C<sub>20</sub>H<sub>17</sub>N<sub>2</sub>O<sub>2</sub><sup>+</sup> [M + H<sup>+</sup>]: 317.1285; found: 317.1291.

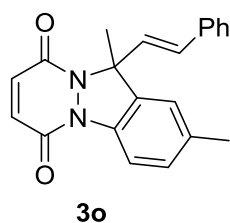

**(E)-2,11-dimethyl-11-styryl-11*H*-pyridazino[1,2-*a*]indazole-6,9-dione**

Compound **3o** was isolated as a yellow solid (40.4mg, 61% yield). M.P.: 163-164 °C. <sup>1</sup>H NMR (400 MHz, CDCl<sub>3</sub>, ppm) δ 8.25 (d, *J* = 8.4 Hz, 1H), 7.41 - 7.34 (m, 2H), 7.32 - 7.18 (m, 4H), 7.07 (s, 1H), 6.97 (d, *J* = 10.4 Hz, 1H), 6.86 (d, *J* = 10.0 Hz, 1H),

6.79 (d,  $J = 16.0$  Hz, 1H), 6.46 (d,  $J = 16.0$  Hz, 1H), 2.42 (s, 3H), 2.14 (s, 3H).  $^{13}\text{C}$  NMR (100 MHz,  $\text{CDCl}_3$ , ppm)  $\delta$  154.1, 153.6, 137.0, 135.6, 135.2, 135.1, 133.0, 131.9, 131.6, 130.2, 128.5, 128.3, 127.9, 126.9, 123.2, 115.5, 72.0, 24.0, 21.4. HRMS (ESI)  $m/z$  calcd for  $\text{C}_{21}\text{H}_{19}\text{N}_2\text{O}_2^+$  [ $\text{M} + \text{H}^+$ ]: 331.1441; found: 331.1433.

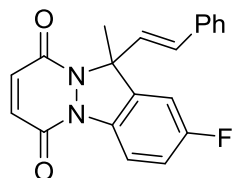

**3p**

**(E)-2-fluoro-11-methyl-11-styryl-11H-pyridazino[1,2-a]indazole-6,9-dione**

Compound **3p** was isolated as a yellow solid (43.5mg, 65% yield). M.P.: 128-129 °C.  $^1\text{H}$  NMR (400 MHz,  $\text{CDCl}_3$ , ppm)  $\delta$  8.43 - 8.32 (m, 1H), 7.39 - 7.34 (m, 2H), 7.33 - 7.23 (m, 3H), 7.16 (td,  $J = 8.8, 2.4$  Hz, 1H), 7.02 - 6.93 (m, 2H), 6.87 (d,  $J = 10.4$  Hz, 1H), 6.78 (d,  $J = 16.0$  Hz, 1H), 6.46 (d,  $J = 16.0$  Hz, 1H), 2.15 (s, 3H).  $^{13}\text{C}$  NMR (100 MHz,  $\text{CDCl}_3$ , ppm)  $\delta$  161.0 (d,  $J = 247.7$  Hz), 154.0, 153.6, 135.3, 135.1, 133.6, 133.6, 132.5, 131.3 (d,  $J = 2.2$  Hz), 128.6, 128.5, 127.2, 126.9, 117.3 (d,  $J = 8.3$  Hz), 116.6 (d,  $J = 23.5$  Hz), 110.4 (d,  $J = 25.7$  Hz), 71.9 (d,  $J = 2.5$  Hz), 24.0.  $^{19}\text{F}$  NMR (376 MHz,  $\text{CDCl}_3$ , ppm)  $\delta$  -113.12. HRMS (ESI)  $m/z$  calcd for  $\text{C}_{20}\text{H}_{16}\text{FN}_2\text{O}_2^+$  [ $\text{M} + \text{H}^+$ ]: 335.1190; found: 335.1195.

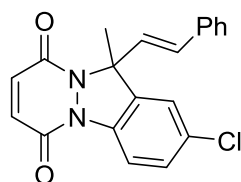

**3q**

**(E)-2-chloro-11-methyl-11-styryl-11H-pyridazino[1,2-a]indazole-6,9-dione**

Compound **3q** was isolated as a yellow solid (44.2mg, 63% yield). M.P.: 153-154 °C.  $^1\text{H}$  NMR (400 MHz,  $\text{CDCl}_3$ , ppm)  $\delta$  8.32 (d,  $J = 8.4$  Hz, 1H), 7.42 (dd,  $J = 8.8, 2.0$  Hz, 1H), 7.40 - 7.35 (m, 2H), 7.34 - 7.21 (m, 4H), 6.95 (d,  $J = 10.4$  Hz, 1H), 6.88 (d,  $J = 10.4$  Hz, 1H), 6.76 (d,  $J = 16.4$  Hz, 1H), 6.46 (d,  $J = 16.0$  Hz, 1H), 2.15 (s, 3H).  $^{13}\text{C}$  NMR (100 MHz,  $\text{CDCl}_3$ , ppm)  $\delta$  153.9, 153.7, 135.6, 135.3, 135.0, 133.6, 133.3, 132.5, 132.1, 129.8, 128.6, 128.5, 127.2, 126.9, 123.1, 116.8, 71.8, 24.0. HRMS (ESI)  $m/z$  calcd for  $\text{C}_{20}\text{H}_{16}\text{ClN}_2\text{O}_2^+$  [ $\text{M} + \text{H}^+$ ]: 351.0895; found: 351.0887

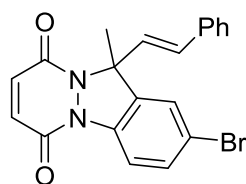

**3r**

**(E)-2-bromo-11-methyl-11-styryl-11H-pyridazino[1,2-a]indazole-6,9-dione**

Compound **3r** was isolated as a yellow solid (46.6mg, 59% yield). M.P.: 191-192 °C. <sup>1</sup>H NMR (400 MHz, CDCl<sub>3</sub>, ppm) δ 8.27 (d, *J* = 8.8 Hz, 1H), 7.58 (dd, *J* = 8.8, 2.0 Hz, 1H), 7.43 - 7.36 (m, 3H), 7.34 - 7.22 (m, 3H), 6.97 (d, *J* = 10.0 Hz, 1H), 6.90 (d, *J* = 10.4 Hz, 1H), 6.76 (d, *J* = 16.4 Hz, 1H), 6.47 (d, *J* = 16.4 Hz, 1H), 2.15 (s, 3H). <sup>13</sup>C NMR (100 MHz, CDCl<sub>3</sub>, ppm) δ 153.9, 153.8, 135.7, 135.3, 135.0, 134.1, 133.6, 132.7, 132.5, 128.6, 128.5, 127.2, 126.9, 126.0, 119.6, 117.2, 71.7, 24.0. HRMS (ESI) *m/z* calcd for C<sub>20</sub>H<sub>16</sub>BrN<sub>2</sub>O<sub>2</sub><sup>+</sup> [M + H<sup>+</sup>]: 395.0390; found: 395.0385.

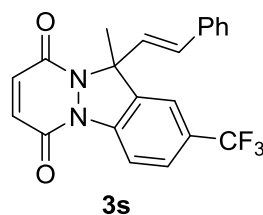

**(E)-11-methyl-11-styryl-2-(trifluoromethyl)-11H-pyridazino[1,2-a]indazole-6,9-dione**

Compound **3s** was isolated as a yellow solid (45.3mg, 59% yield). M.P.: 177-178 °C. <sup>1</sup>H NMR (400 MHz, CDCl<sub>3</sub>, ppm) δ 8.48 (d, *J* = 8.4 Hz, 1H), 7.77 - 7.70 (m, 1H), 7.52 (s, 1H), 7.39 - 7.34 (m, 2H), 7.33 - 7.23 (m, 3H), 6.96 (d, *J* = 10.4 Hz, 1H), 6.90 (d, *J* = 10.4 Hz, 1H), 6.77 (d, *J* = 16.0 Hz, 1H), 6.45 (d, *J* = 16.4 Hz, 1H), 2.18 (s, 3H). <sup>13</sup>C NMR (100 MHz, CDCl<sub>3</sub>, ppm) δ 154.2, 153.9, 137.5, 136.1, 135.2, 134.8, 132.6, 132.3, 129.0, 128.6, 127.3 (q, *J* = 3.7 Hz), 127.0, 127.0, 124.9, 122.2, 120.1 (q, *J* = 3.7 Hz), 115.9, 72.0, 24.1. <sup>19</sup>F NMR (376 MHz, CDCl<sub>3</sub>, ppm) δ -61.94. HRMS (ESI) *m/z* calcd for C<sub>21</sub>H<sub>16</sub>F<sub>3</sub>N<sub>2</sub>O<sub>2</sub><sup>+</sup> [M + H<sup>+</sup>]: 385.1158; found: 385.1160.

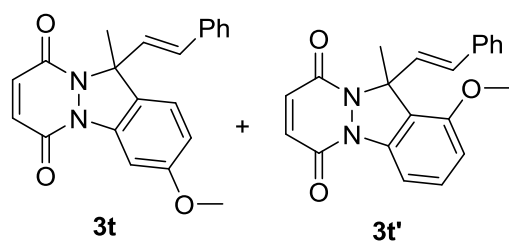

**3t:3t' = 9:1**

**(E)-3-methoxy-11-methyl-11-styryl-11H-pyridazino[1,2-a]indazole-6,9-dione(3t)**  
**and**

**(E)-1-methoxy-11-methyl-11-styryl-11H-pyridazino[1,2-a]indazole-6,9-dione(3t')**

Compound **3t** and **3t'** were isolated as a yellow solid (38.2mg, 55% yield, **3t:3t'** = 9:1). <sup>1</sup>H NMR (400 MHz, CDCl<sub>3</sub>, ppm) δ 8.07 - 7.97 (m, 1H), 7.39 - 7.33 (m, 2H), 7.32 - 7.20 (m, 3H), 7.16 (d, *J* = 8.4 Hz, 1H), 6.96 (d, *J* = 10.0 Hz, 1H), 6.92-6.75 (m, 3H), 6.50-6.30 (m, 1H), 3.90 (s, 2.7H), 3.86 (s, 0.3H), 2.24 (s, 0.3H), 2.12 (s, 2.7H). <sup>13</sup>C NMR (100 MHz, CDCl<sub>3</sub>, ppm) δ 160.7, 154.6, 154.0, 154.0, 153.9, 136.3, 136.1, 135.6, 135.5, 135.4, 135.0, 131.9, 131.3, 131.0, 128.5, 128.4, 128.3, 128.1, 128.0,



126.9, 126.8, 126.2, 123.4, 123.1, 113.7, 109.5, 108.4, 100.9, 72.7, 71.9, 55.9, 55.7, 24.3, 21.1. **HRMS (ESI)** m/z calcd for C<sub>21</sub>H<sub>19</sub>N<sub>2</sub>O<sub>3</sub><sup>+</sup> [M + H<sup>+</sup>]: 347.1390; found: 347.1392.

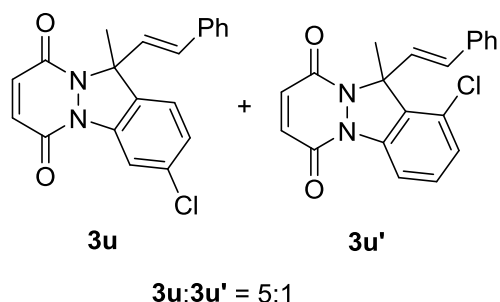

**(E)-3-chloro-11-methyl-11-styryl-11H-pyridazino[1,2-a]indazole-6,9-dione(3u)**  
and

**(E)-1-chloro-11-methyl-11-styryl-11H-pyridazino[1,2-a]indazole-6,9-dione(3u')**

Compound **3u** and **3u'** were isolated as a yellow solid (40.6mg, 58% yield, **3u:3u'** = 5:1). <sup>1</sup>H NMR (400 MHz, CDCl<sub>3</sub>, ppm) δ 8.47 - 8.34 (m, 1H), 7.39 - 7.22 (m, 6H), 7.20 (d, *J* = 8.0 Hz, 1H), 6.97 - 6.91 (m, 1H), 6.88 (d, *J* = 10.4 Hz, 1H), 6.85 - 6.72 (m, 1H), 6.48 - 6.36 (m, 1H), 2.30 (s, 0.5H), 2.13 (s, 2.5H). <sup>13</sup>C NMR (100 MHz, CDCl<sub>3</sub>, ppm) δ 153.9, 153.9, 153.4, 136.6, 135.8, 135.7, 135.5, 135.4, 135.2, 134.8, 133.2, 132.4, 130.9, 129.7, 129.4, 128.6, 128.5, 128.5, 128.4, 128.4, 128.3, 128.2, 128.2, 128.1, 127.2, 126.9, 124.9, 123.8, 116.0, 114.2, 72.9, 72.0, 24.1, 20.7. **HRMS (ESI)** m/z calcd for C<sub>20</sub>H<sub>16</sub>ClN<sub>2</sub>O<sub>2</sub><sup>+</sup> [M + H<sup>+</sup>]: 351.0895; found: 351.0896.

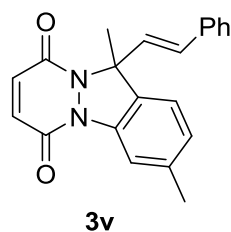

**(E)-3,11-dimethyl-11-styryl-11H-pyridazino[1,2-a]indazole-6,9-dione**

Compound **3v** was isolated as a yellow solid (44.9mg, 68% yield). M.P.: 184-185 °C. <sup>1</sup>H NMR (400 MHz, CDCl<sub>3</sub>, ppm) δ 8.23 (s, 1H), 7.38 - 7.32 (m, 2H), 7.32 - 7.20 (m, 3H), 7.16 (d, *J* = 0.8 Hz, 2H), 6.95 (d, *J* = 10.0 Hz, 1H), 6.89 - 6.79 (m, 2H), 6.42 (d, *J* = 16.0 Hz, 1H), 2.46 (s, 3H), 2.13 (s, 3H). <sup>13</sup>C NMR (100 MHz, CDCl<sub>3</sub>, ppm) δ 154.1, 153.8, 140.0, 135.6, 135.3, 135.3, 135.1, 131.9, 128.6, 128.5, 128.3, 127.9, 127.5, 126.9, 122.5, 116.2, 72.0, 24.2, 21.6. **HRMS (ESI)** m/z calcd for C<sub>21</sub>H<sub>19</sub>N<sub>2</sub>O<sub>2</sub><sup>+</sup> [M + H<sup>+</sup>]: 331.1441; found: 331.1444.

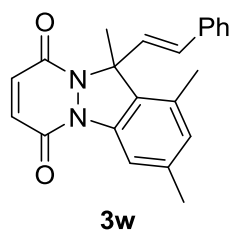

**(E)-1,3,11-trimethyl-11-styryl-11H-pyridazino[1,2-a]indazole-6,9-dione**

Compound **3w** was isolated as a yellow solid (35.9mg, 52% yield). M.P.: 190-191 °C. <sup>1</sup>H NMR (400 MHz, CDCl<sub>3</sub>, ppm) δ 8.17 (s, 1H), 7.41 - 7.34 (m, 2H), 7.32 - 7.19 (m, 3H), 6.97 - 6.90 (m, 2H), 6.86 - 6.76 (m, 2H), 6.43 (d, *J* = 16.0 Hz, 1H), 2.42 (s, 3H), 2.30 (s, 3H), 2.18 (s, 3H). <sup>13</sup>C NMR (100 MHz, CDCl<sub>3</sub>, ppm) δ 153.7, 153.6, 139.8, 135.7, 135.7, 135.2, 135.1, 133.0, 130.3, 128.5, 128.3, 126.9, 126.5, 126.2, 113.9, 72.1, 21.4, 21.3, 18.3. HRMS (ESI) *m/z* calcd for C<sub>22</sub>H<sub>21</sub>N<sub>2</sub>O<sub>2</sub><sup>+</sup> [M + H<sup>+</sup>]: 345.1598; found: 345.1612.

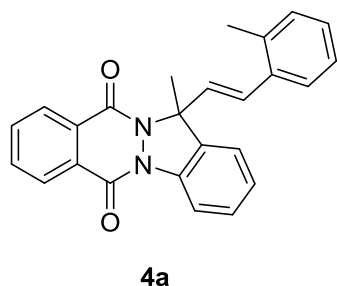

**(E)-13-methyl-13-(2-methylstyryl)-13H-indazolo[1,2-b]phthalazine-6,11-dione**

Compound **4a** was isolated as a yellow solid (68.5mg, 90% yield). M.P.: 146-147 °C. <sup>1</sup>H NMR (600 MHz, CDCl<sub>3</sub>, ppm) δ 8.51 (d, *J* = 7.8 Hz, 1H), 8.46 - 8.40 (m, 1H), 8.39 - 8.33 (m, 1H), 7.86 - 7.80 (m, 2H), 7.51 - 7.46 (m, 1H), 7.45 - 7.42 (m, 1H), 7.36 - 7.29 (m, 2H), 7.16 - 7.07 (m, 3H), 6.78 (d, *J* = 16.2 Hz, 1H), 6.74 (d, *J* = 16.2 Hz, 1H), 2.24 (s, 6H). <sup>13</sup>C NMR (150 MHz, CDCl<sub>3</sub>, ppm) δ 154.8, 154.8, 135.8, 135.6, 135.0, 133.5, 133.2, 131.8, 130.4, 130.2, 129.6, 129.5, 129.5, 129.5, 128.0, 127.4, 127.3, 126.2, 126.1, 126.0, 122.8, 116.1, 71.7, 24.8, 19.6. HRMS (ESI) *m/z* calcd for C<sub>25</sub>H<sub>20</sub>NaN<sub>2</sub>O<sub>2</sub><sup>+</sup> [M + Na<sup>+</sup>]: 403.1417; found: 403.1417.

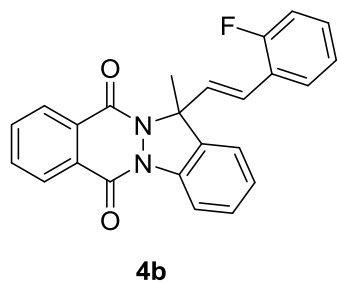

**(E)-13-(2-fluorostyryl)-13-methyl-13H-indazolo[1,2-b]phthalazine-6,11-dione**

Compound **4b** was isolated as a yellow solid (57.4mg, 75% yield). M.P.: 110-111 °C.

$^1\text{H}$  NMR (400 MHz,  $\text{CDCl}_3$ , ppm)  $\delta$  8.50 (d,  $J = 8.0$  Hz, 1H), 8.46 - 8.40 (m, 1H), 8.39 - 8.32 (m, 1H), 7.86 - 7.79 (m, 2H), 7.52 - 7.43 (m, 2H), 7.37 - 7.28 (m, 2H), 7.23 - 7.16 (m, 1H), 7.08 - 6.93 (m, 3H), 6.72 (d,  $J = 16.4$  Hz, 1H), 2.24 (s, 3H).  $^{13}\text{C}$  NMR (100 MHz,  $\text{CDCl}_3$ , ppm)  $\delta$  160.3 (d,  $J = 250.0$  Hz), 154.8, 154.8, 135.5, 133.3 (d,  $J = 20.6$  Hz), 131.5, 131.4 (d,  $J = 4.7$  Hz), 129.6, 129.5, 129.5, 129.4, 129.3, 127.6 (d,  $J = 3.4$  Hz), 127.4 (d,  $J = 6.1$  Hz), 126.3, 124.0 (d,  $J = 3.5$  Hz), 123.8 (d,  $J = 3.9$  Hz), 123.7 (d,  $J = 12.0$  Hz), 122.8, 116.1, 115.8, 115.5, 71.6, 24.5.  $^{19}\text{F}$  NMR (376 MHz,  $\text{CDCl}_3$ , ppm)  $\delta$  -117.42. HRMS (ESI)  $m/z$  calcd for  $\text{C}_{24}\text{H}_{18}\text{FN}_2\text{O}_2^+$  [ $\text{M} + \text{H}^+$ ]: 385.1347; found: 385.1349.

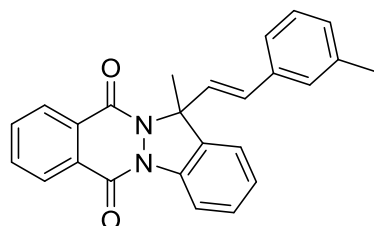

4c

**(E)-13-methyl-13-(3-methylstyryl)-13H-indazolo[1,2-b]phthalazine-6,11-dione**

Compound **4c** was isolated as a yellow solid (63.1mg, 83% yield). M.P.: 66-67 °C.  $^1\text{H}$  NMR (400 MHz,  $\text{CDCl}_3$ , ppm)  $\delta$  8.50 (d,  $J = 8.0$  Hz, 1H), 8.46 - 8.38 (m, 1H), 8.38 - 8.29 (m, 1H), 7.87 - 7.75 (m, 2H), 7.51 - 7.43 (m, 1H), 7.37 - 7.27 (m, 2H), 7.20 (s, 1H), 7.19 - 7.11 (m, 2H), 7.06 - 7.00 (m, 1H), 6.92 (d,  $J = 16.4$  Hz, 1H), 6.46 (d,  $J = 16.4$  Hz, 1H), 2.29 (s, 3H), 2.24 (s, 3H).  $^{13}\text{C}$  NMR (100 MHz,  $\text{CDCl}_3$ , ppm)  $\delta$  154.8, 154.8, 138.1, 135.6, 135.5, 133.4, 133.2, 131.7, 131.7, 129.5, 129.5, 129.4, 128.9, 128.7, 128.4, 127.4, 127.4, 127.3, 126.2, 124.1, 122.9, 116.0, 71.6, 24.8, 21.2. HRMS (ESI)  $m/z$  calcd for  $\text{C}_{25}\text{H}_{21}\text{N}_2\text{O}_2^+$  [ $\text{M} + \text{H}^+$ ]: 381.1598; found: 381.1616.

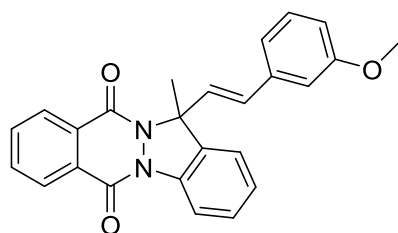

4d

**(E)-13-(3-methoxystyryl)-13-methyl-13H-indazolo[1,2-b]phthalazine-6,11-dione**

Compound **4d** was isolated as a yellow solid (52.3mg, 66% yield). M.P.: 70-71 °C.  $^1\text{H}$  NMR (600 MHz,  $\text{CDCl}_3$ , ppm)  $\delta$  8.50 (d,  $J = 8.4$  Hz, 1H), 8.45 - 8.39 (m, 1H), 8.38 - 8.31 (m, 1H), 7.87 - 7.78 (m, 2H), 7.51 - 7.45 (m, 1H), 7.36 - 7.28 (m, 2H), 7.18 (t,  $J = 7.8$  Hz, 1H), 6.96 (d,  $J = 7.8$  Hz, 1H), 6.93 - 6.86 (m, 2H), 6.78 (dd,  $J = 8.4, 2.4$  Hz, 1H), 6.47 (d,  $J = 16.2$  Hz, 1H), 3.77 (s, 3H), 2.24 (s, 3H).  $^{13}\text{C}$  NMR (150 MHz,  $\text{CDCl}_3$ , ppm)  $\delta$  159.7, 154.8, 154.8, 137.2, 135.5, 133.4, 133.2, 131.7, 131.6, 129.6, 129.5, 129.5, 129.4, 129.3, 127.4, 127.4, 126.2, 122.9, 119.6, 116.1, 114.2,

111.9, 71.5, 55.2, 24.7. **HRMS (ESI)**  $m/z$  calcd for  $C_{25}H_{21}N_2O_3^+$  [ $M + H^+$ ]: 397.1547; found: 397.1555.

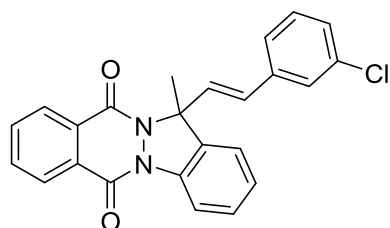

**4e**

**(E)-13-(3-chlorostyryl)-13-methyl-13H-indazolo[1,2-*b*]phthalazine-6,11-dione**

Compound **4e** was isolated as a yellow solid (61.7mg, 77% yield). M.P.: 94-95 °C.  $^1H$  NMR (400 MHz,  $CDCl_3$ , ppm)  $\delta$  8.50 (d,  $J = 8.0$  Hz, 1H), 8.45 - 8.38 (m, 1H), 8.37 - 8.29 (m, 1H), 7.87 - 7.77 (m, 2H), 7.53 - 7.44 (m, 1H), 7.39 - 7.27 (m, 3H), 7.24 - 7.16 (m, 3H), 6.92 (d,  $J = 16.4$  Hz, 1H), 6.45 (d,  $J = 16.0$  Hz, 1H), 2.23 (s, 3H).  $^{13}C$  NMR (100 MHz,  $CDCl_3$ , ppm)  $\delta$  154.8, 154.7, 137.6, 135.5, 134.5, 133.5, 133.3, 131.3, 130.5, 130.2, 129.7, 129.6, 129.5, 129.3, 128.1, 127.4, 127.3, 126.7, 126.3, 125.1, 122.8, 116.1, 71.3, 24.6. **HRMS (ESI)**  $m/z$  calcd for  $C_{24}H_{18}ClN_2O_2^+$  [ $M + H^+$ ]: 401.1051; found: 401.1054.

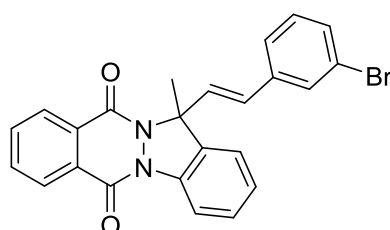

**4f**

**(E)-13-(3-bromostyryl)-13-methyl-13H-indazolo[1,2-*b*]phthalazine-6,11-dione**

Compound **4f** was isolated as a yellow solid (57.0mg, 64% yield). M.P.: 163-164 °C.  $^1H$  NMR (600 MHz,  $CDCl_3$ , ppm)  $\delta$  8.50 (d,  $J = 8.4$  Hz, 1H), 8.44 - 8.40 (m, 1H), 8.36 - 8.32 (m, 1H), 7.86 - 7.79 (m, 2H), 7.55 - 7.51 (m, 1H), 7.50 - 7.46 (m, 1H), 7.35 - 7.31 (m, 2H), 7.30 - 7.26 (m, 2H), 7.13 (t,  $J = 7.8$  Hz, 1H), 6.91 (d,  $J = 16.2$  Hz, 1H), 6.44 (d,  $J = 15.6$  Hz, 1H), 2.23 (s, 3H).  $^{13}C$  NMR (150 MHz,  $CDCl_3$ , ppm)  $\delta$  154.8, 154.8, 137.9, 135.5, 133.5, 133.3, 131.4, 131.0, 130.6, 130.1, 130.0, 129.6, 129.6, 129.5, 129.3, 127.4, 127.4, 126.3, 125.6, 122.8, 122.7, 116.1, 71.3, 24.6. **HRMS (ESI)**  $m/z$  calcd for  $C_{24}H_{18}BrN_2O_2^+$  [ $M + H^+$ ]: 445.0546; found: 445.0556.

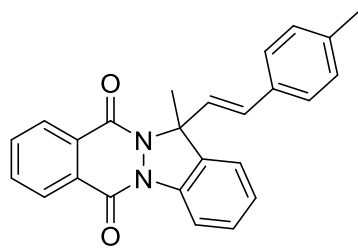

4g

**(E)-13-methyl-13-(4-methylstyryl)-13H-indazolo[1,2-*b*]phthalazine-6,11-dione**

Compound **4g** was isolated as a yellow solid (60.9mg, 80% yield). M.P.: 126-127 °C. <sup>1</sup>H NMR (600 MHz, CDCl<sub>3</sub>, ppm) δ 8.50 (d, *J* = 8.4 Hz, 1H), 8.44 - 8.38 (m, 1H), 8.37 - 8.31 (m, 1H), 7.84 - 7.78 (m, 2H), 7.50 - 7.44 (m, 1H), 7.34 - 7.27 (m, 2H), 7.27 - 7.23 (m, 2H), 7.07 (d, *J* = 7.8 Hz, 2H), 6.87 (d, *J* = 16.2 Hz, 1H), 6.45 (d, *J* = 16.2 Hz, 1H), 2.29 (s, 3H), 2.23 (s, 3H). <sup>13</sup>C NMR (150 MHz, CDCl<sub>3</sub>, ppm) δ 154.8, 138.1, 135.5, 133.4, 133.1, 133.0, 131.8, 131.5, 129.5, 129.5, 129.4, 129.2, 127.9, 127.4, 127.3, 126.8, 126.2, 122.9, 116.0, 71.7, 24.8, 21.1. HRMS (ESI) *m/z* calcd for C<sub>25</sub>H<sub>21</sub>N<sub>2</sub>O<sub>2</sub><sup>+</sup> [M + H<sup>+</sup>]: 381.1598; found: 381.1603.

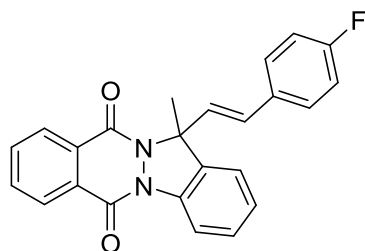

4h

**(E)-13-(4-fluorostyryl)-13-methyl-13H-indazolo[1,2-*b*]phthalazine-6,11-dione**

Compound **4h** was isolated as a yellow solid (56.9mg, 74% yield). M.P.: 118-119 °C. <sup>1</sup>H NMR (600 MHz, CDCl<sub>3</sub>, ppm) δ 8.50 (d, *J* = 8.4 Hz, 1H), 8.44 - 8.39 (m, 1H), 8.37 - 8.31 (m, 1H), 7.85 - 7.79 (m, 2H), 7.50 - 7.45 (m, 1H), 7.36 - 7.31 (m, 3H), 7.31 - 7.27 (m, 1H), 6.98 - 6.92 (m, 2H), 6.84 (d, *J* = 16.2 Hz, 1H), 6.46 (d, *J* = 16.2 Hz, 1H), 2.23 (s, 3H). <sup>13</sup>C NMR (150 MHz, CDCl<sub>3</sub>, ppm) δ 162.6 (d, *J* = 247.8 Hz), 154.8, 154.8, 135.5, 133.5, 133.2, 132.0 (d, *J* = 3.3 Hz), 131.6, 130.4, 129.5, 129.4, 128.8 (d, *J* = 2.5 Hz), 128.5 (d, *J* = 8.2 Hz), 127.4, 127.3, 126.2, 122.8, 116.1, 115.5, 115.4, 71.5, 24.7. <sup>19</sup>F NMR (376 MHz, CDCl<sub>3</sub>, ppm) δ -113.35. HRMS (ESI) *m/z* calcd for C<sub>24</sub>H<sub>18</sub>FN<sub>2</sub>O<sub>2</sub><sup>+</sup> [M + H<sup>+</sup>]: 385.1347; found: 385.1357.

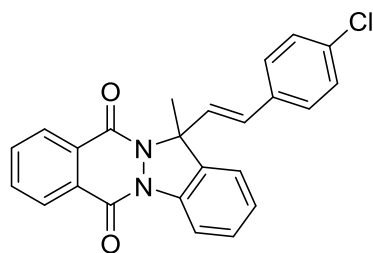

4i

**(E)-13-(4-chlorostyryl)-13-methyl-13H-indazolo[1,2-*b*]phthalazine-6,11-dione**

Compound **4i** was isolated as a yellow solid (55.3mg, 69% yield). M.P.: 131-132 °C. <sup>1</sup>H NMR (600 MHz, CDCl<sub>3</sub>, ppm) δ 8.50 (d, *J* = 7.8 Hz, 1H), 8.45 - 8.39 (m, 1H), 8.37 - 8.31 (m, 1H), 7.86 - 7.79 (m, 2H), 7.51 - 7.46 (m, 1H), 7.35 - 7.31 (m, 1H), 7.31 - 7.27 (d, *J* = 8.4 Hz, 3H), 7.25 - 7.21 (m, 2H), 6.89 (d, *J* = 16.2 Hz, 1H), 6.45 (d, *J* = 16.2 Hz, 1H), 2.23 (s, 3H). <sup>13</sup>C NMR (150 MHz, CDCl<sub>3</sub>, ppm) δ 154.8, 154.8, 135.5, 134.3, 133.8, 133.5, 133.3, 131.5, 130.4, 129.7, 129.6, 129.5, 129.4, 128.7, 128.1, 127.4, 127.4, 126.2, 122.8, 116.1, 71.4, 24.7. HRMS (ESI) *m/z* calcd for C<sub>24</sub>H<sub>18</sub>ClN<sub>2</sub>O<sub>2</sub><sup>+</sup> [M + H<sup>+</sup>]: 401.1051; found: 401.1068.

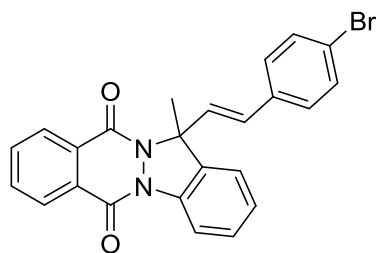

4j

**(E)-13-(4-bromostyryl)-13-methyl-13H-indazolo[1,2-*b*]phthalazine-6,11-dione**

Compound **4j** was isolated as a yellow solid (54.4mg, 61% yield). M.P.: 164-165 °C. <sup>1</sup>H NMR (600 MHz, CDCl<sub>3</sub>, ppm) δ 8.50 (d, *J* = 8.4 Hz, 1H), 8.45 - 8.39 (m, 1H), 8.37 - 8.30 (m, 1H), 7.88 - 7.80 (m, 2H), 7.51 - 7.46 (m, 1H), 7.42 - 7.37 (m, 2H), 7.33 (td, *J* = 7.8, 1.2 Hz, 1H), 7.31 - 7.27 (m, 1H), 7.25 - 7.20 (m, 2H), 6.91 (d, *J* = 16.2 Hz, 1H), 6.44 (d, *J* = 16.2 Hz, 1H), 2.23 (s, 3H). <sup>13</sup>C NMR (150 MHz, CDCl<sub>3</sub>, ppm) δ 154.8, 154.8, 135.6, 134.8, 133.5, 133.3, 131.6, 131.4, 130.4, 129.8, 129.6, 129.6, 129.4, 128.4, 127.4, 127.4, 126.2, 122.8, 122.0, 116.1, 71.4, 24.7. HRMS (ESI) *m/z* calcd for C<sub>24</sub>H<sub>18</sub>BrN<sub>2</sub>O<sub>2</sub><sup>+</sup> [M + H<sup>+</sup>]: 445.0546; found: 445.0563.

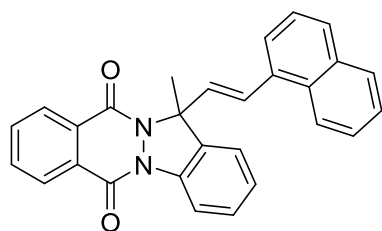

4k

**(E)-13-methyl-13-(2-(naphthalen-1-yl)vinyl)-13H-indazolo[1,2-b]phthalazine-6,11-dione**

Compound **4k** was isolated as a yellow solid (43.3mg, 52% yield). M.P.: 133-134 °C. <sup>1</sup>H NMR (600 MHz, CDCl<sub>3</sub>, ppm) δ 8.53 (d, *J* = 8.4 Hz, 1H), 8.45 - 8.39 (m, 1H), 8.38 - 8.32 (m, 1H), 7.84 - 7.79 (m, 2H), 7.77 - 7.69 (m, 4H), 7.58 (dd, *J* = 8.4, 1.2 Hz, 1H), 7.52 - 7.47 (m, 1H), 7.44 - 7.38 (m, 2H), 7.36 - 7.32 (m, 2H), 7.05 (d, *J* = 15.6 Hz, 1H), 6.65 (d, *J* = 16.2 Hz, 1H), 2.28 (s, 3H). <sup>13</sup>C NMR (150 MHz, CDCl<sub>3</sub>, ppm) δ 154.9, 154.8, 135.6, 133.5, 133.4, 133.3, 133.2, 133.2, 131.8, 131.7, 129.6, 129.6, 129.5, 129.3, 128.2, 128.0, 127.6, 127.4, 127.4, 127.2, 126.2, 126.1, 123.7, 122.9, 116.1, 71.7, 24.9. HRMS (ESI) *m/z* calcd for C<sub>28</sub>H<sub>21</sub>N<sub>2</sub>O<sub>2</sub><sup>+</sup> [M + H<sup>+</sup>]: 417.1598; found: 417.1600.

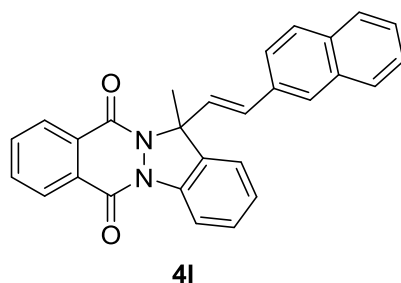

**(E)-13-methyl-13-(2-(naphthalen-2-yl)vinyl)-13H-indazolo[1,2-b]phthalazine-6,11-dione**

Compound **4l** was isolated as a yellow solid (60.9mg, 73% yield). M.P.: 145-146 °C. <sup>1</sup>H NMR (600 MHz, CDCl<sub>3</sub>, ppm) δ 8.55 (d, *J* = 8.4 Hz, 1H), 8.47 - 8.42 (m, 1H), 8.40 - 8.36 (m, 1H), 7.92 (d, *J* = 7.8 Hz, 1H), 7.87 - 7.80 (m, 3H), 7.76 (d, *J* = 7.8 Hz, 1H), 7.61 (d, *J* = 7.2 Hz, 1H), 7.56 - 7.51 (m, 1H), 7.50 - 7.44 (m, 2H), 7.43 - 7.36 (m, 3H), 7.29 (d, *J* = 16.2 Hz, 1H), 6.94 (d, *J* = 15.6 Hz, 1H), 2.32 (s, 3H). <sup>13</sup>C NMR (150 MHz, CDCl<sub>3</sub>, ppm) δ 154.9, 154.9, 135.7, 133.6, 133.5, 133.3, 132.3, 131.8, 131.2, 129.6, 129.6, 129.5, 129.1, 128.5, 128.5, 127.5, 127.4, 126.3, 126.2, 125.8, 125.5, 124.4, 123.5, 122.8, 116.2, 71.8, 24.9. HRMS (ESI) *m/z* calcd for C<sub>28</sub>H<sub>21</sub>N<sub>2</sub>O<sub>2</sub><sup>+</sup> [M + H<sup>+</sup>]: 417.1598; found: 417.1593.

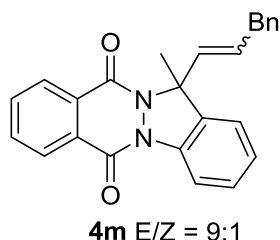

**13-methyl-13-(3-phenylprop-1-en-1-yl)-13H-indazolo[1,2-b]phthalazine-6,11-dione**

Compound **4m** was isolated as a colorless liquid (63.2mg, 83% yield). <sup>1</sup>H NMR (600 MHz, CDCl<sub>3</sub>, ppm) δ 8.37 (d, *J* = 8.4 Hz, 1H), 8.35 - 8.31 (m, 1H), 8.30 - 8.25 (m, 1H), 7.78 - 7.68 (m, 2H), 7.38 - 7.31 (m, 1H), 7.26 - 7.14 (m, 3H), 7.12 (d, *J* = 7.8 Hz,

1H), 7.09 (t,  $J = 7.8$  Hz, 1H), 7.07 - 6.98 (m, 2H), 6.28 (d,  $J = 18.0$  Hz, 0.1H), 6.19 (d,  $J = 15.6$  Hz, 0.9H), 5.78 - 5.57 (m, 1H), 3.44 - 3.22 (m, 2H), 2.04 (s, 2.7H), 2.02 (s, 0.3H).  $^{13}\text{C}$  NMR (150 MHz,  $\text{CDCl}_3$ , ppm)  $\delta$  155.3, 154.7, 154.6, 139.5, 136.8, 135.5, 135.4, 135.0, 133.4, 133.4, 133.1, 132.1, 132.1, 131.4, 131.4, 129.6, 129.5, 129.4, 129.3, 129.3, 128.5, 128.4, 128.3, 127.4, 127.3, 127.3, 127.3, 127.2, 126.2, 126.2, 126.1, 126.0, 122.7, 122.6, 121.3, 116.0, 115.9, 72.3, 71.4, 41.1, 38.4, 25.2, 24.6. **HRMS (ESI)**  $m/z$  calcd for  $\text{C}_{25}\text{H}_{21}\text{N}_2\text{O}_2^+$  [ $\text{M} + \text{H}^+$ ]: 381.1598; found: 381.1598.

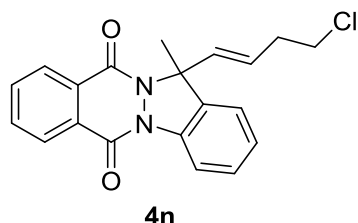

**(E)-13-(4-chlorobut-1-en-1-yl)-13-methyl-13H-indazolo[1,2-*b*]phthalazine-6,11-dione**

Compound **4n** was isolated as a colorless liquid (32.5mg, 46% yield).  $^1\text{H}$  NMR (400 MHz,  $\text{CDCl}_3$ , ppm)  $\delta$  8.38 (d,  $J = 8.1$  Hz, 1H), 8.36 - 8.31 (m, 1H), 8.30 - 8.22 (m, 1H), 7.83 - 7.74 (m, 2H), 7.37 (t,  $J = 7.6$  Hz, 1H), 7.24 (t,  $J = 7.5$  Hz, 1H), 7.17 (t,  $J = 8.0$  Hz, 1H), 6.21 (d,  $J = 15.7$  Hz, 1H), 5.68 - 5.52 (m, 1H), 3.55 - 3.39 (m, 2H), 2.60 - 2.37 (m, 2H), 2.04 (s, 3H).  $^{13}\text{C}$  NMR (100 MHz,  $\text{CDCl}_3$ , ppm)  $\delta$  154.7, 154.7, 135.3, 133.4, 133.2, 133.0, 131.7, 129.5, 129.4, 129.4, 128.4, 127.4, 127.2, 126.2, 122.7, 115.9, 71.2, 43.6, 35.1, 24.5. **HRMS (ESI)**  $m/z$  calcd for  $\text{C}_{20}\text{H}_{18}\text{ClN}_2\text{O}_2^+$  [ $\text{M} + \text{H}^+$ ]: 353.1051; found: 353.1059.

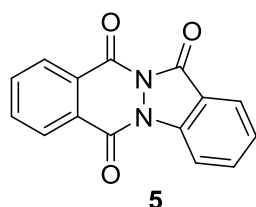

**13H-indazolo[1,2-*b*]phthalazine-6,11,13-trione**

Compound **5** was isolated as a yellow solid (34.9mg, 44% yield). M.P.: 209-210 °C.  $^1\text{H}$  NMR (400 MHz,  $\text{CDCl}_3$ , ppm)  $\delta$  8.51 (d,  $J = 8.3$  Hz, 1H), 8.46 - 8.40 (m, 1H), 8.39 - 8.31 (m, 1H), 8.00 (d,  $J = 7.8$  Hz, 1H), 7.91 - 7.82 (m, 4H), 7.82 - 7.73 (m, 1H), 7.42 (t,  $J = 7.5$  Hz, 1H).  $^{13}\text{C}$  NMR (100 MHz,  $\text{CDCl}_3$ , ppm)  $\delta$  158.1, 154.8, 153.9, 139.1, 136.6, 135.2, 134.7, 129.2, 128.9, 128.8, 128.3, 126.4, 125.4, 116.5, 116.2. **HRMS (ESI)**  $m/z$  calcd for  $\text{C}_{15}\text{H}_9\text{N}_2\text{O}_3^+$  [ $\text{M} + \text{H}^+$ ]: 265.0608; found: 265.0611.



## 8.2 Copies of NMR spectra

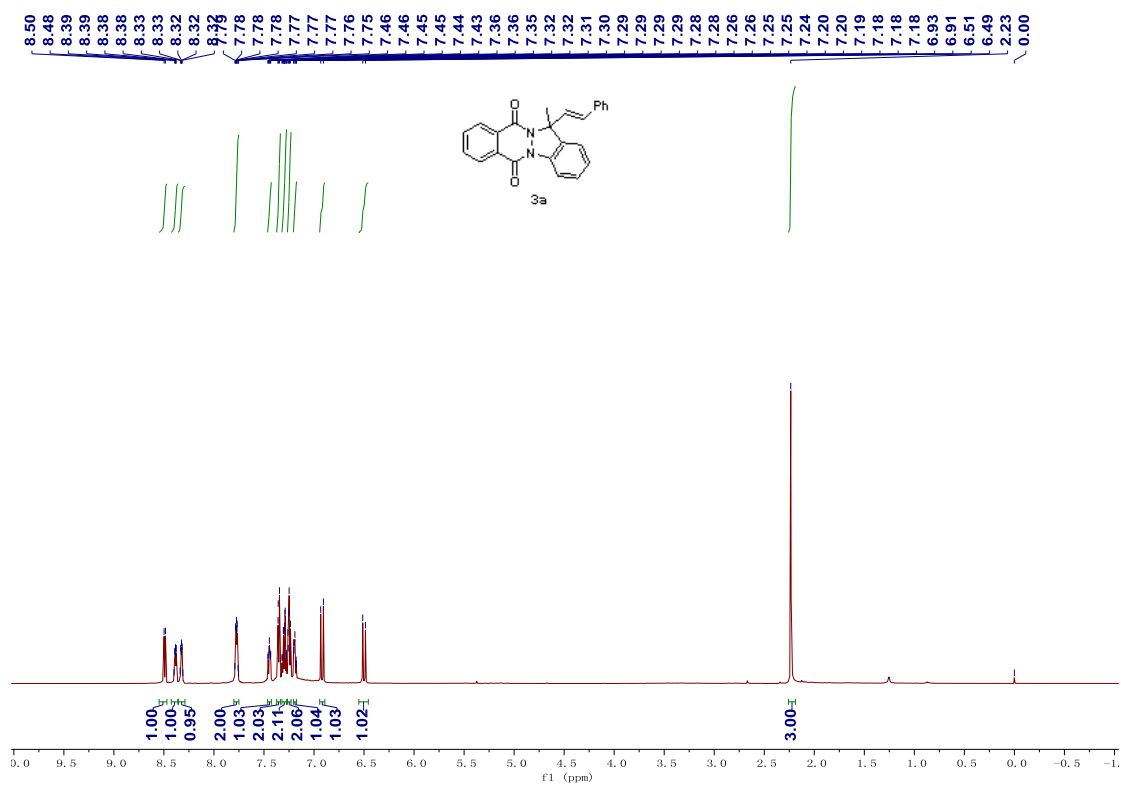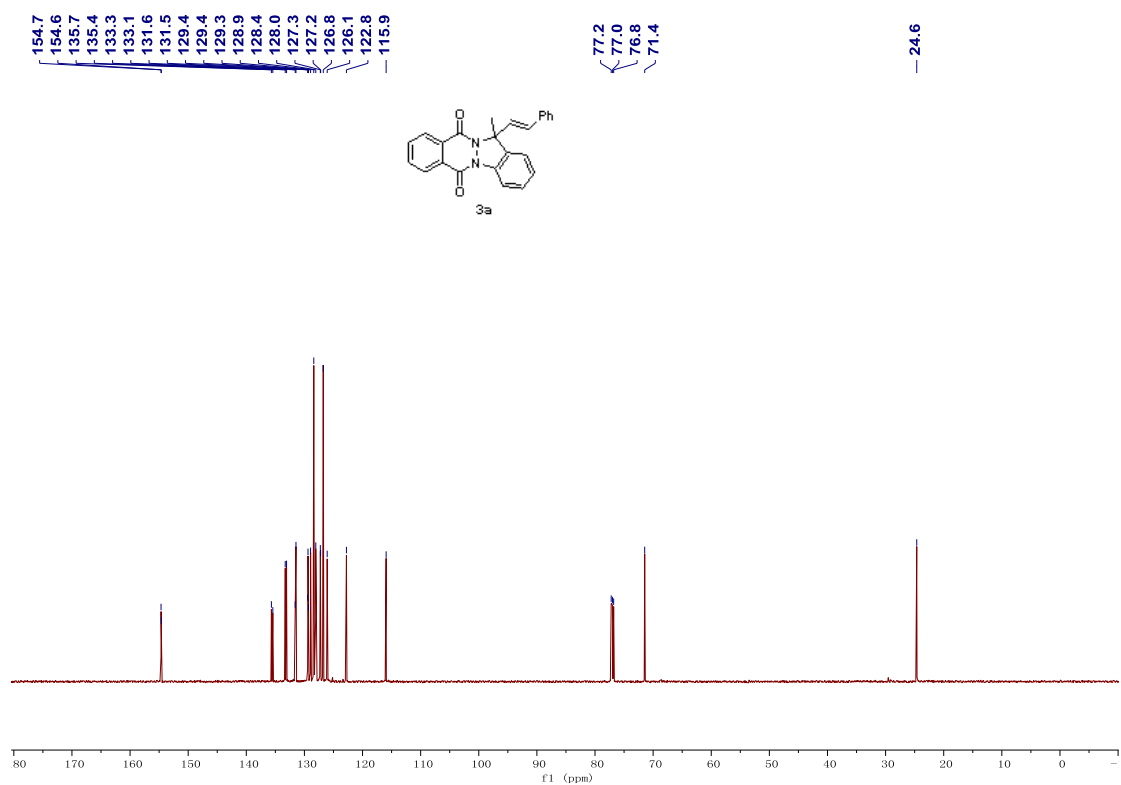

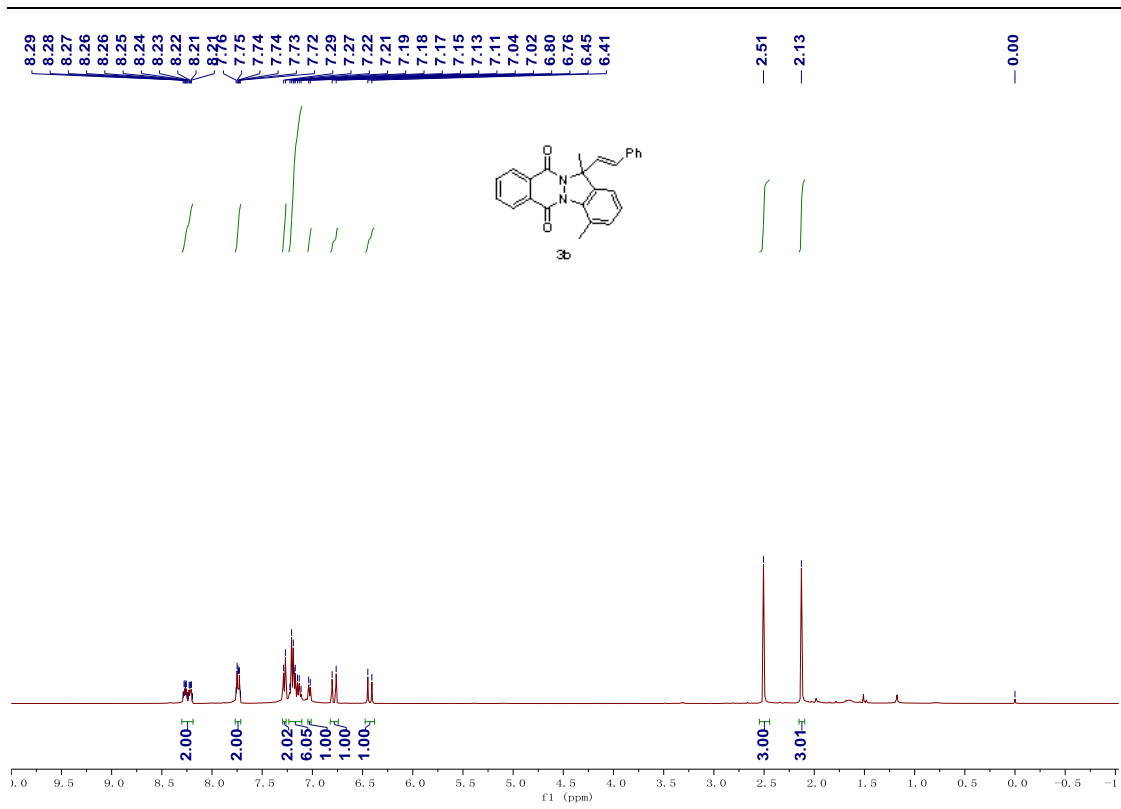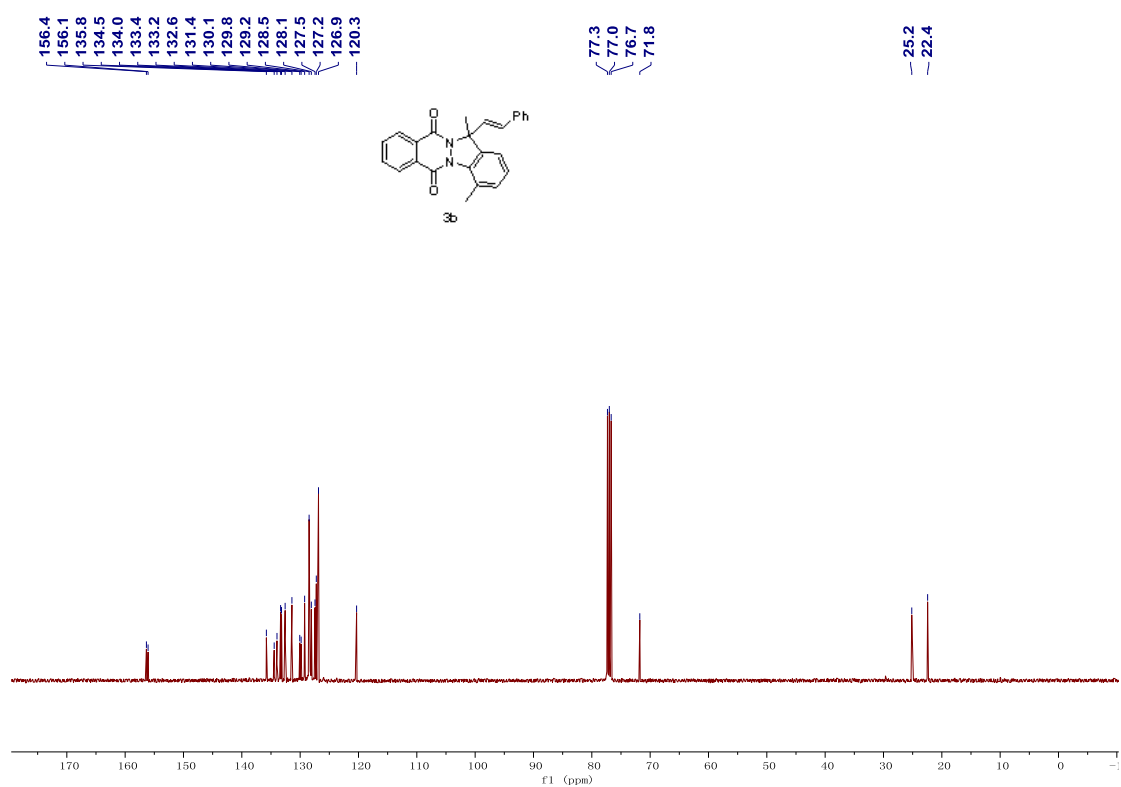

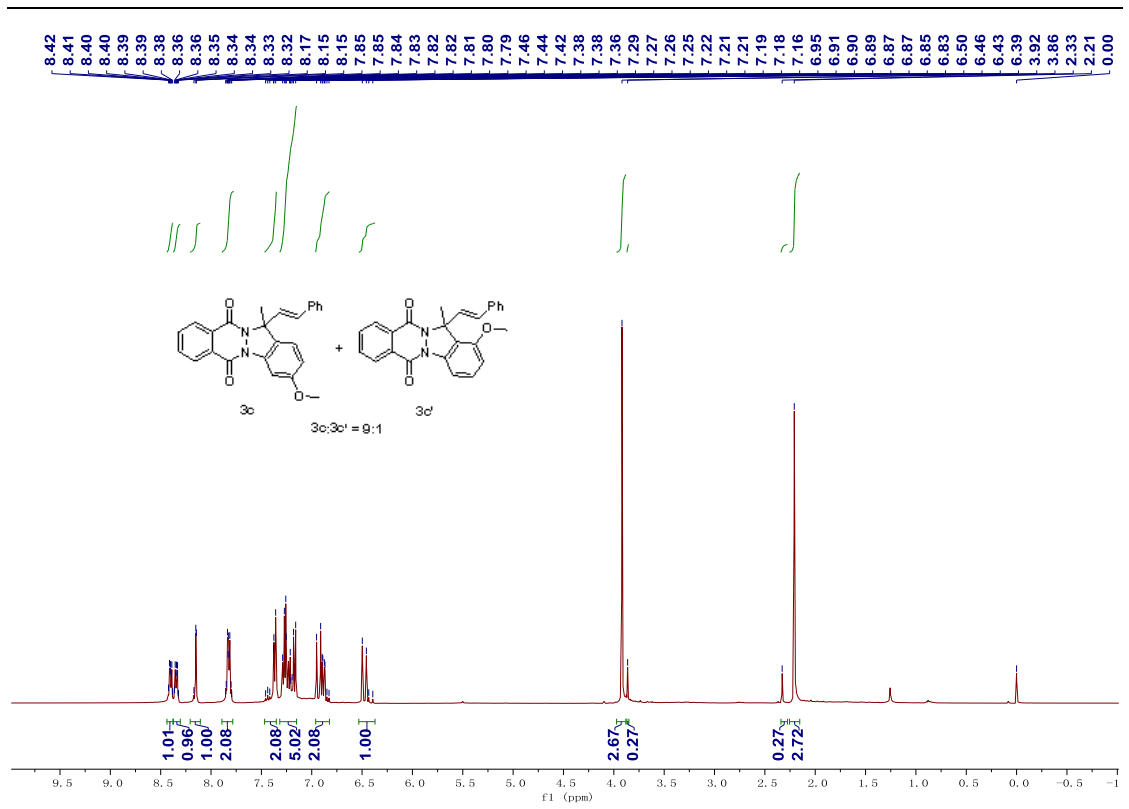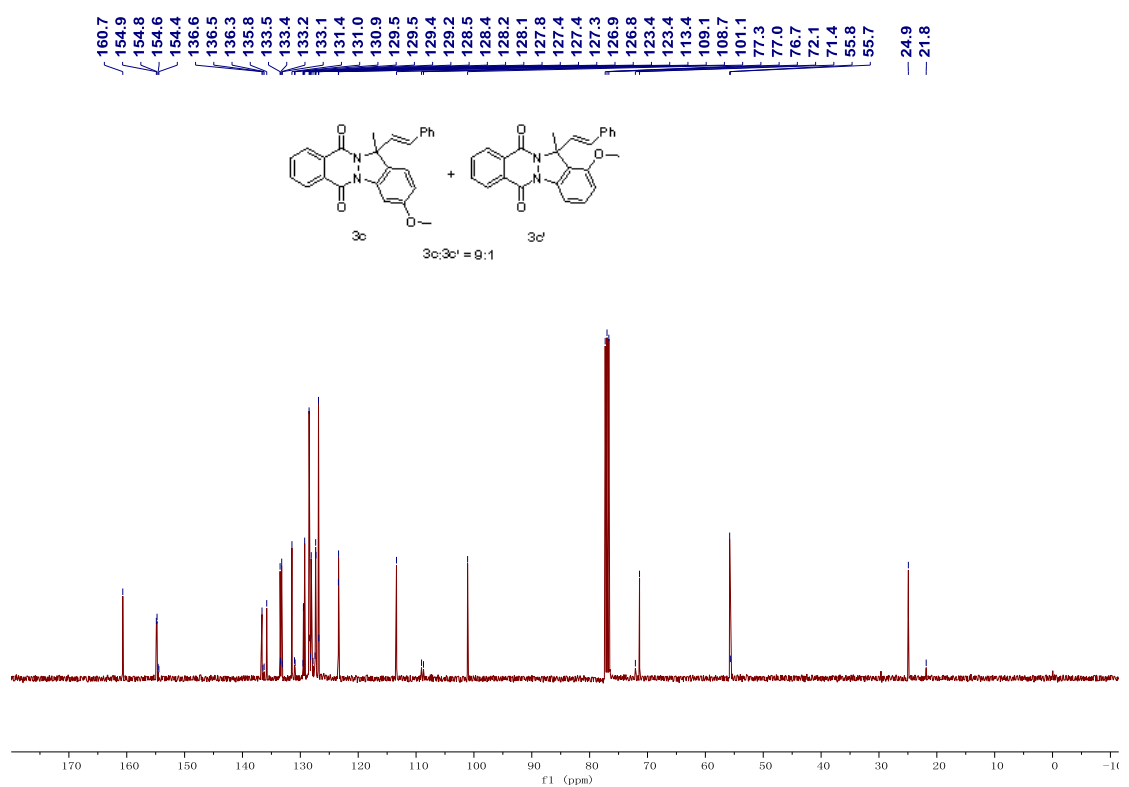

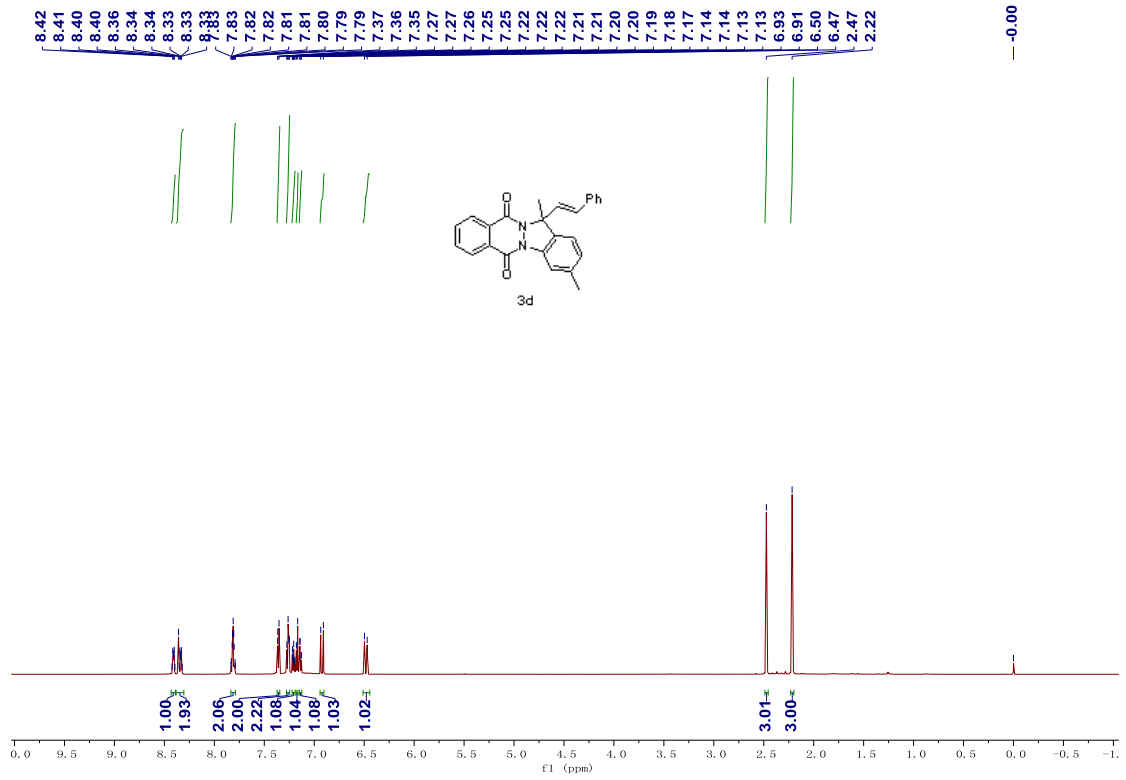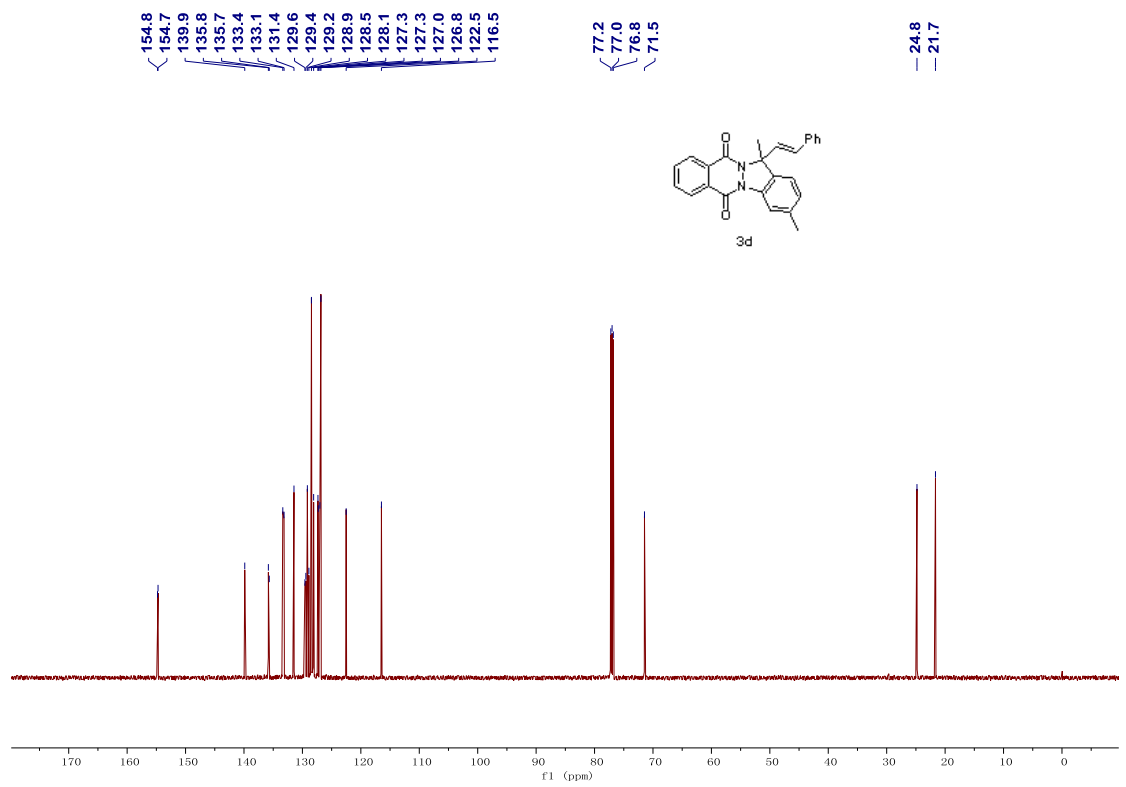

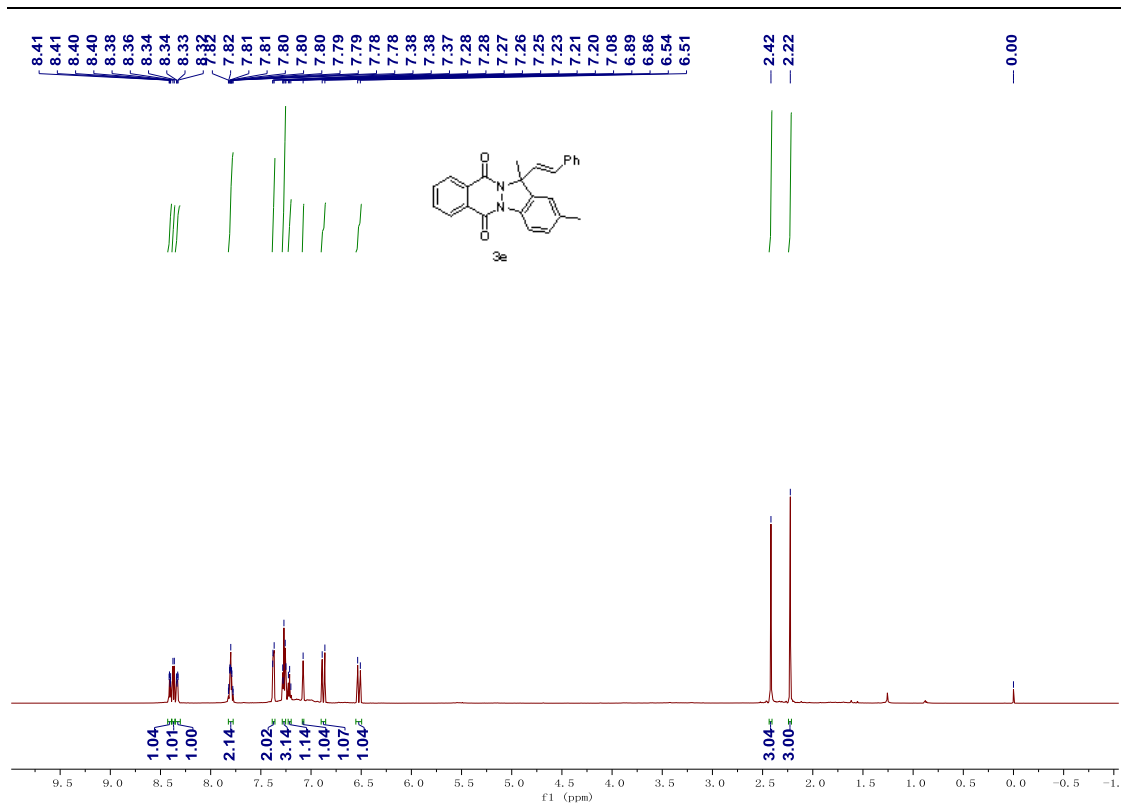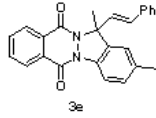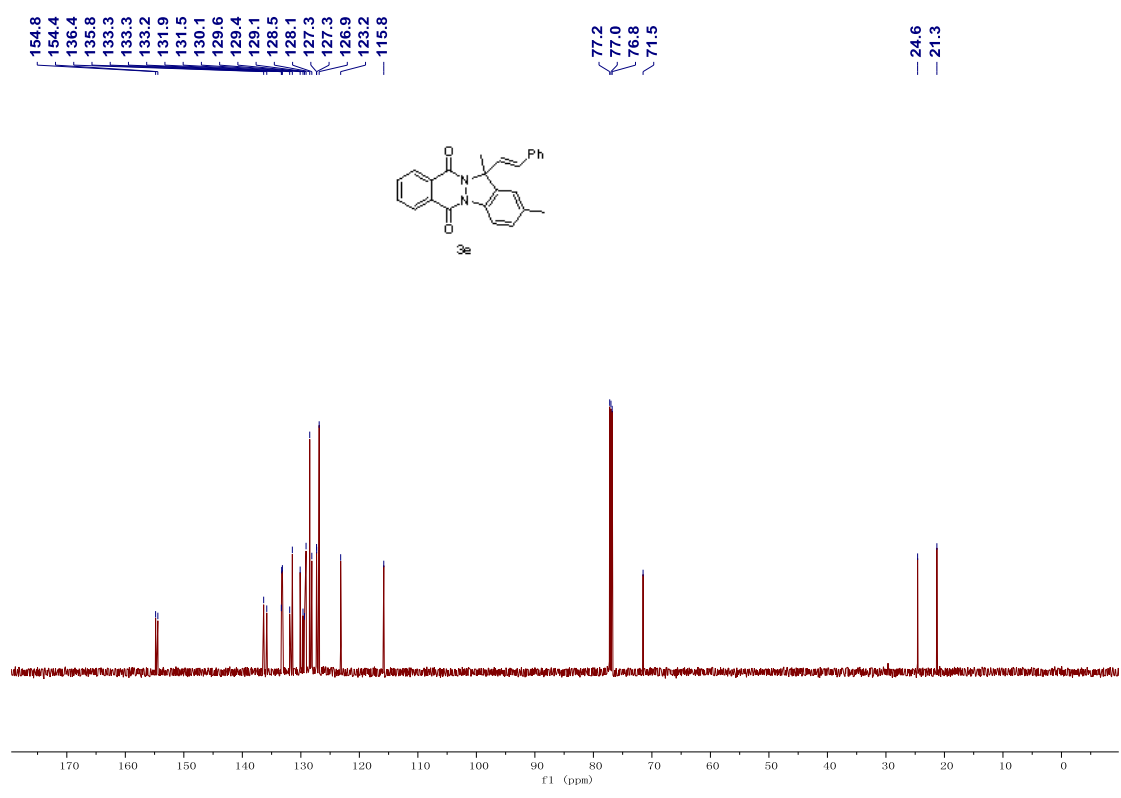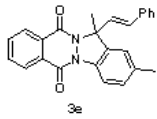

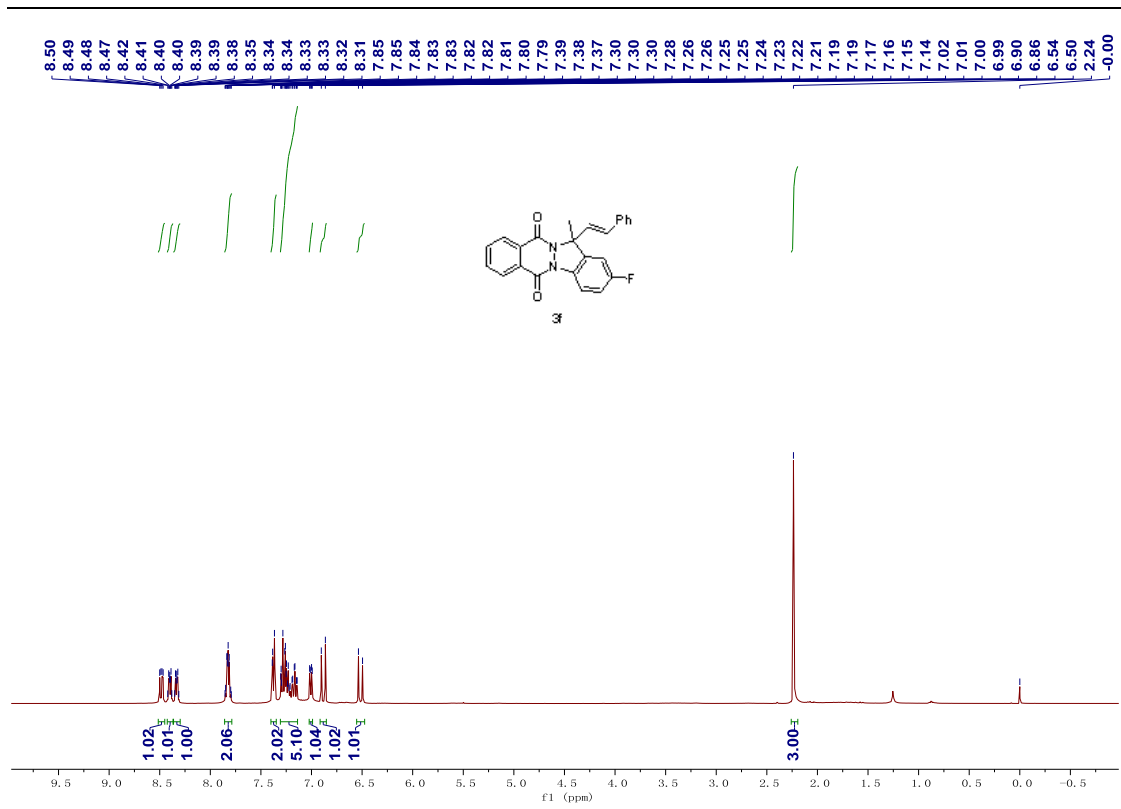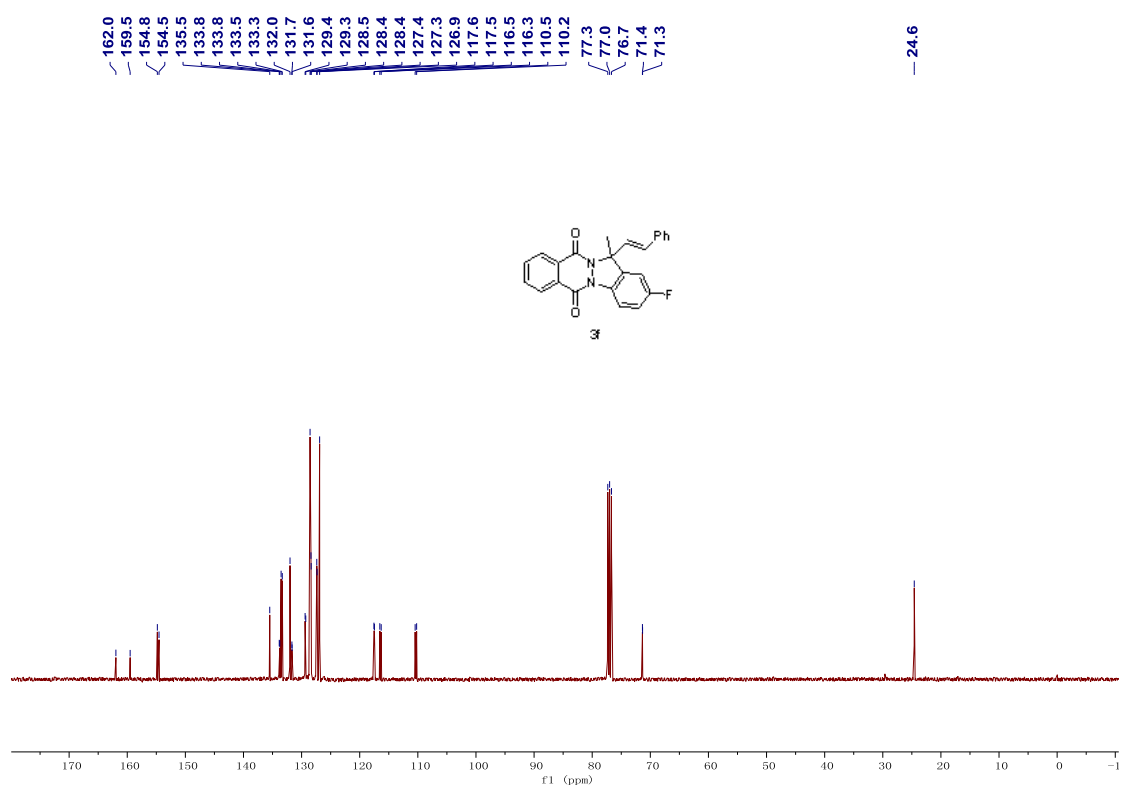

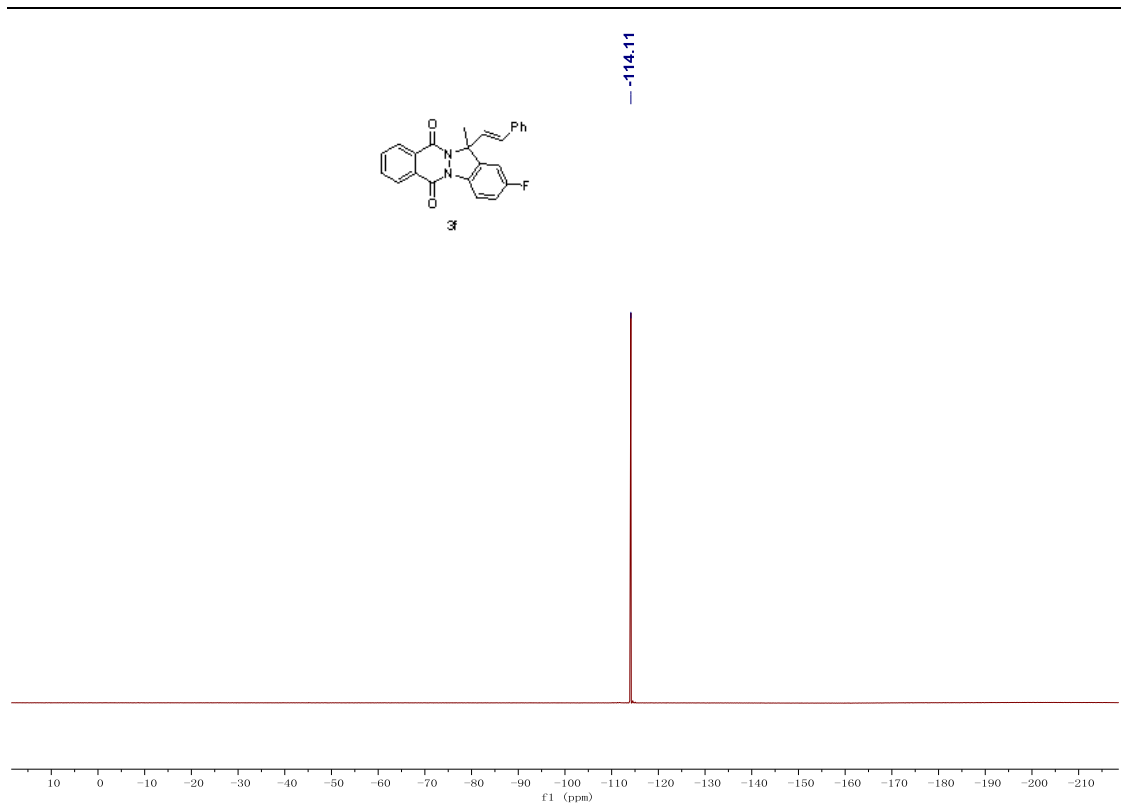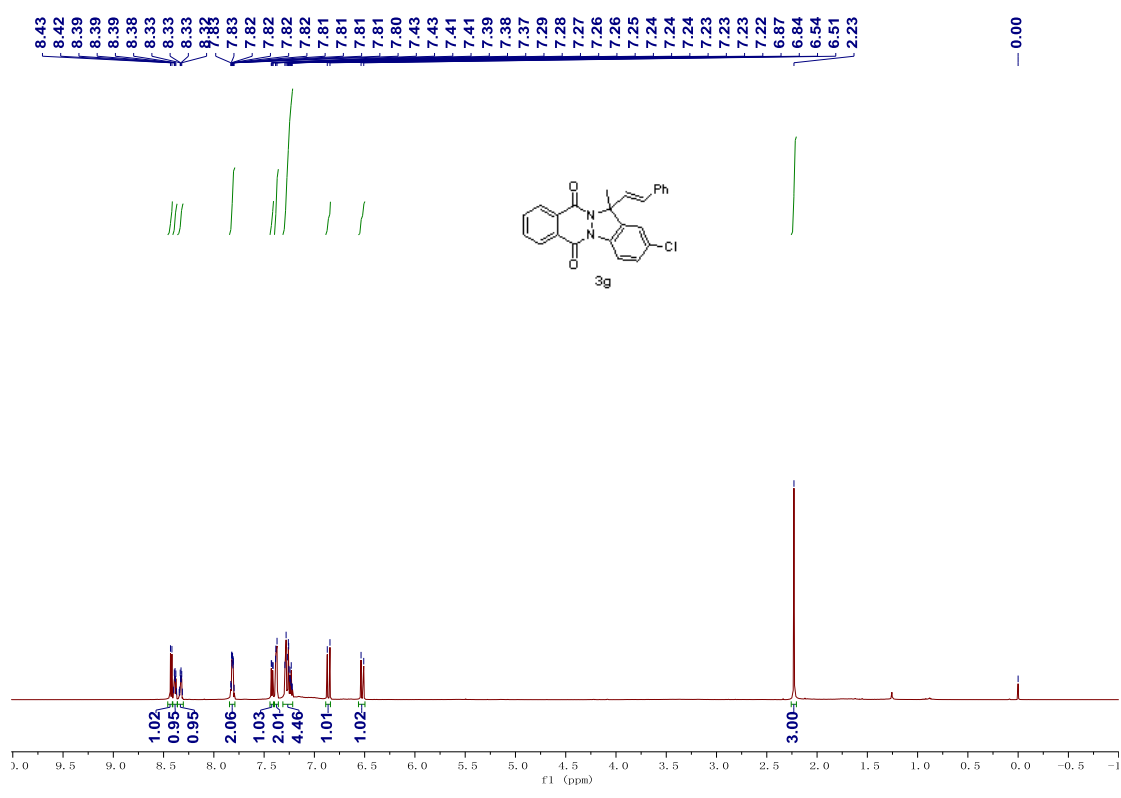

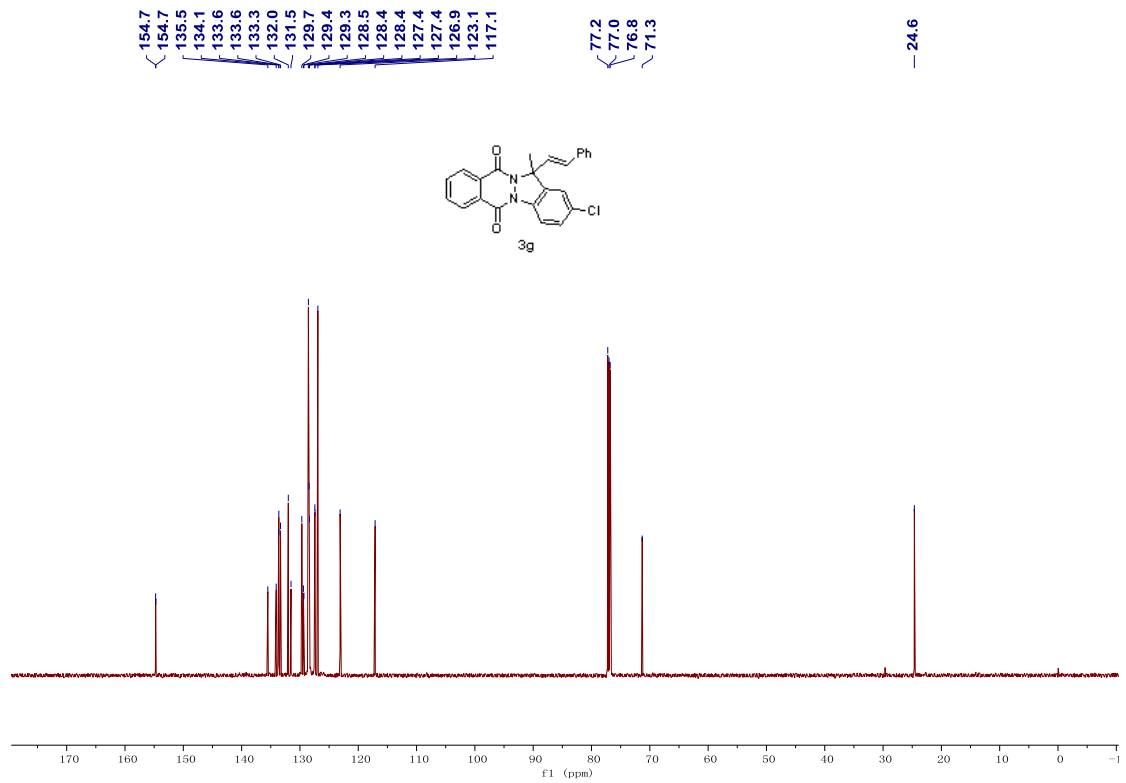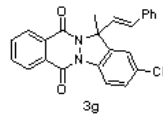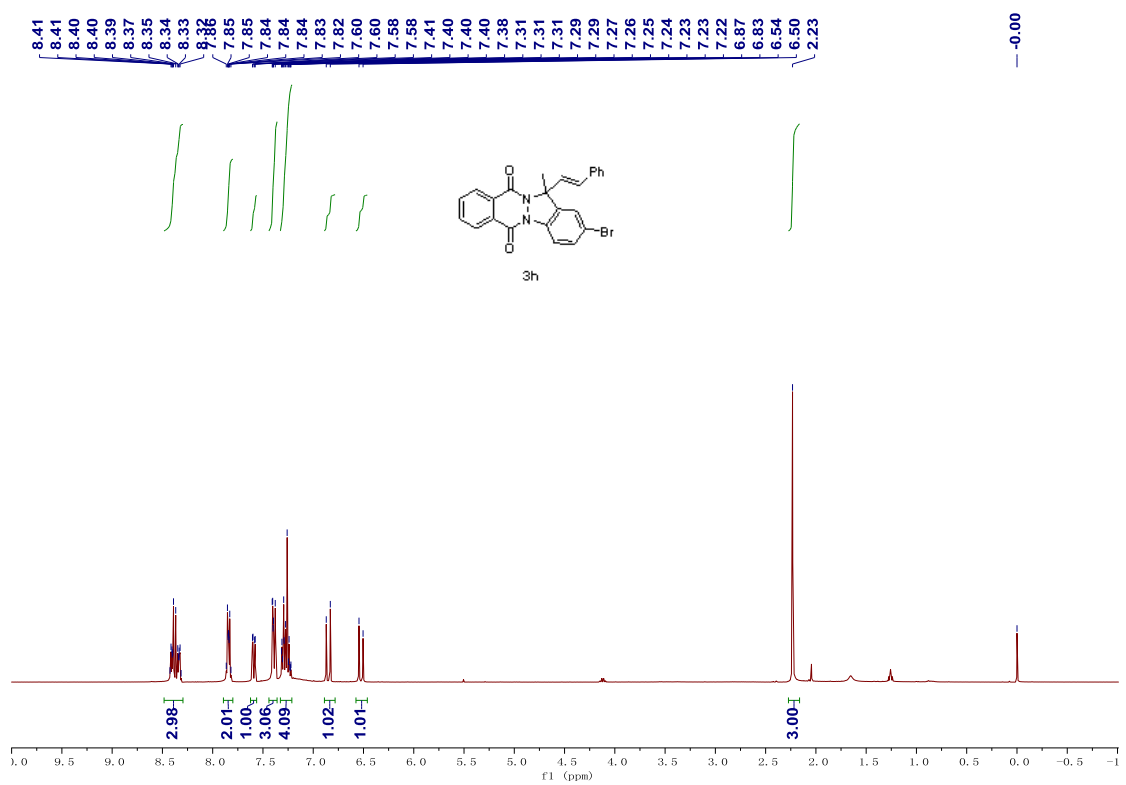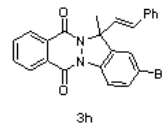



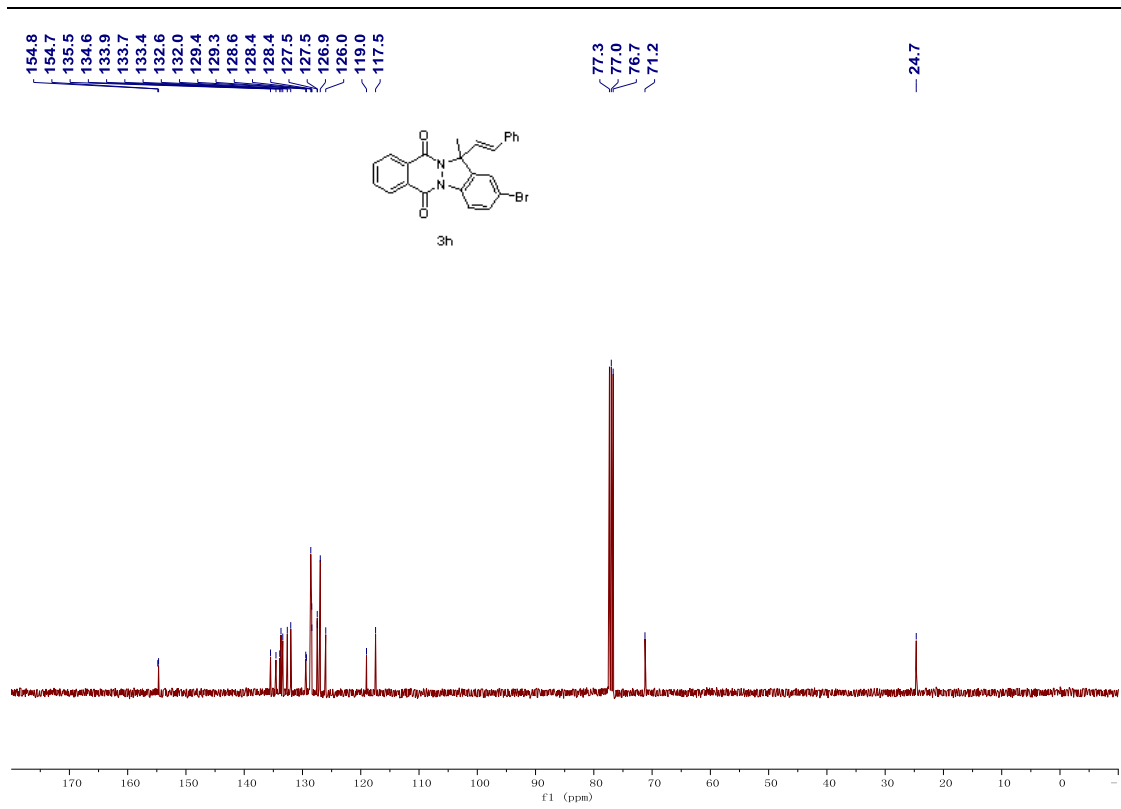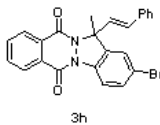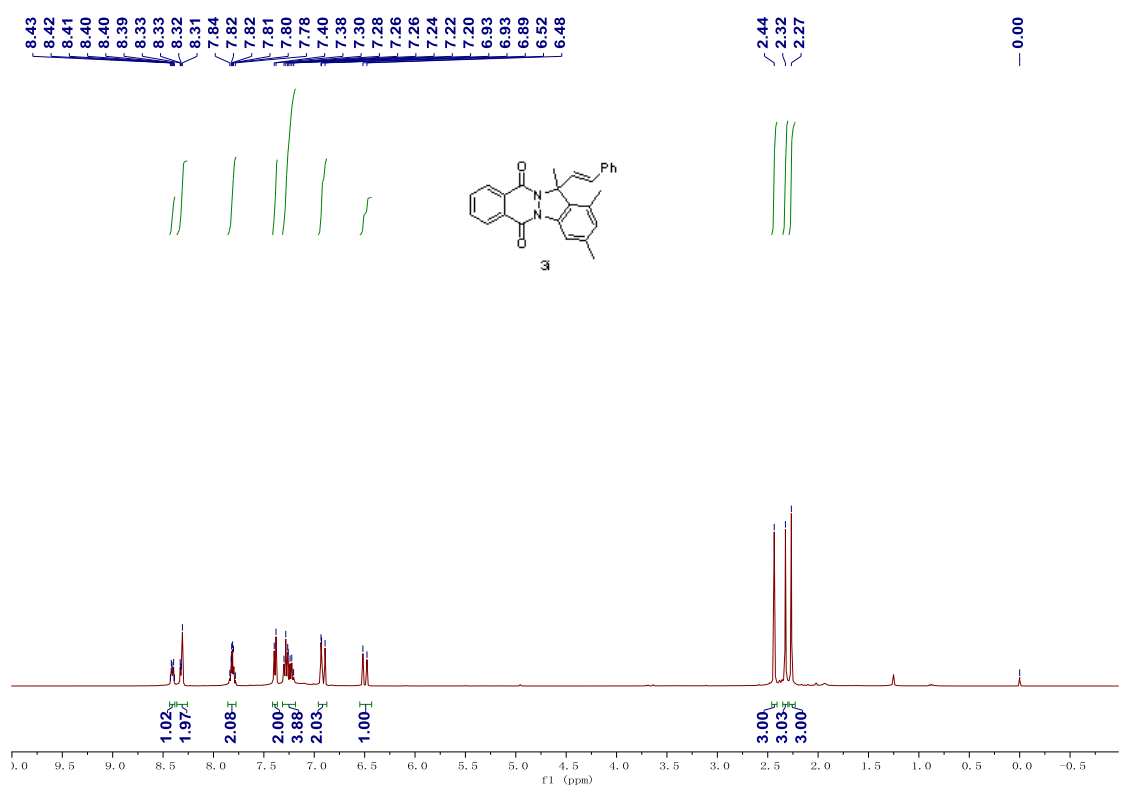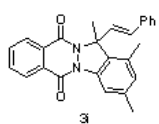

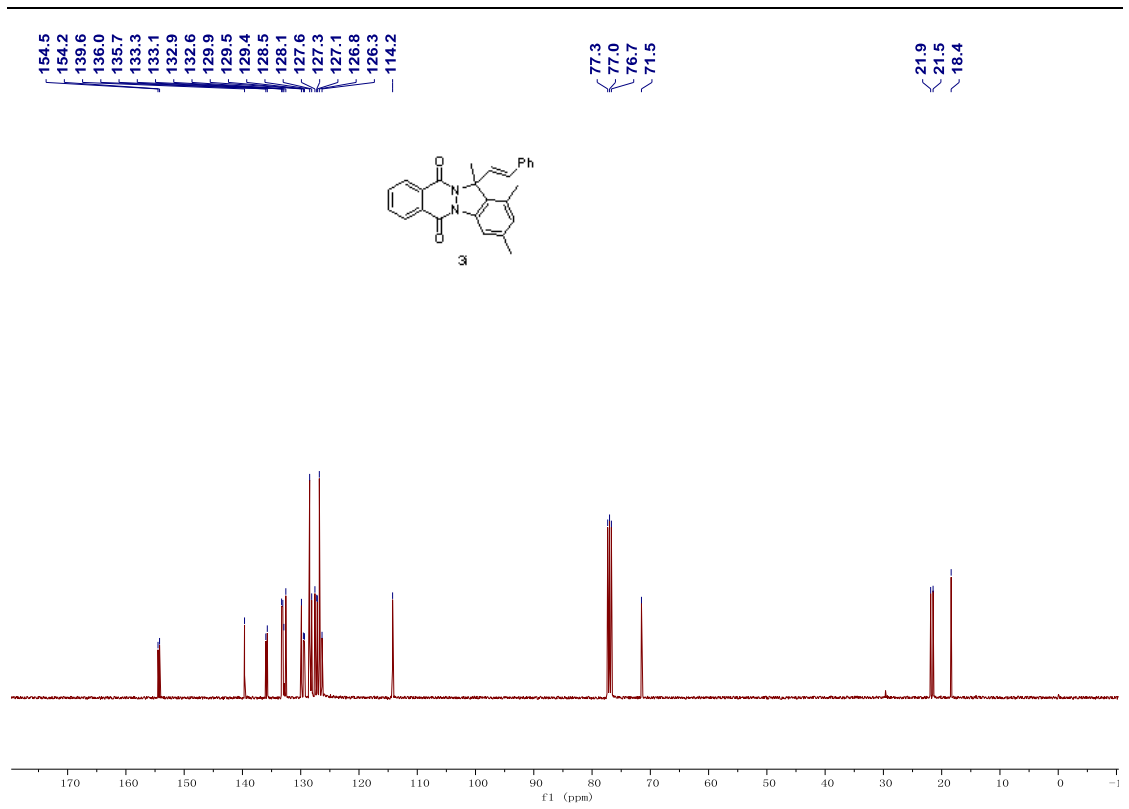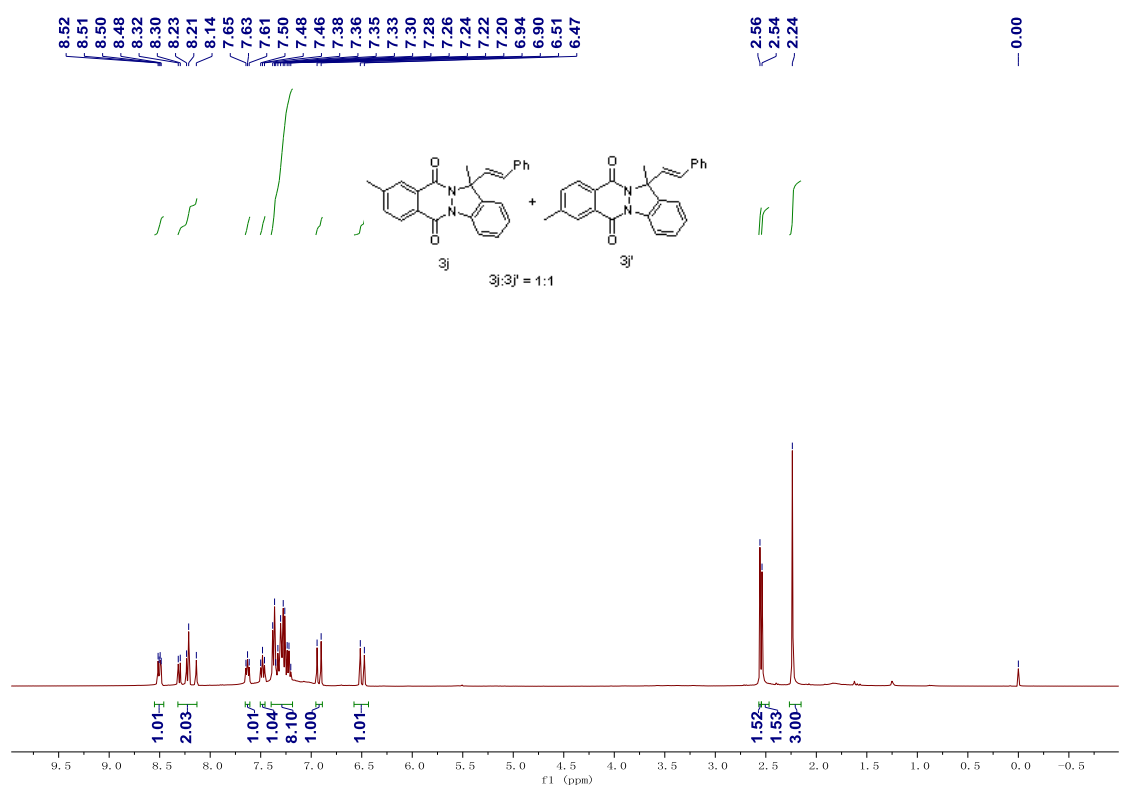

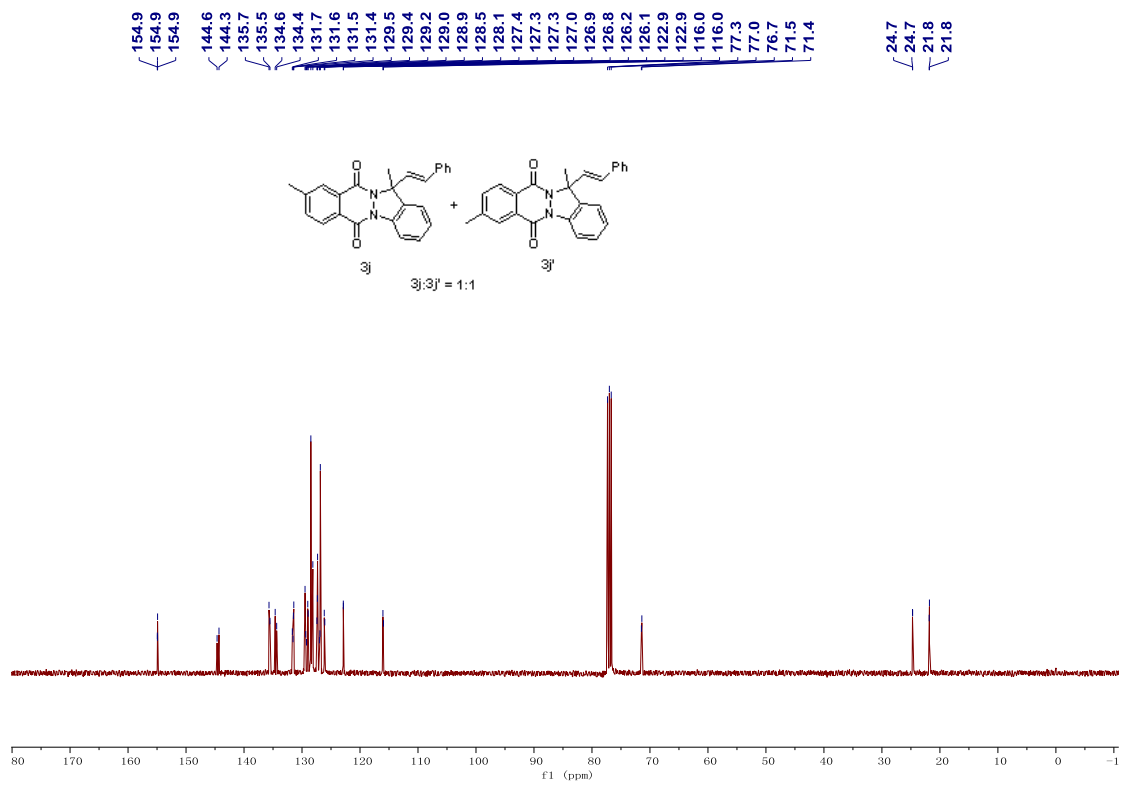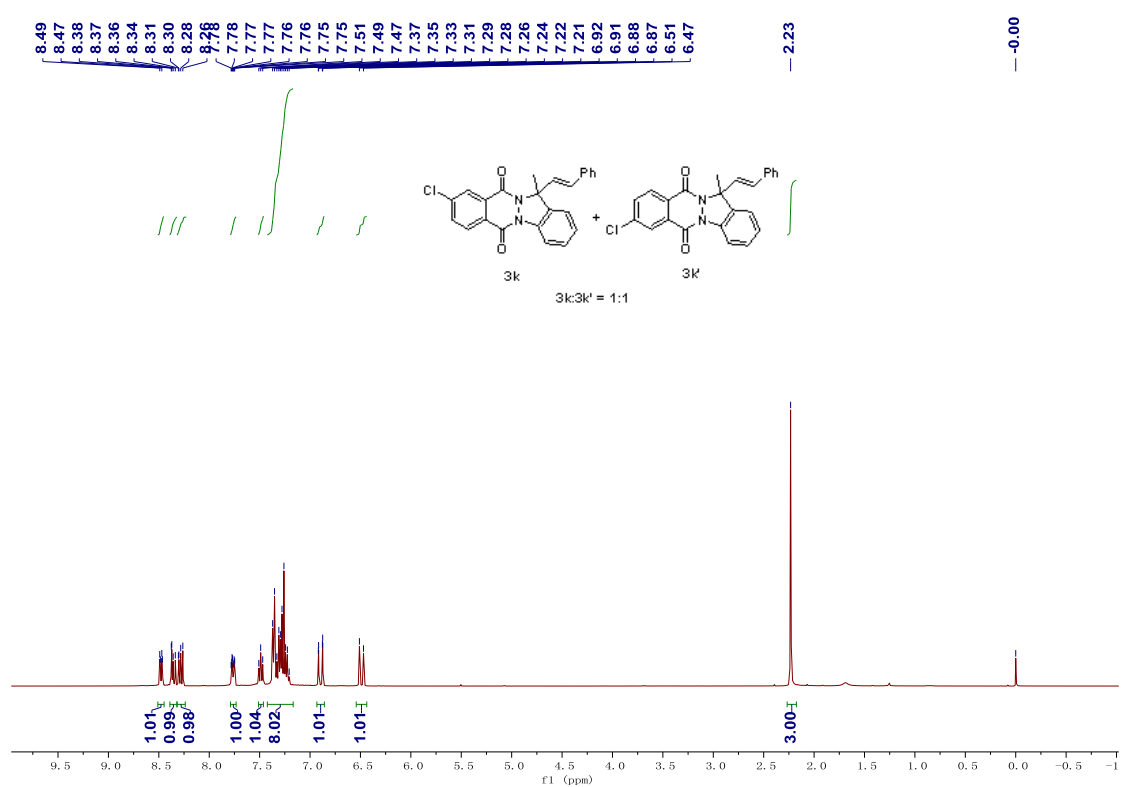

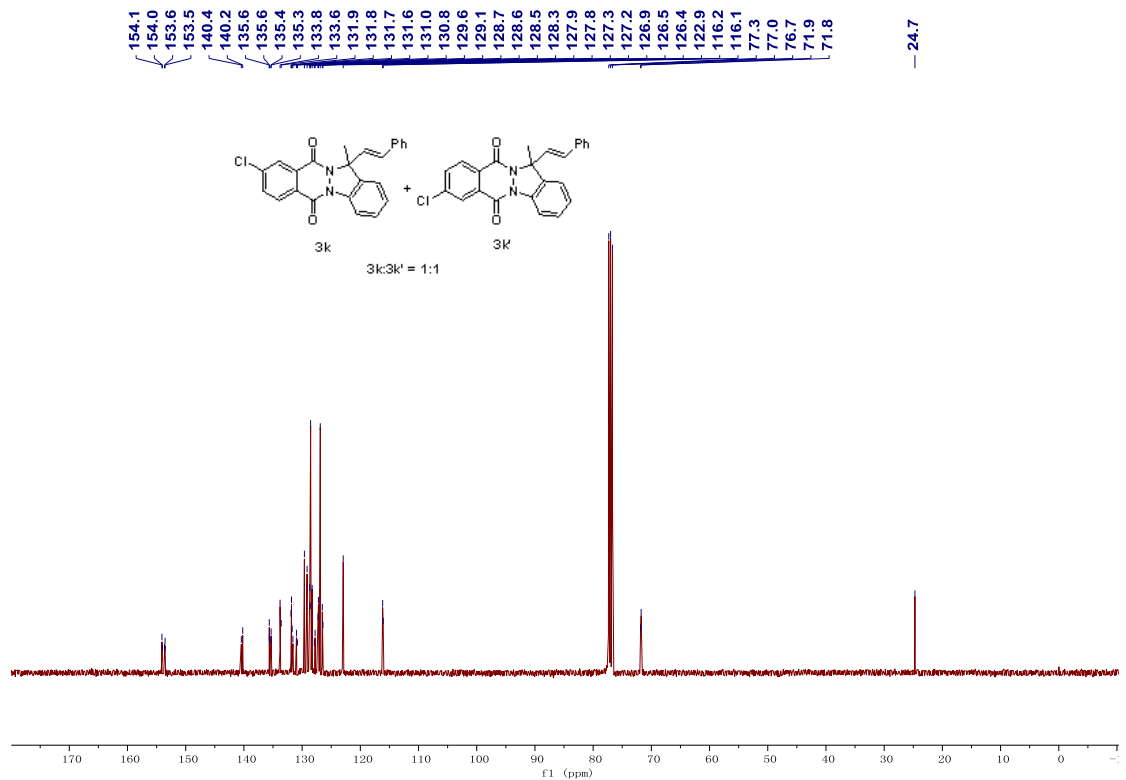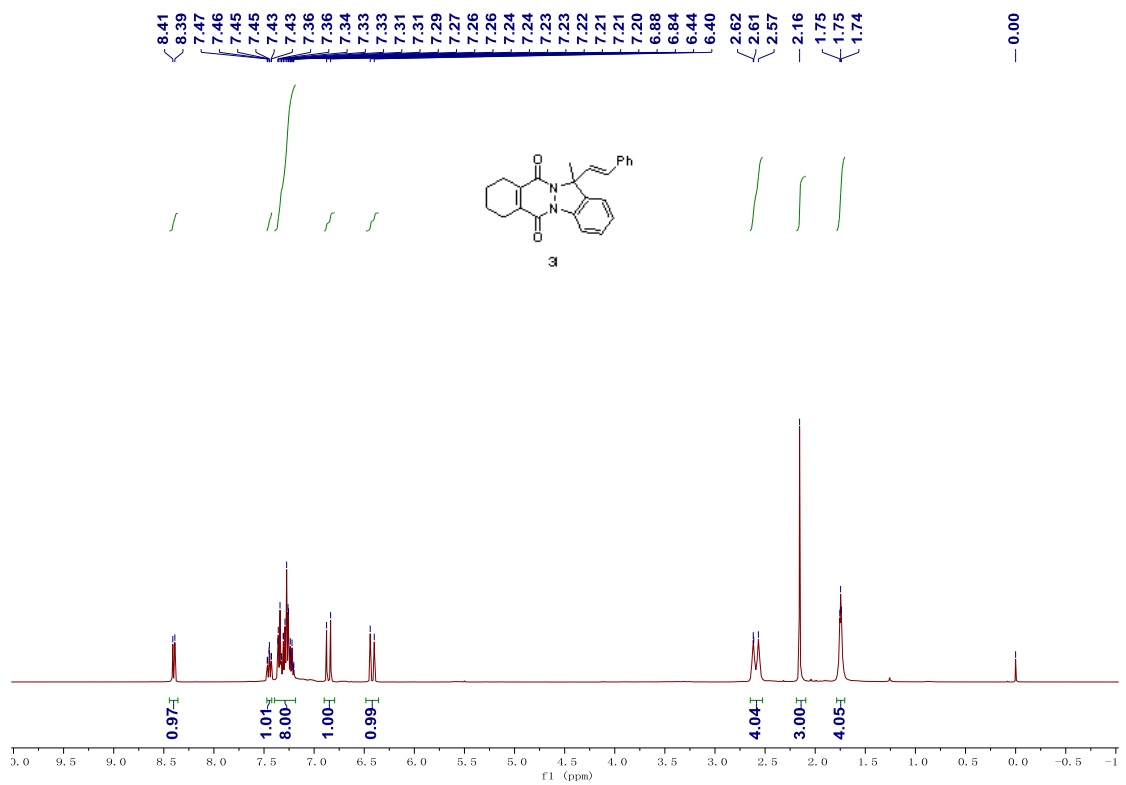

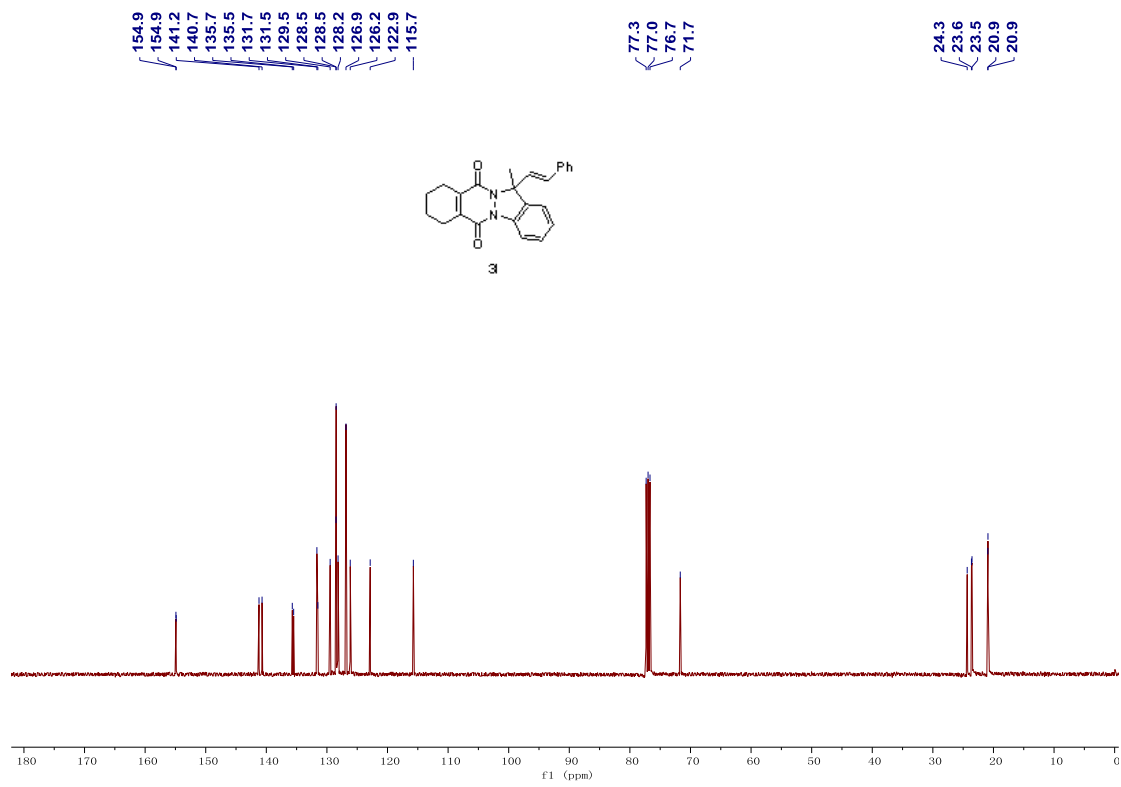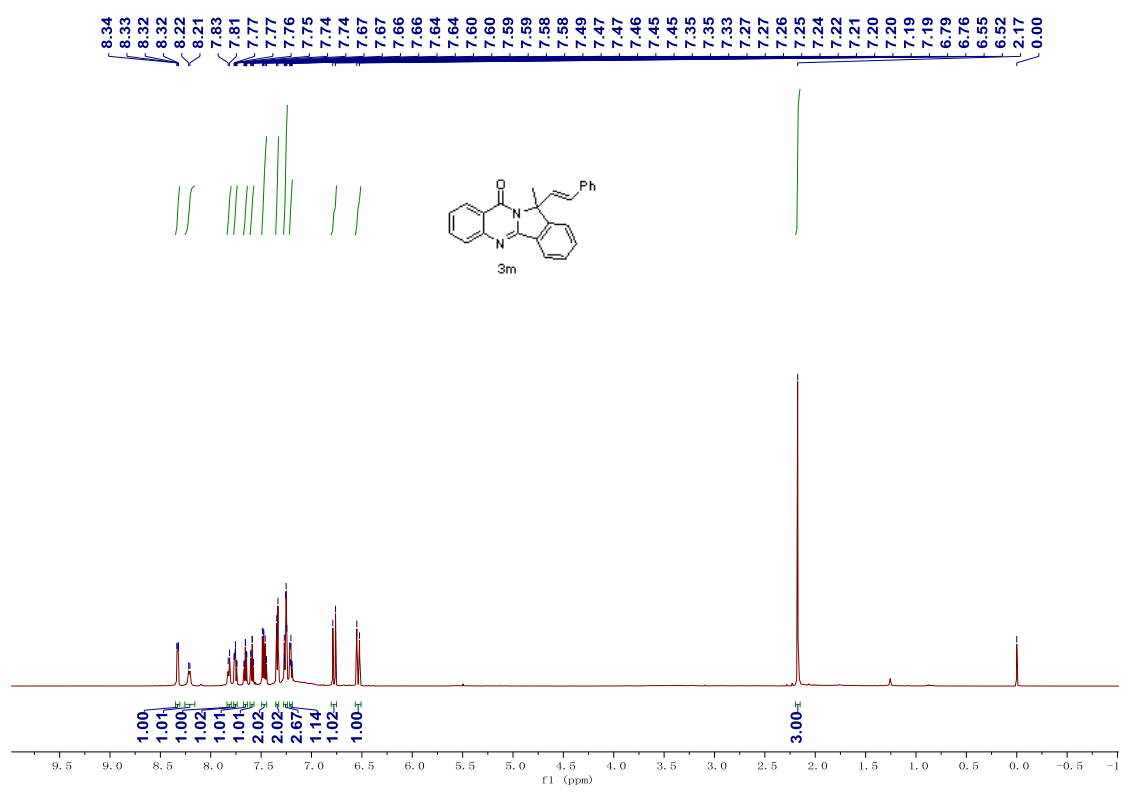

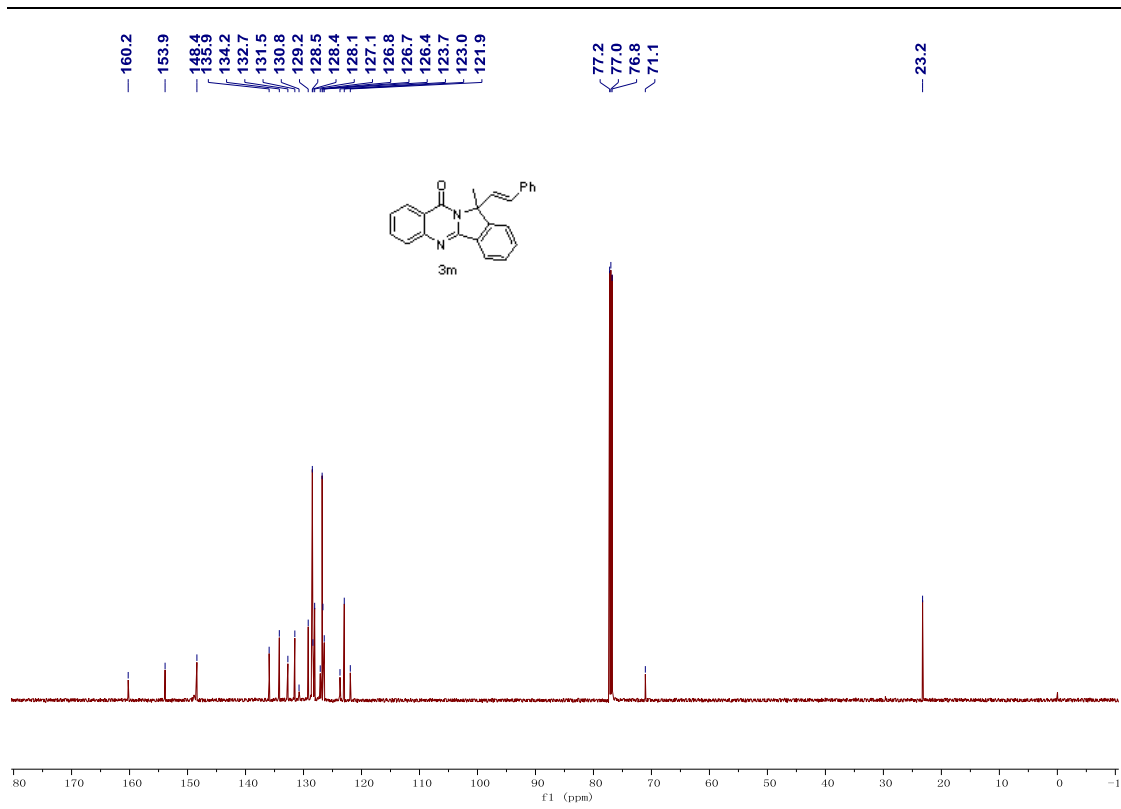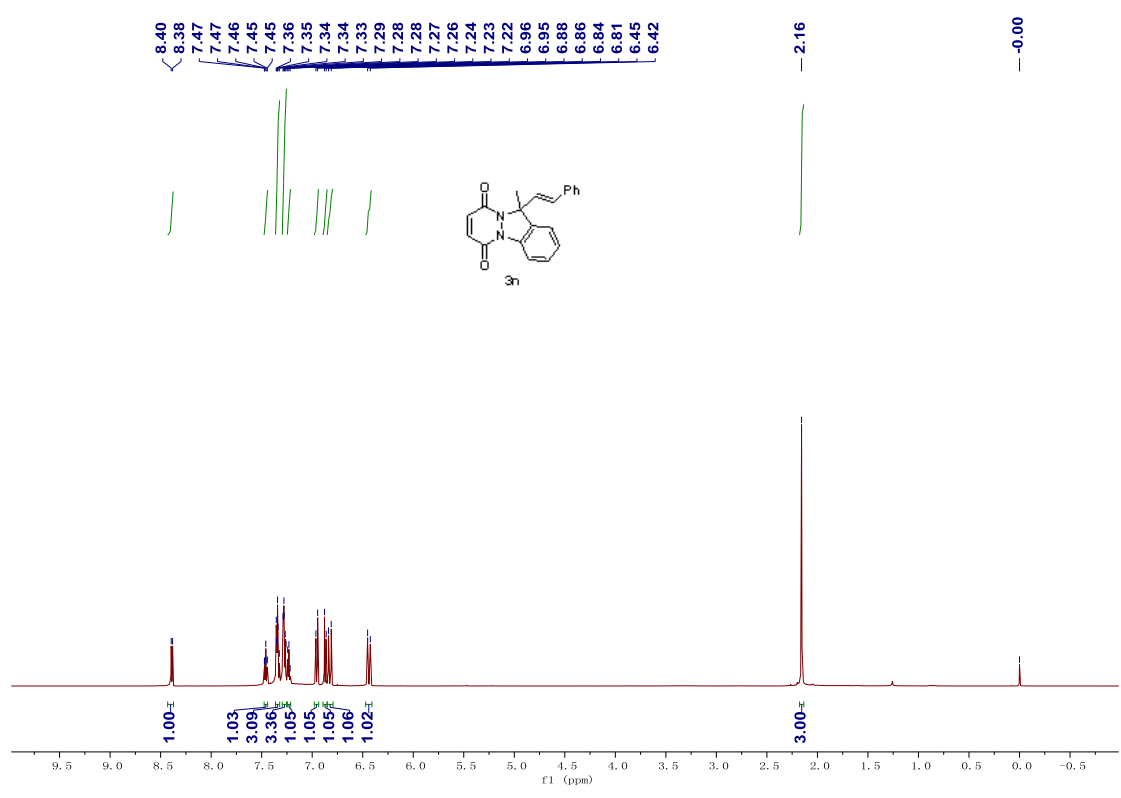

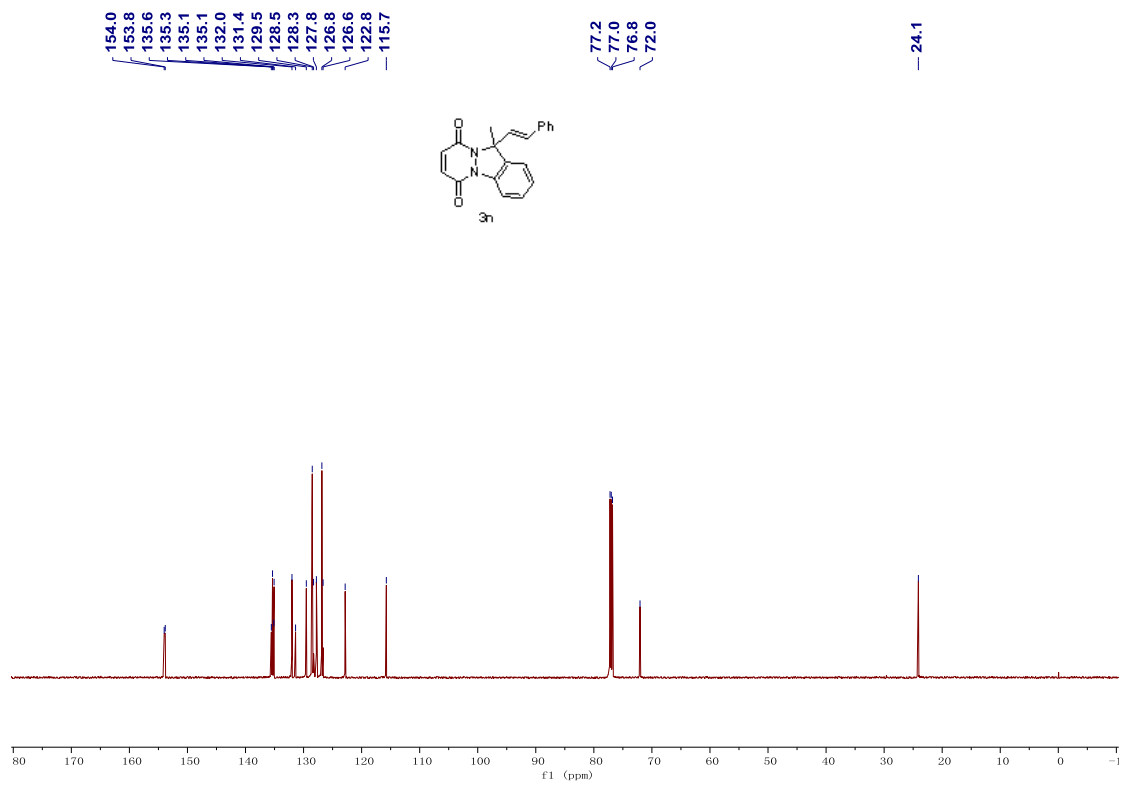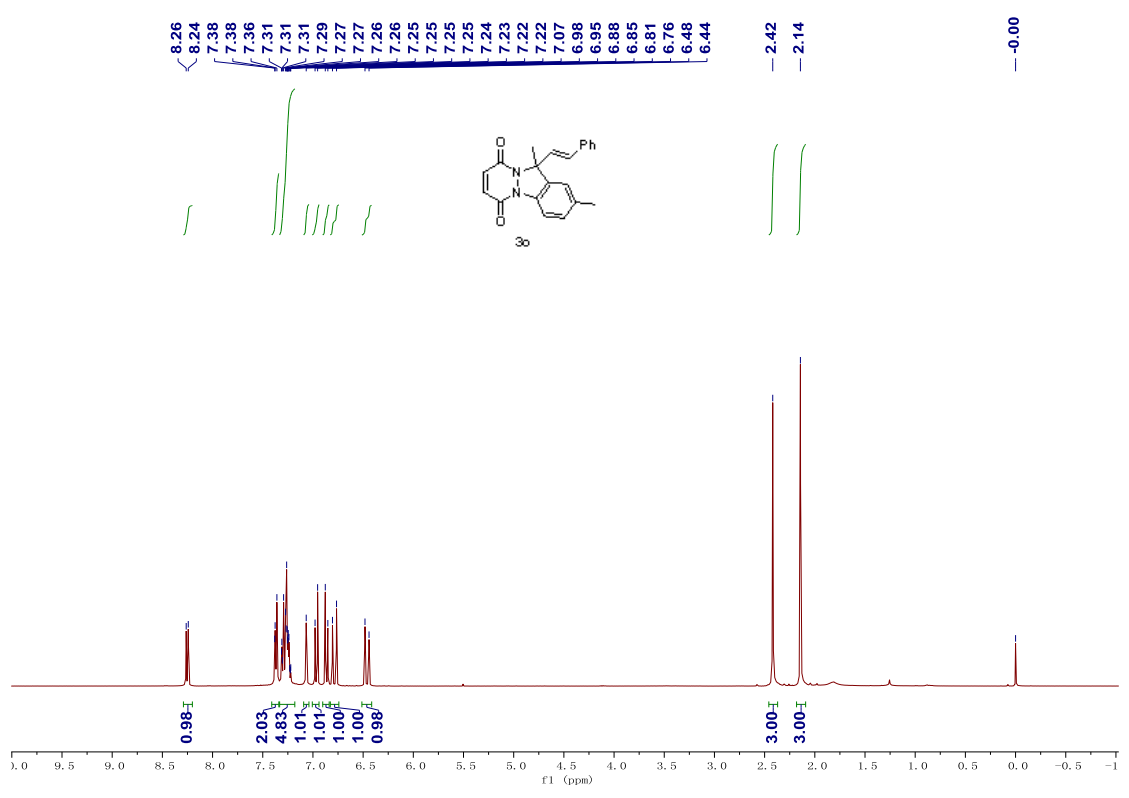

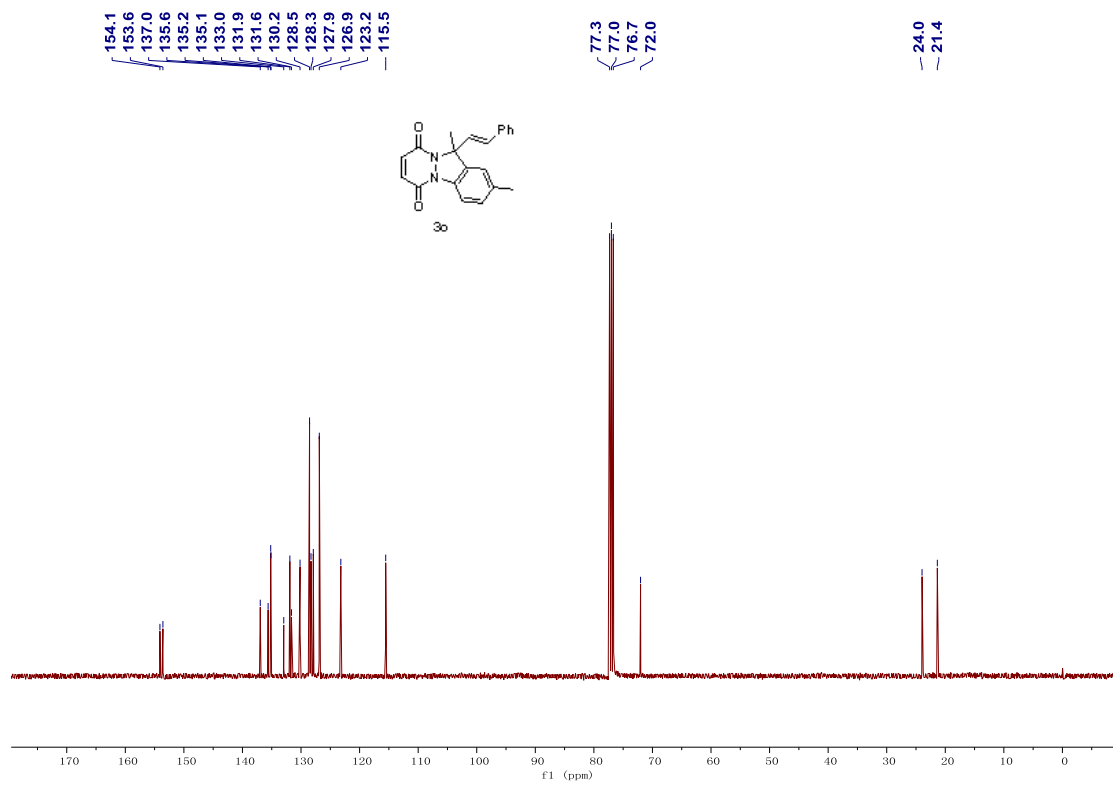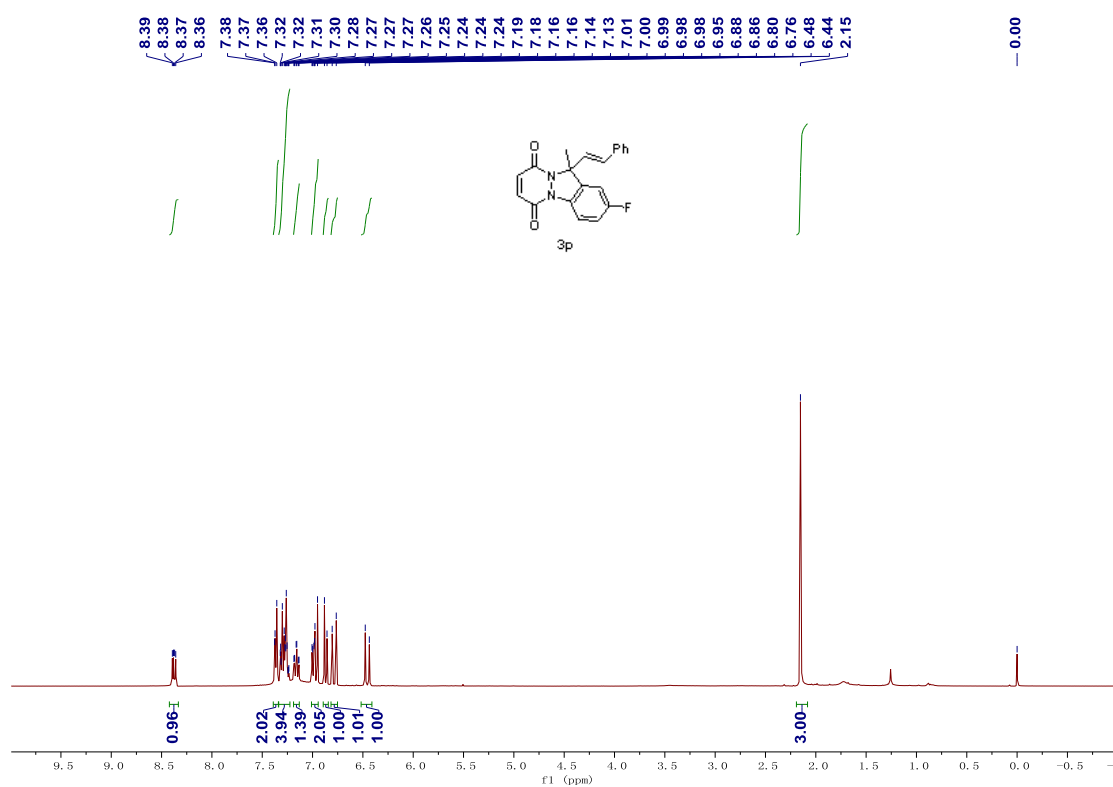



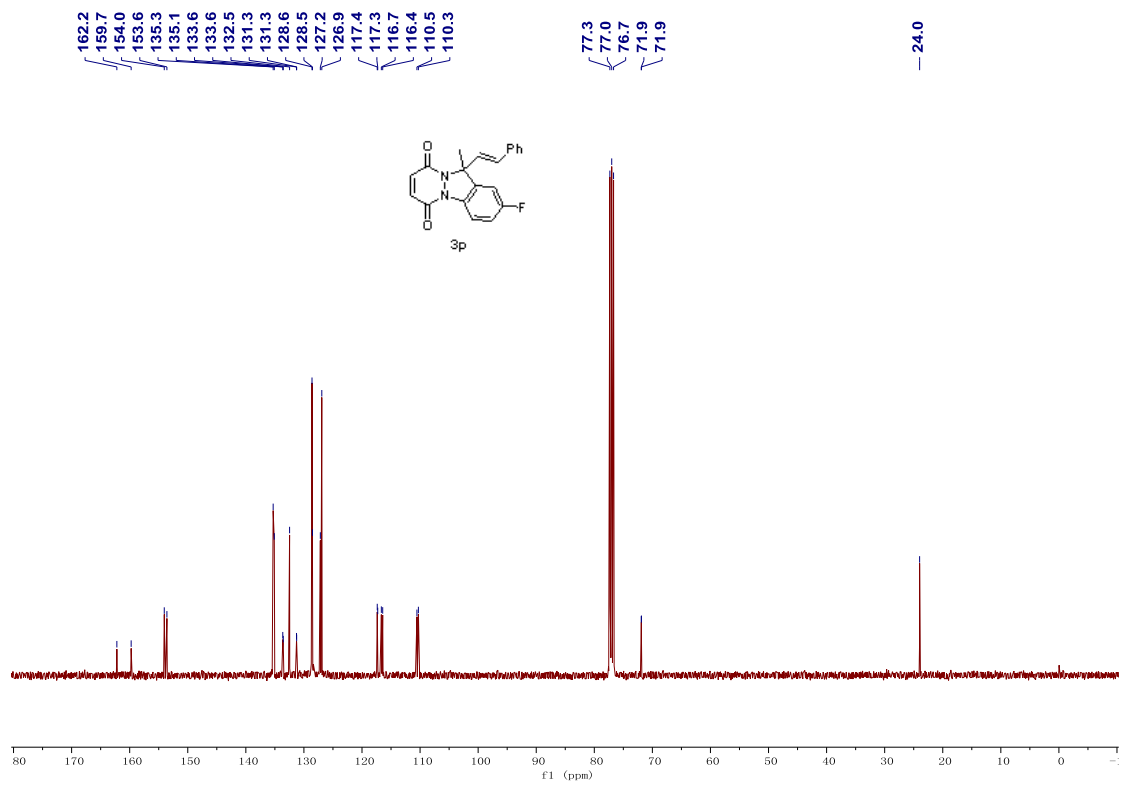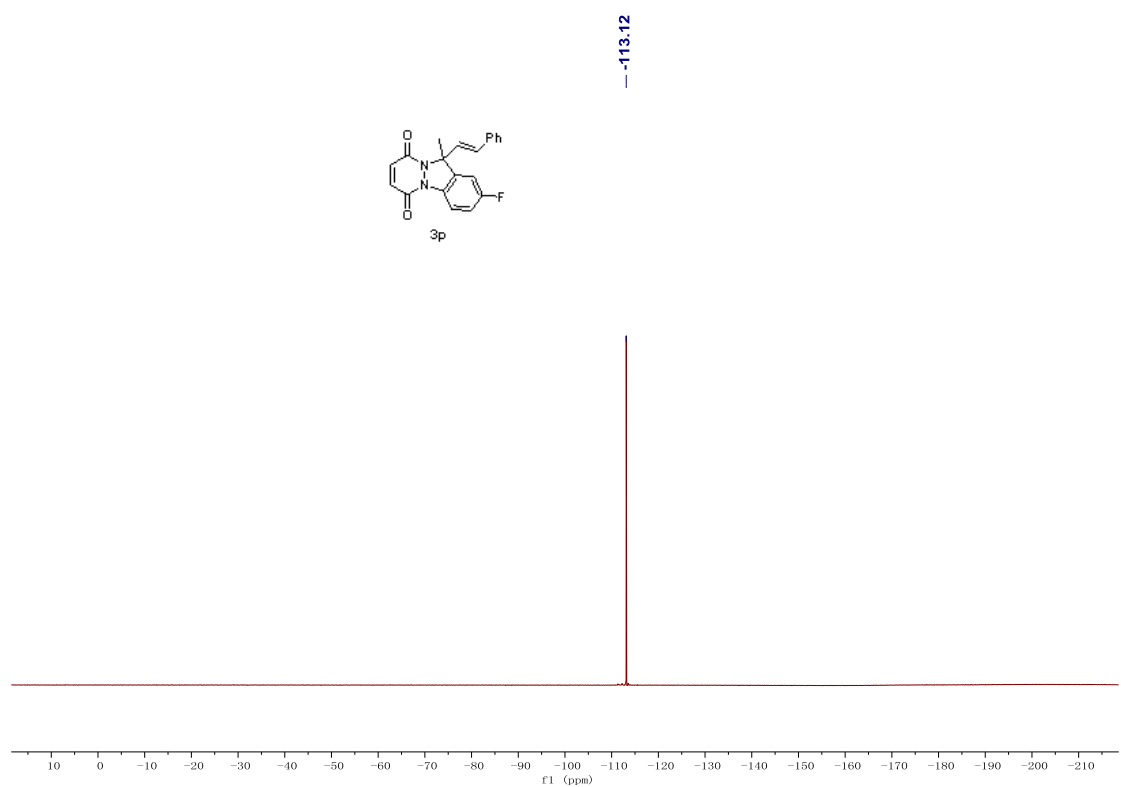

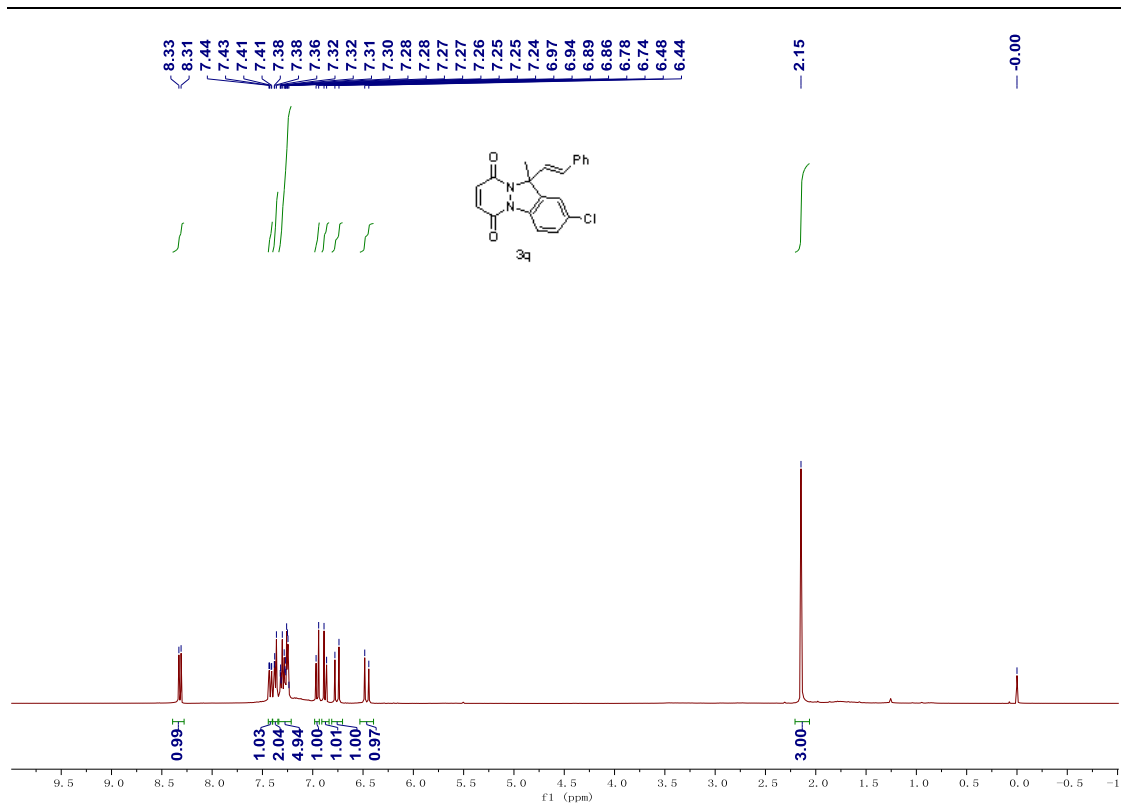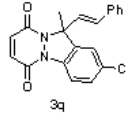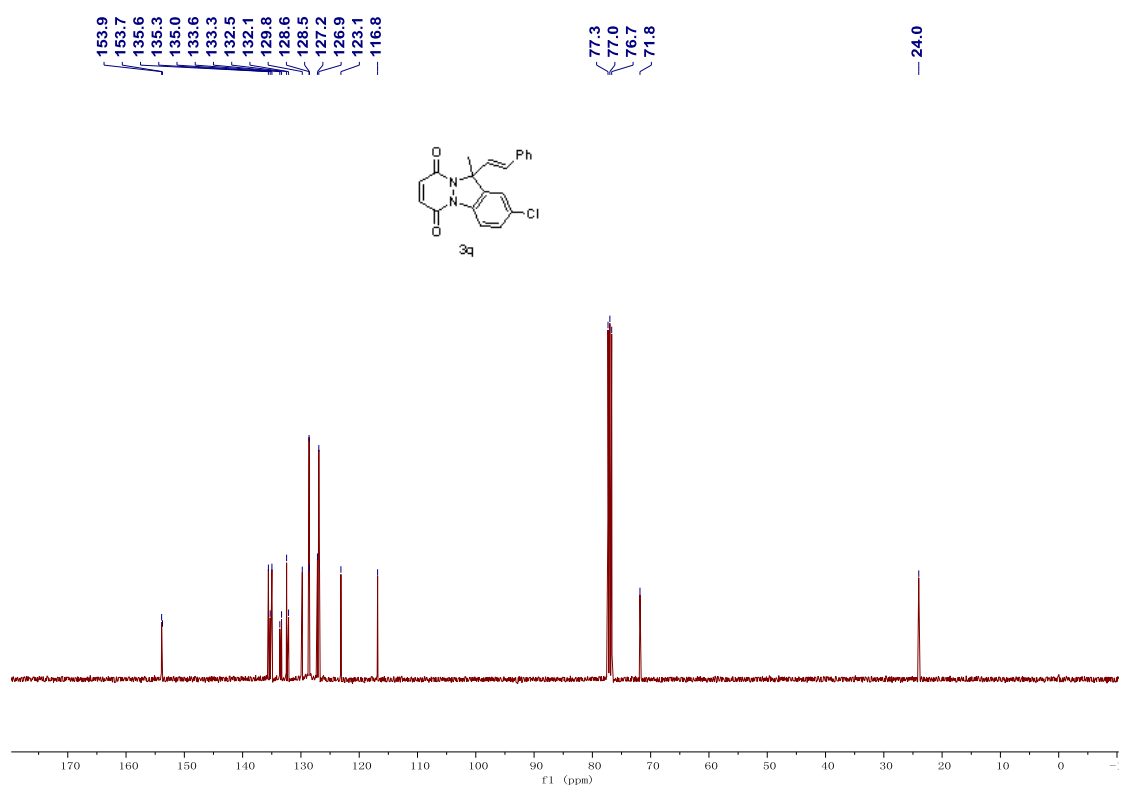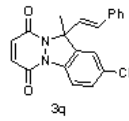

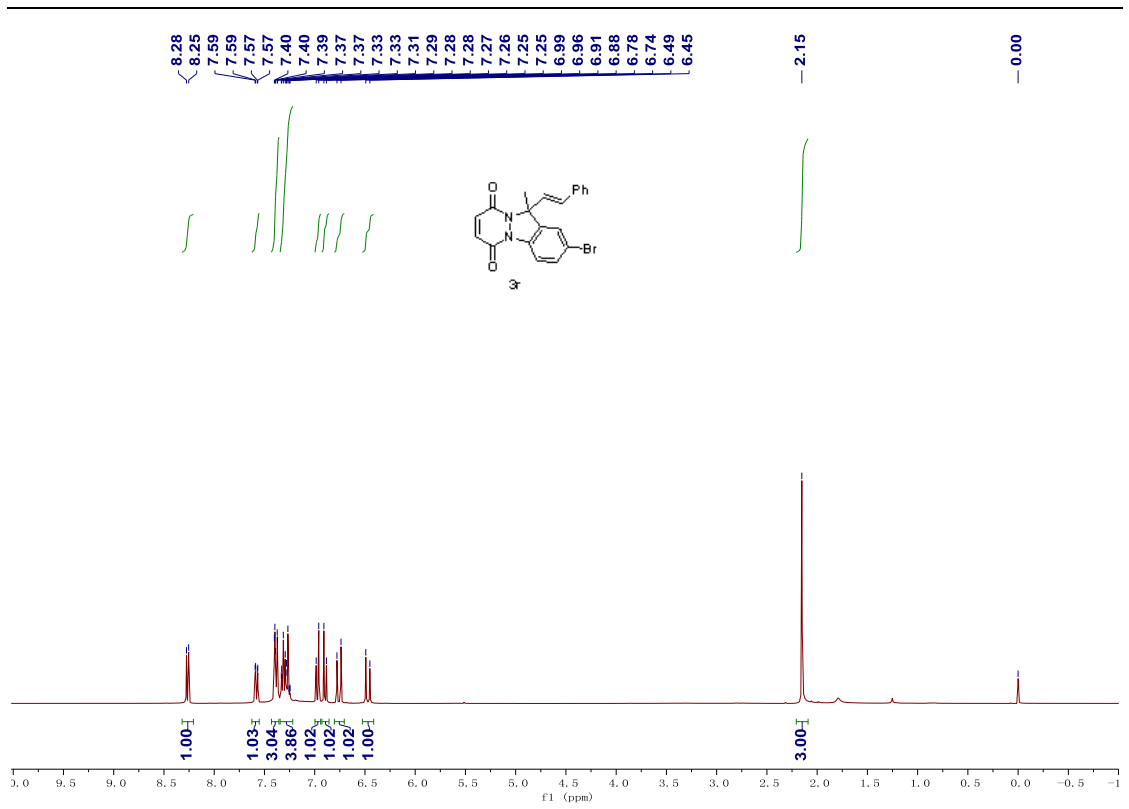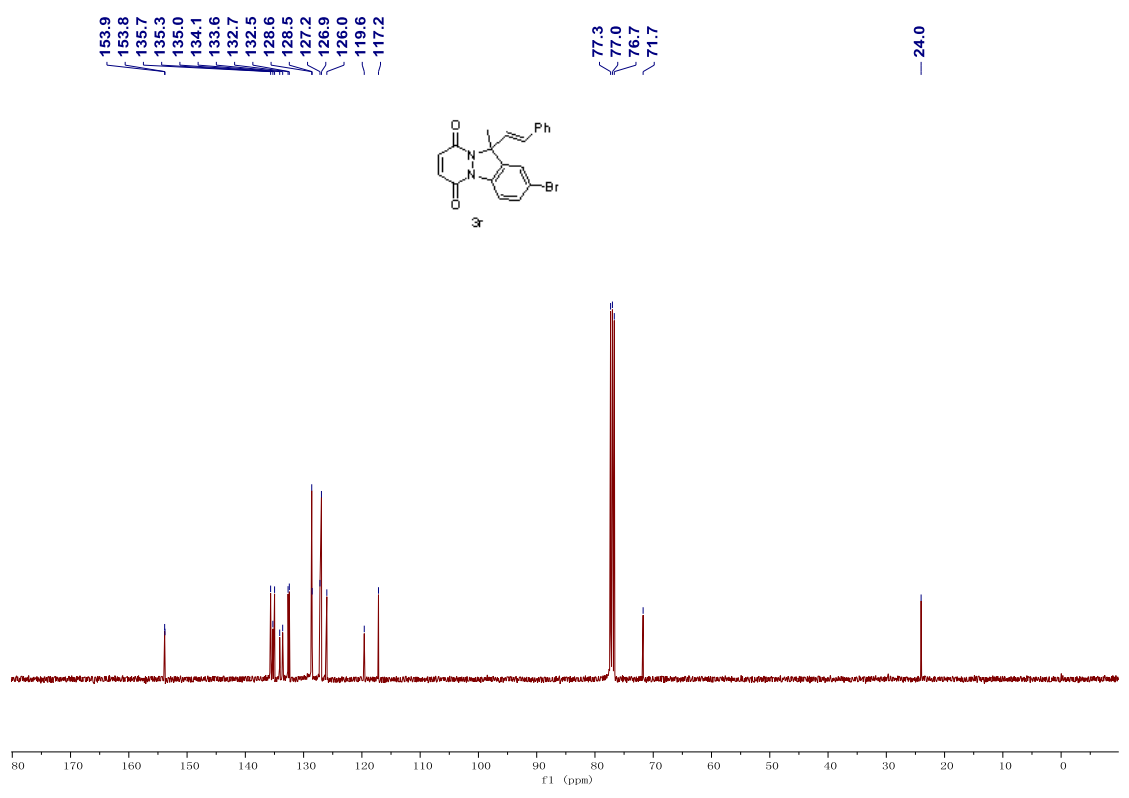

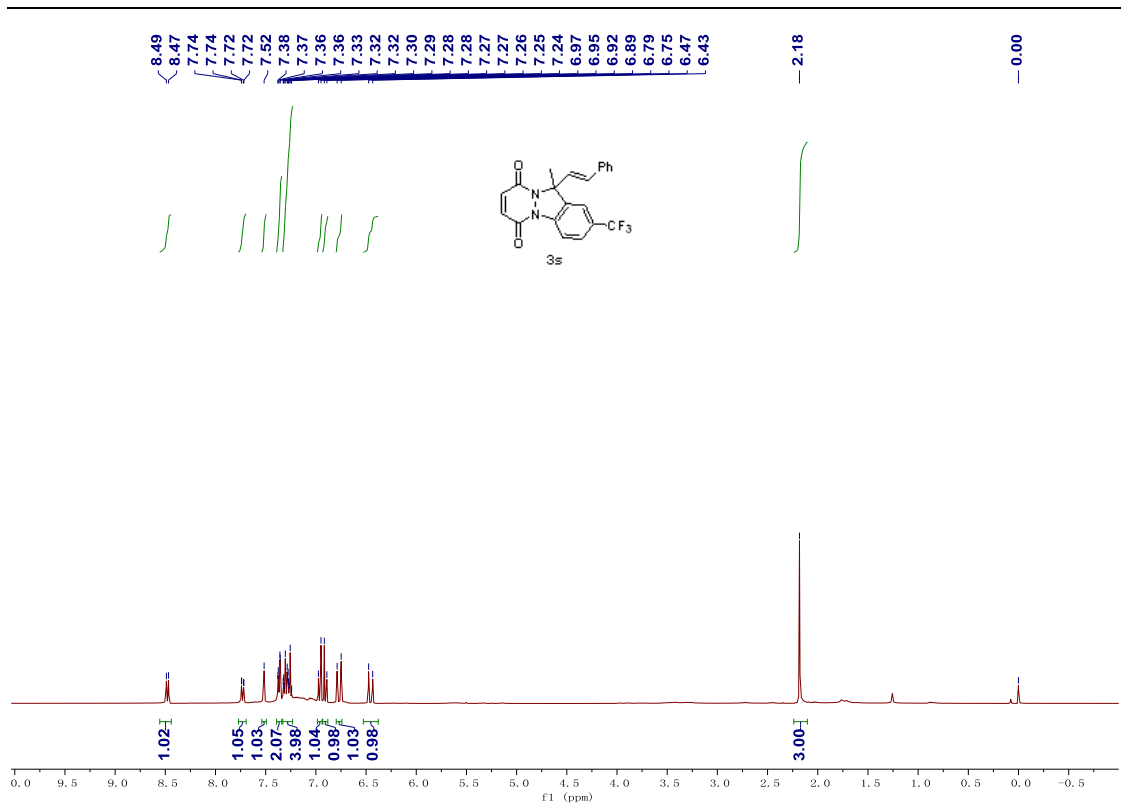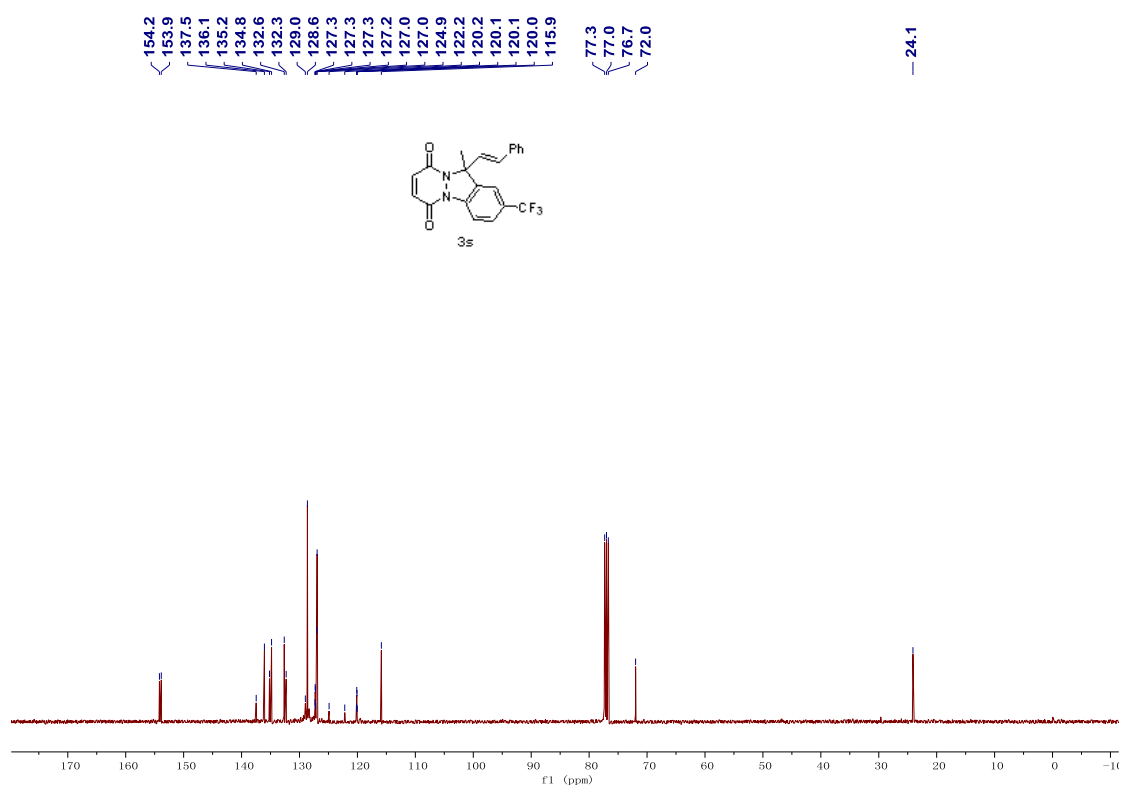

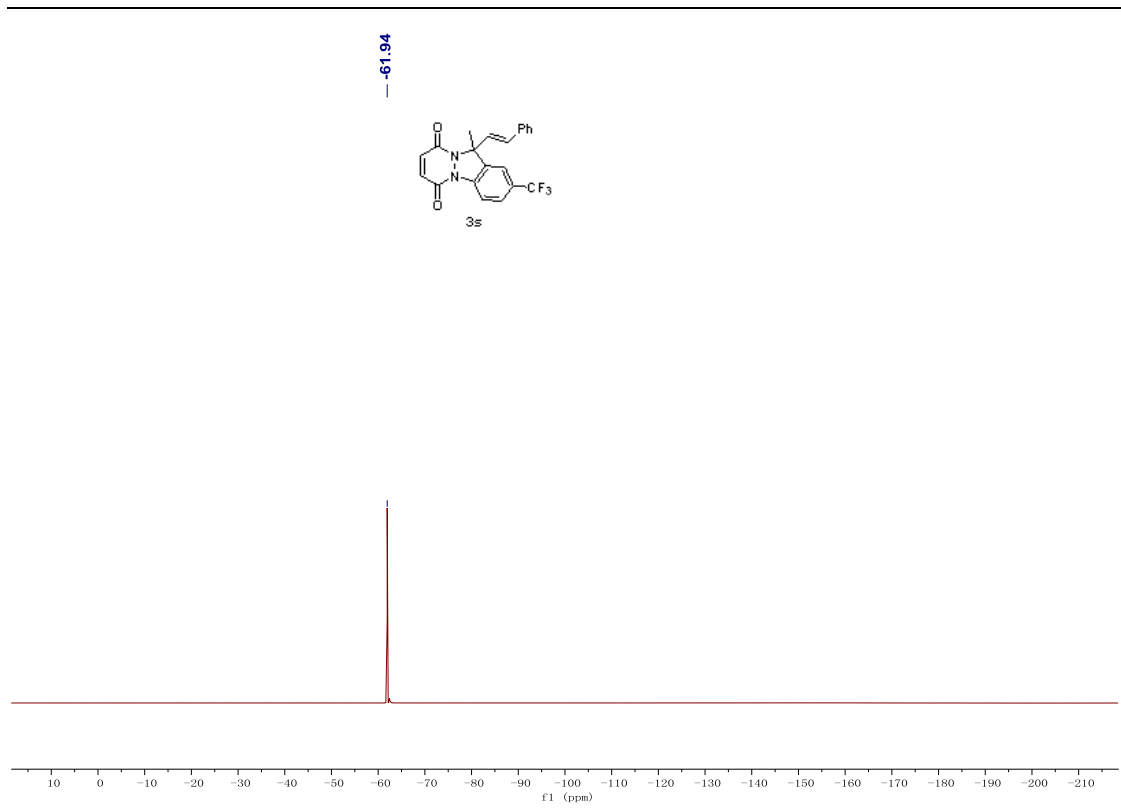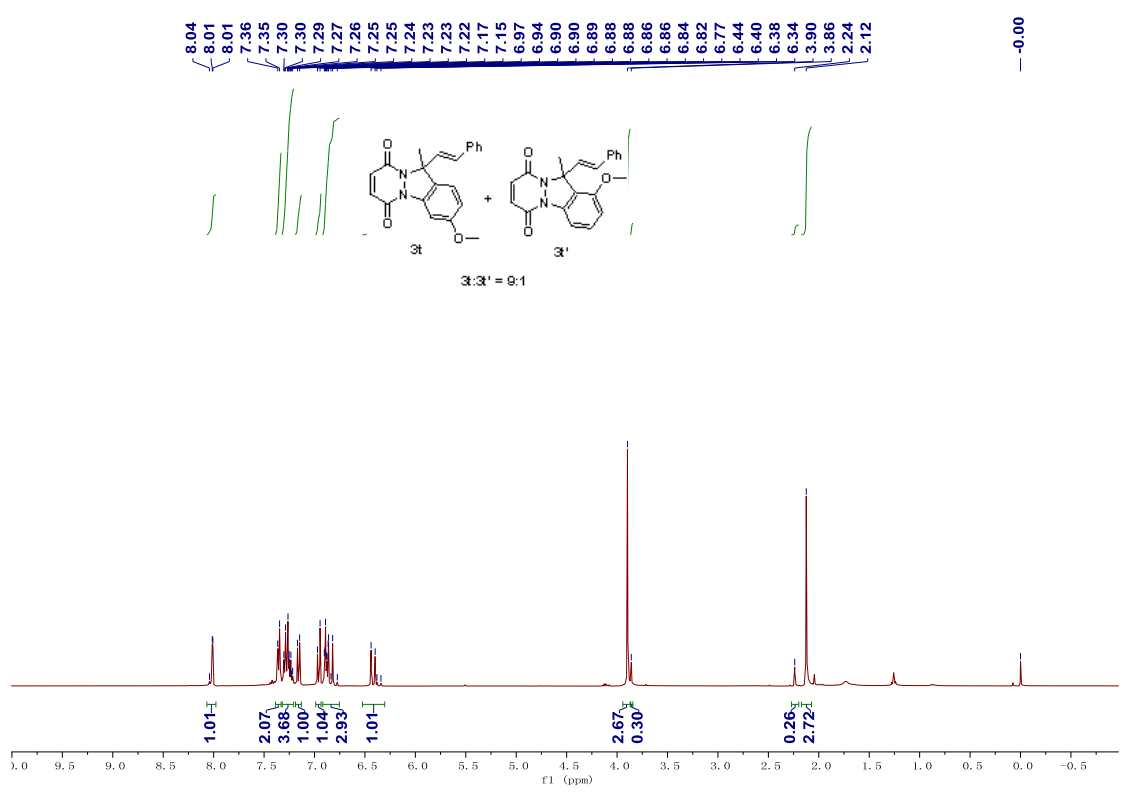

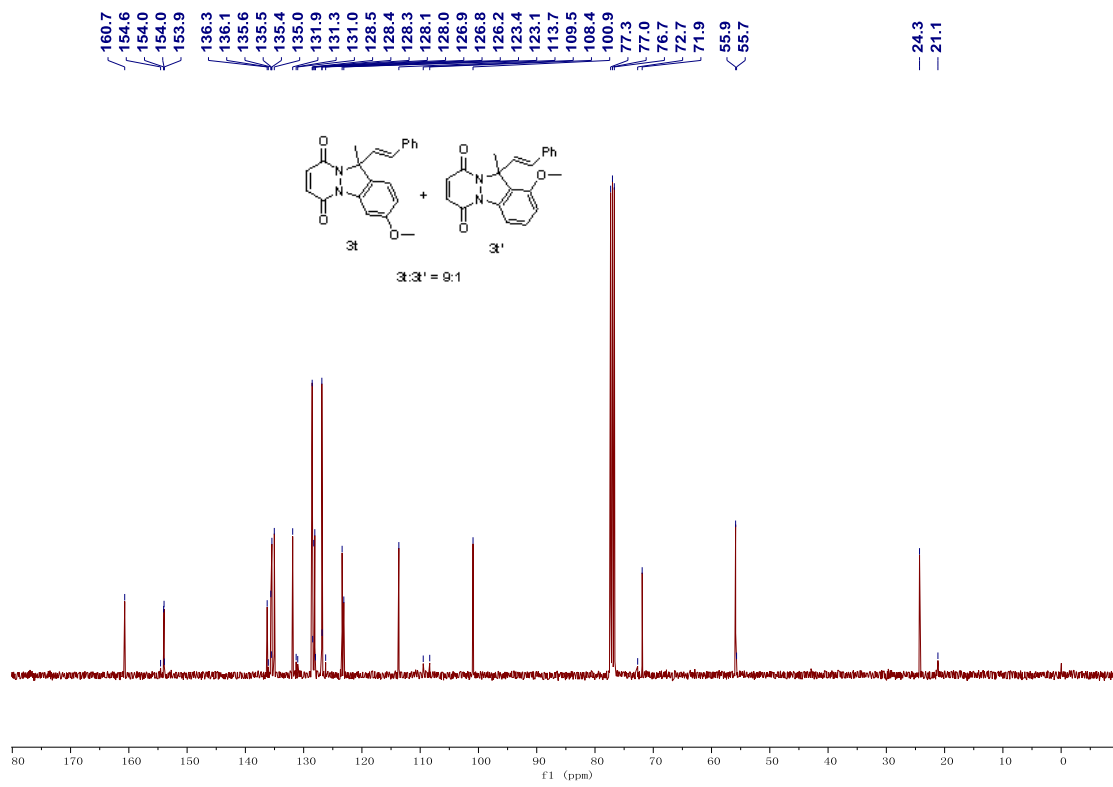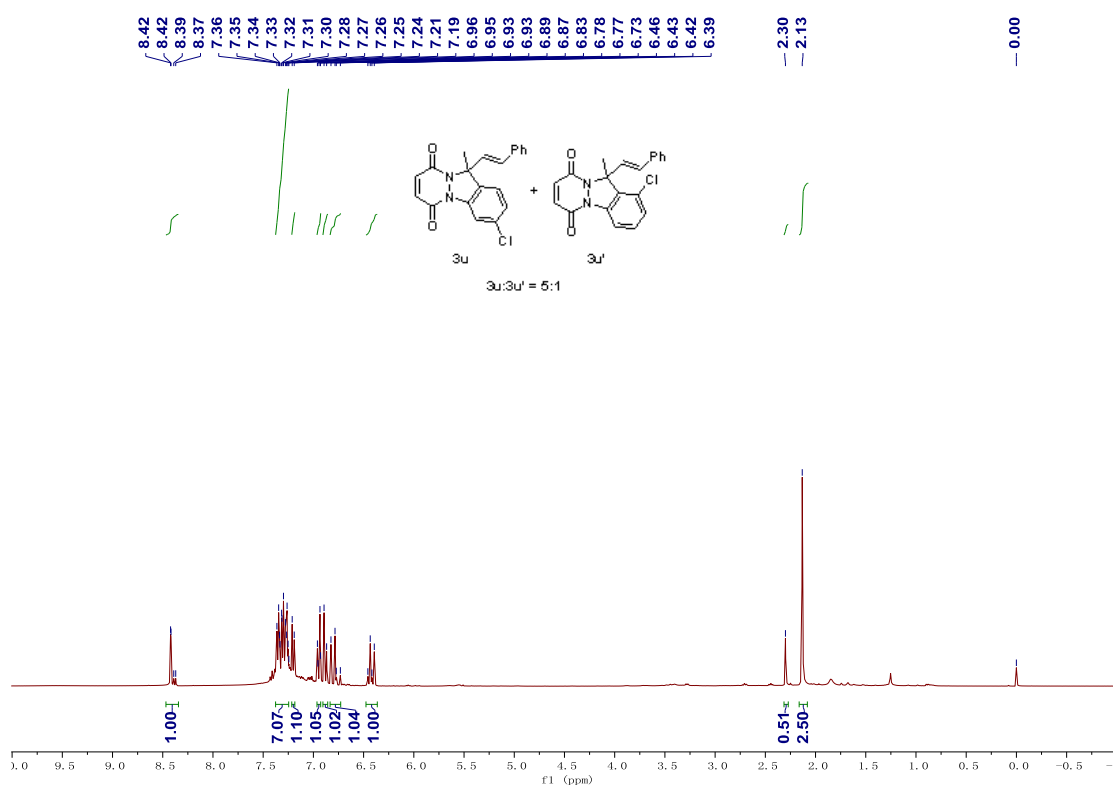

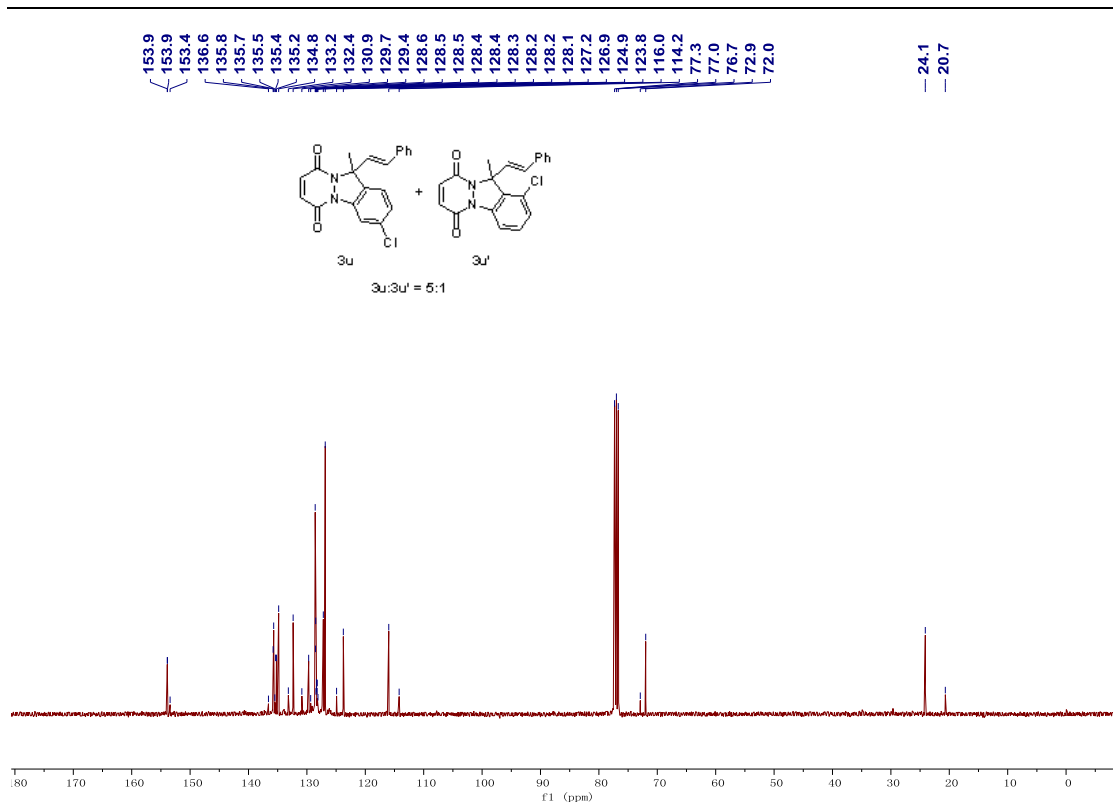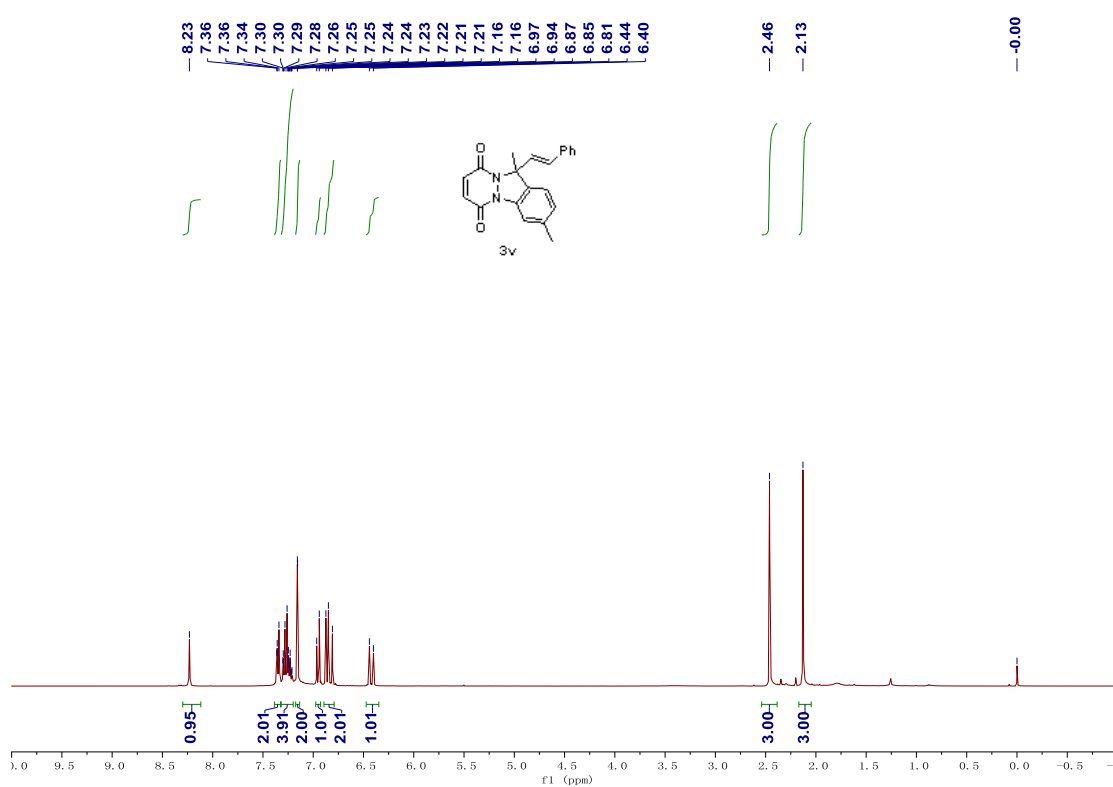

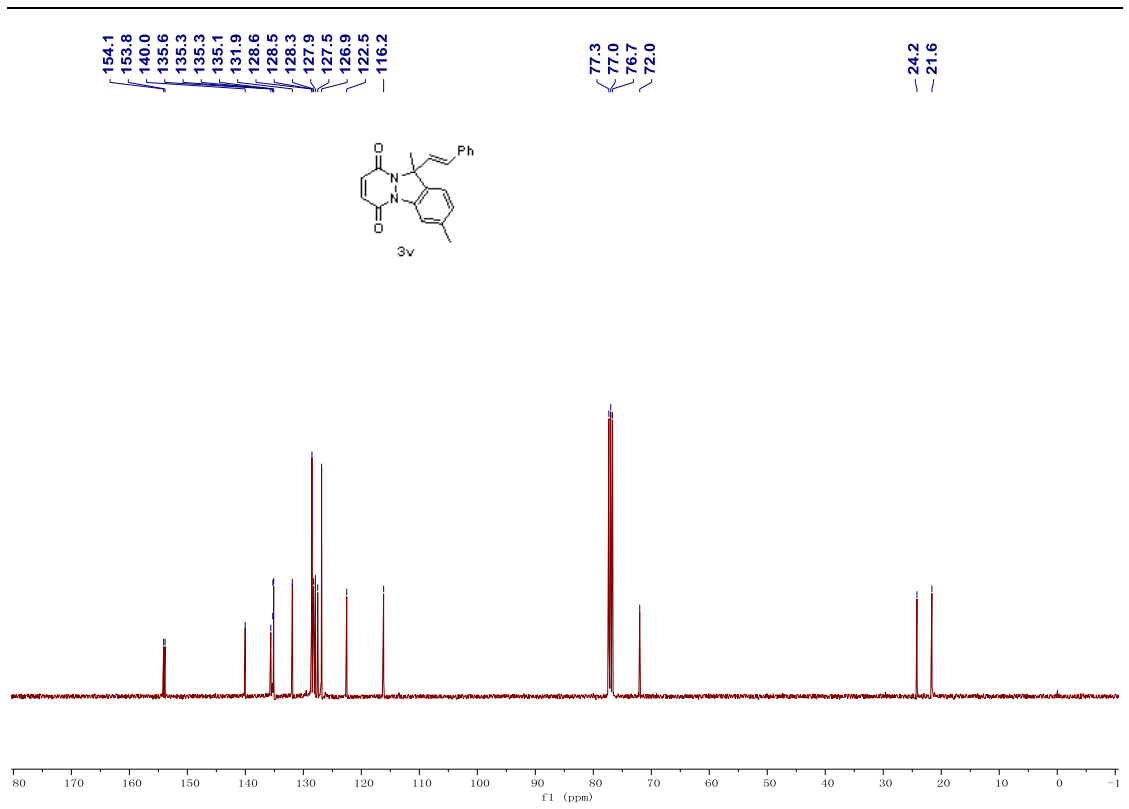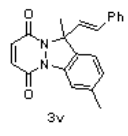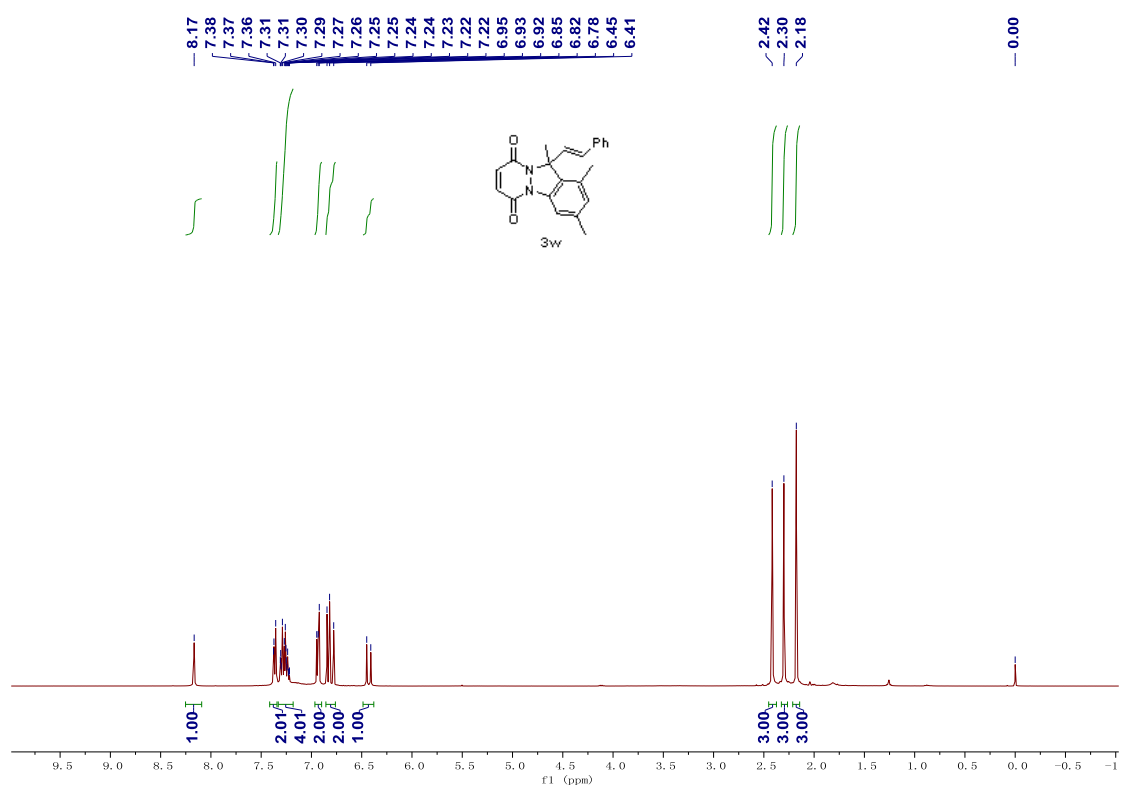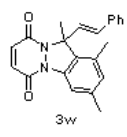



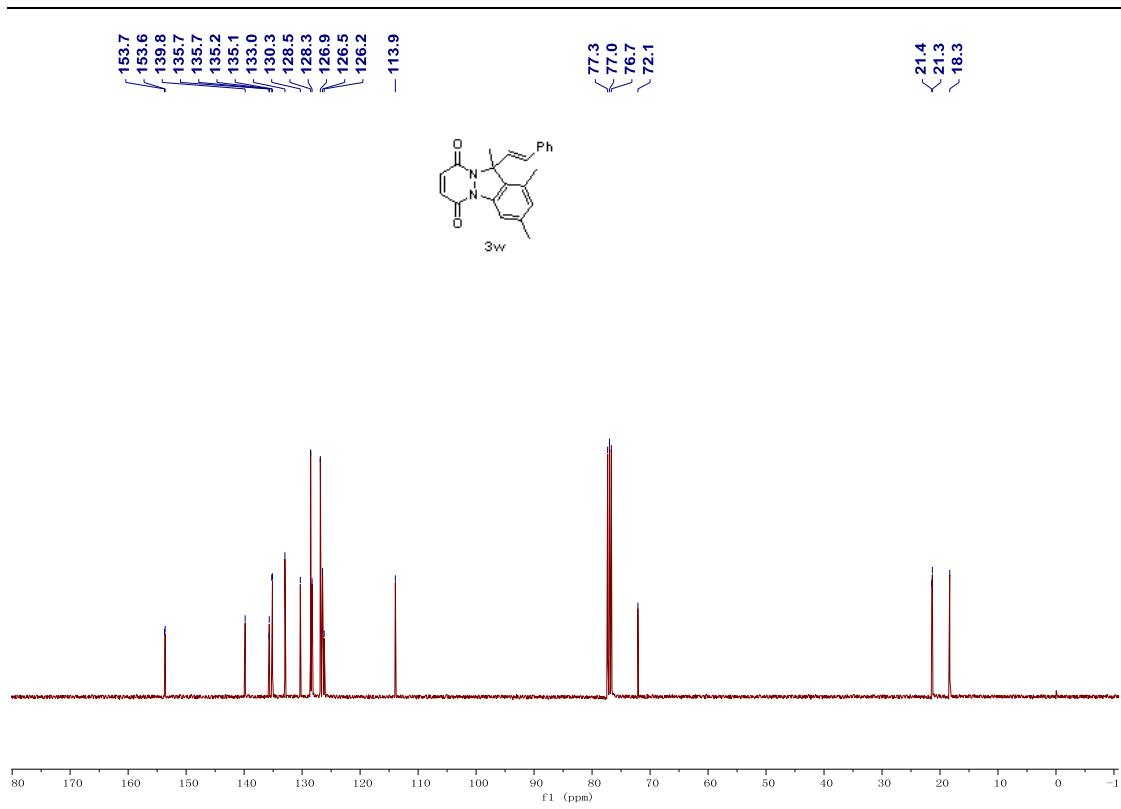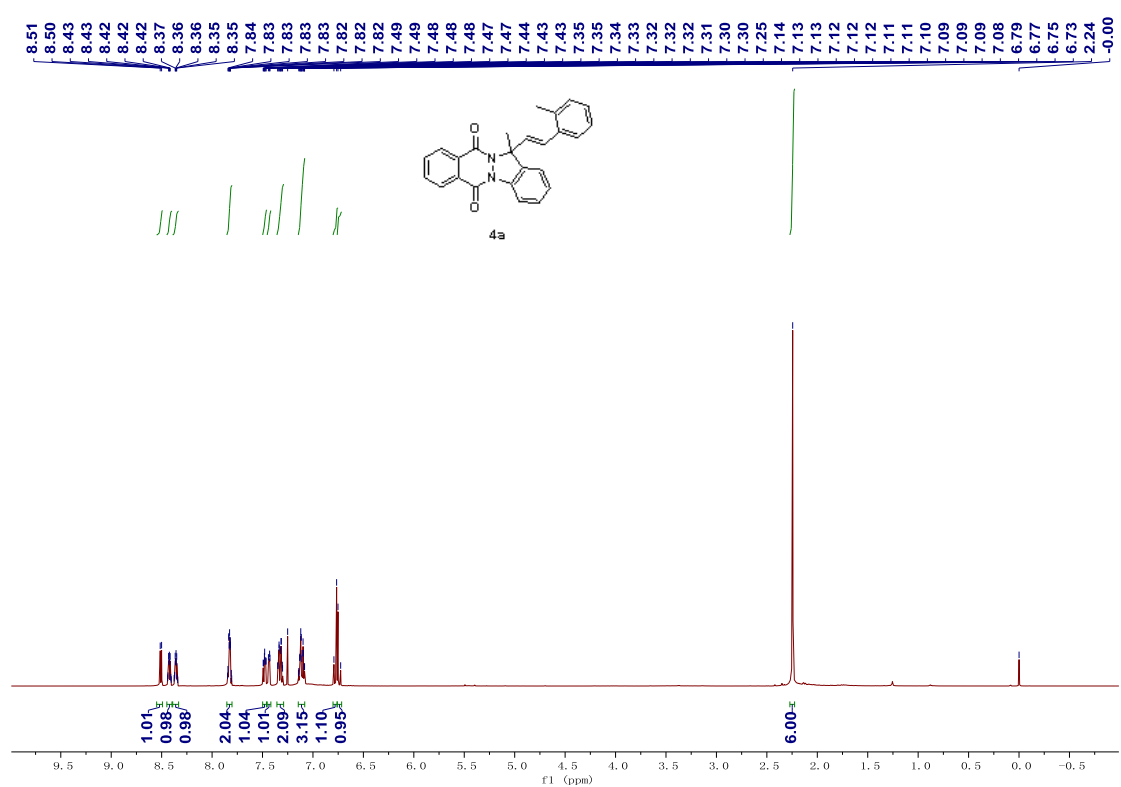

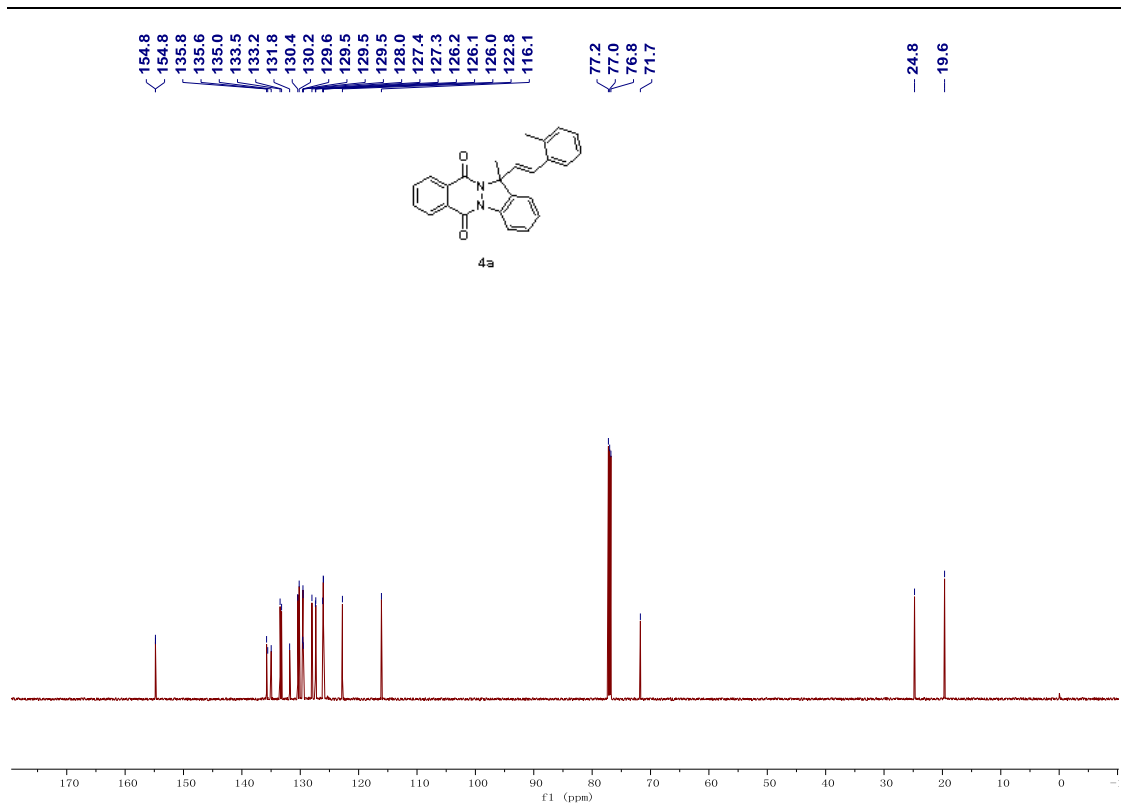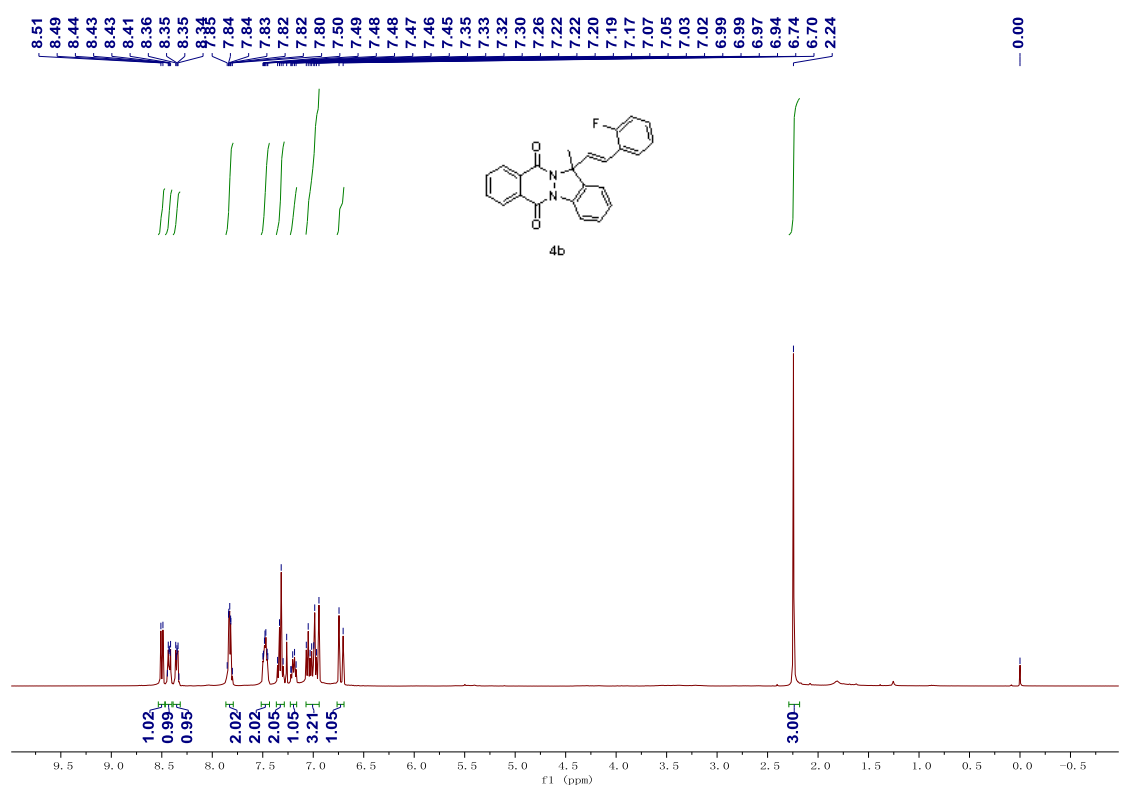

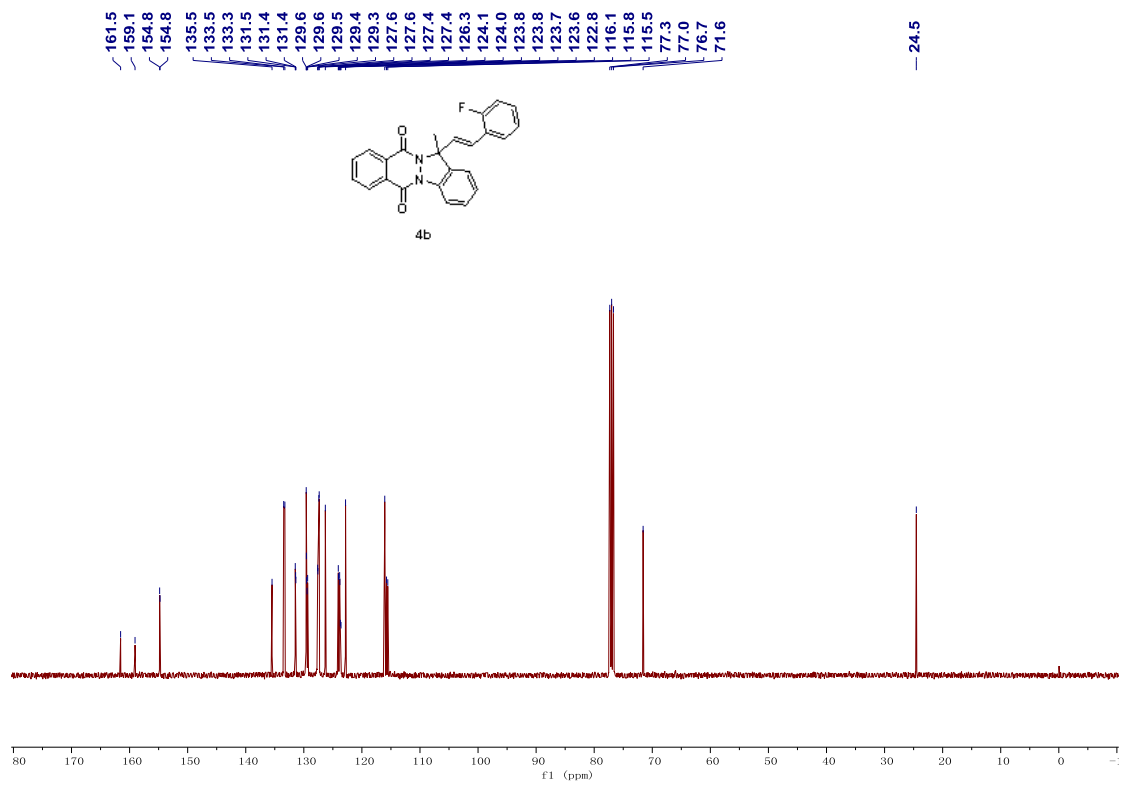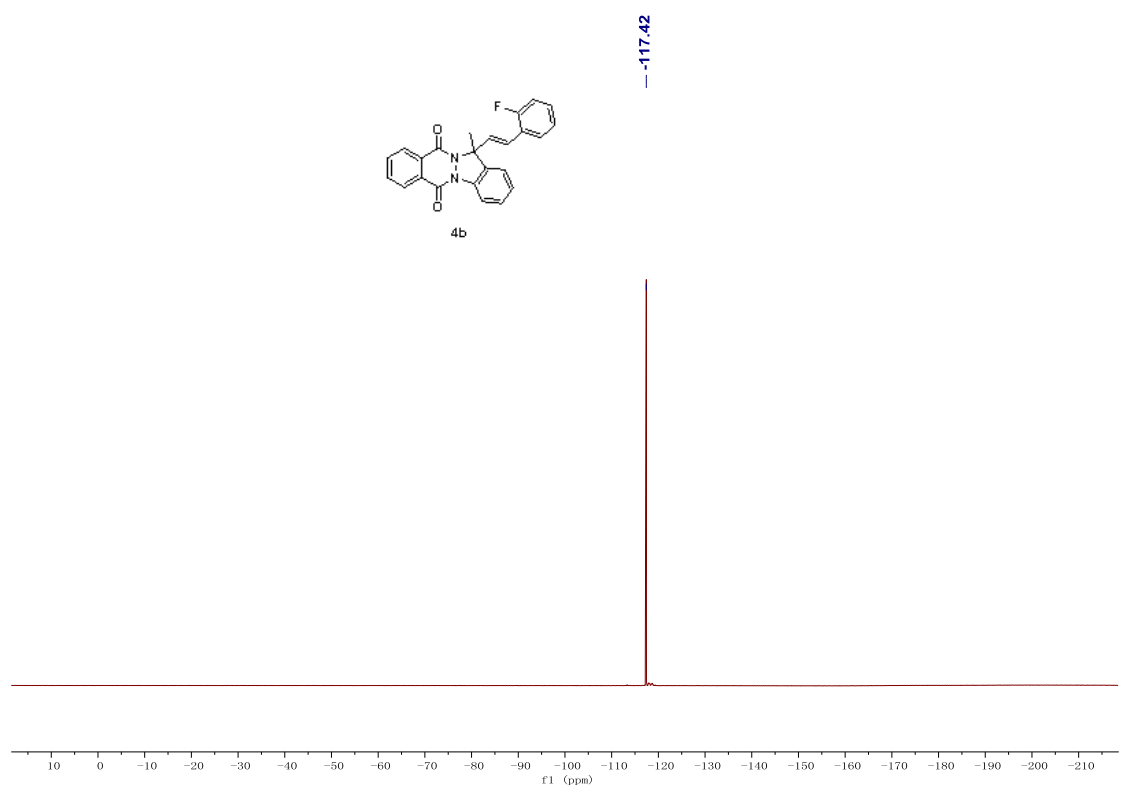

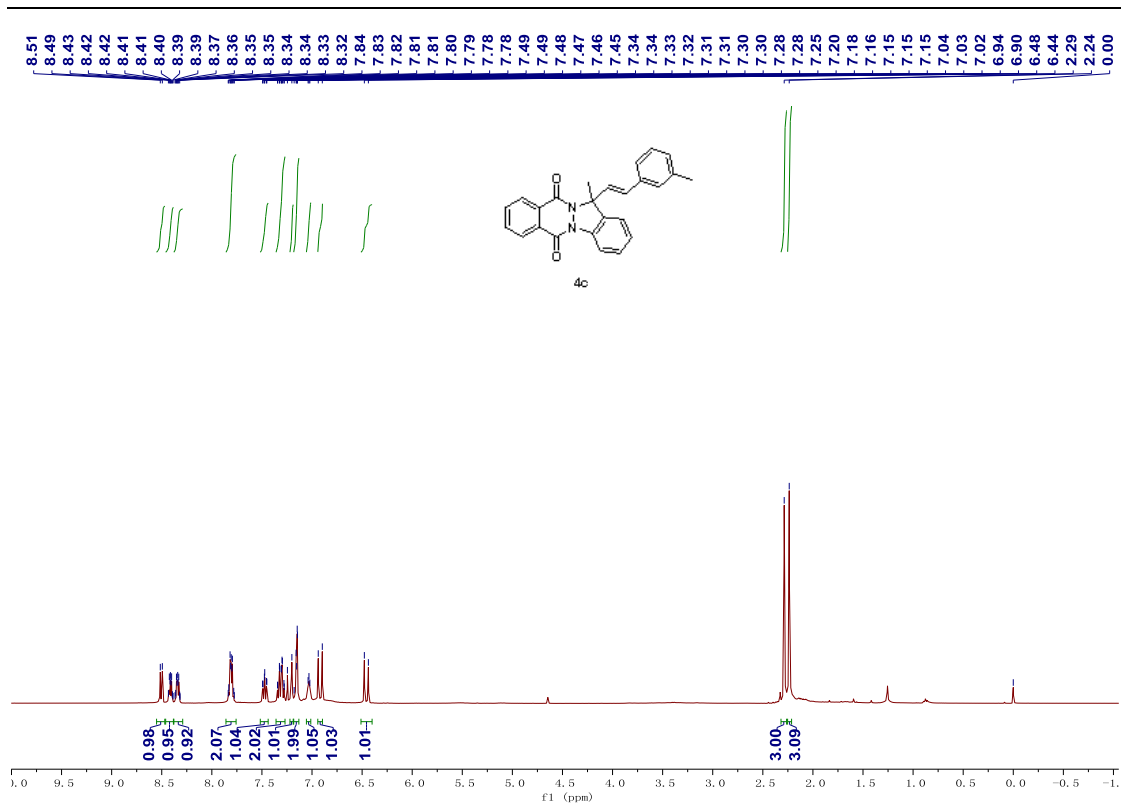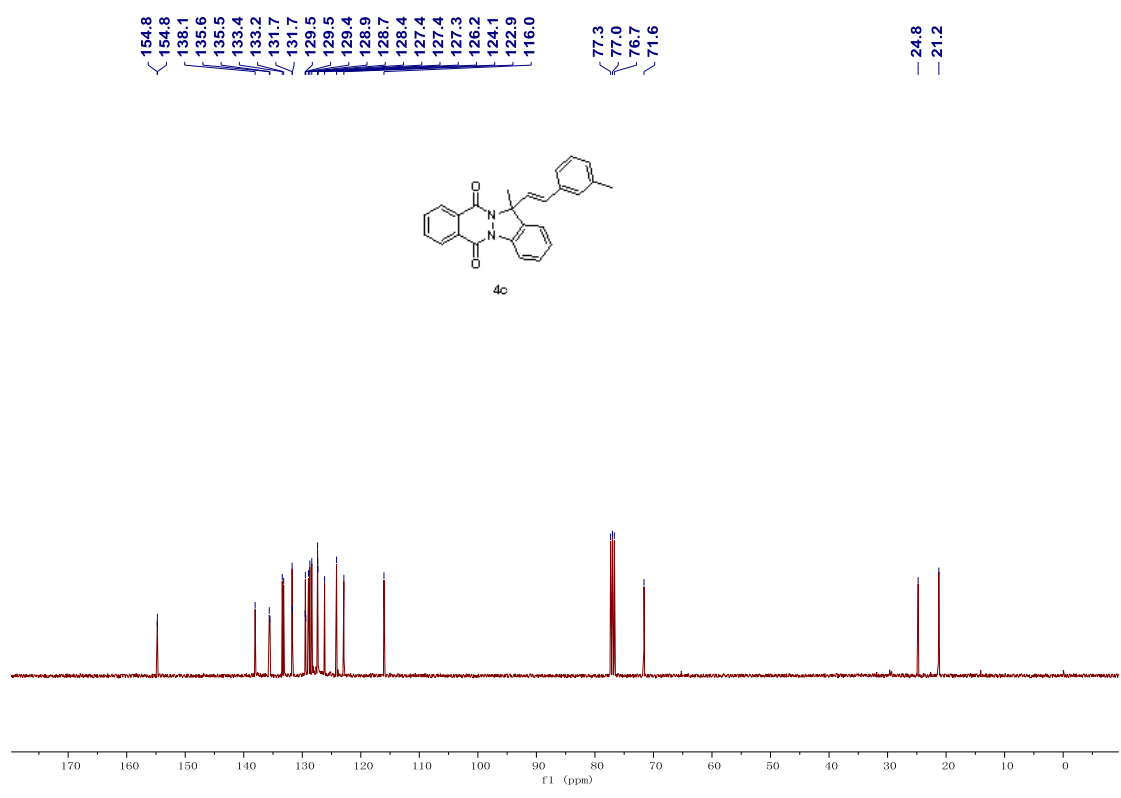

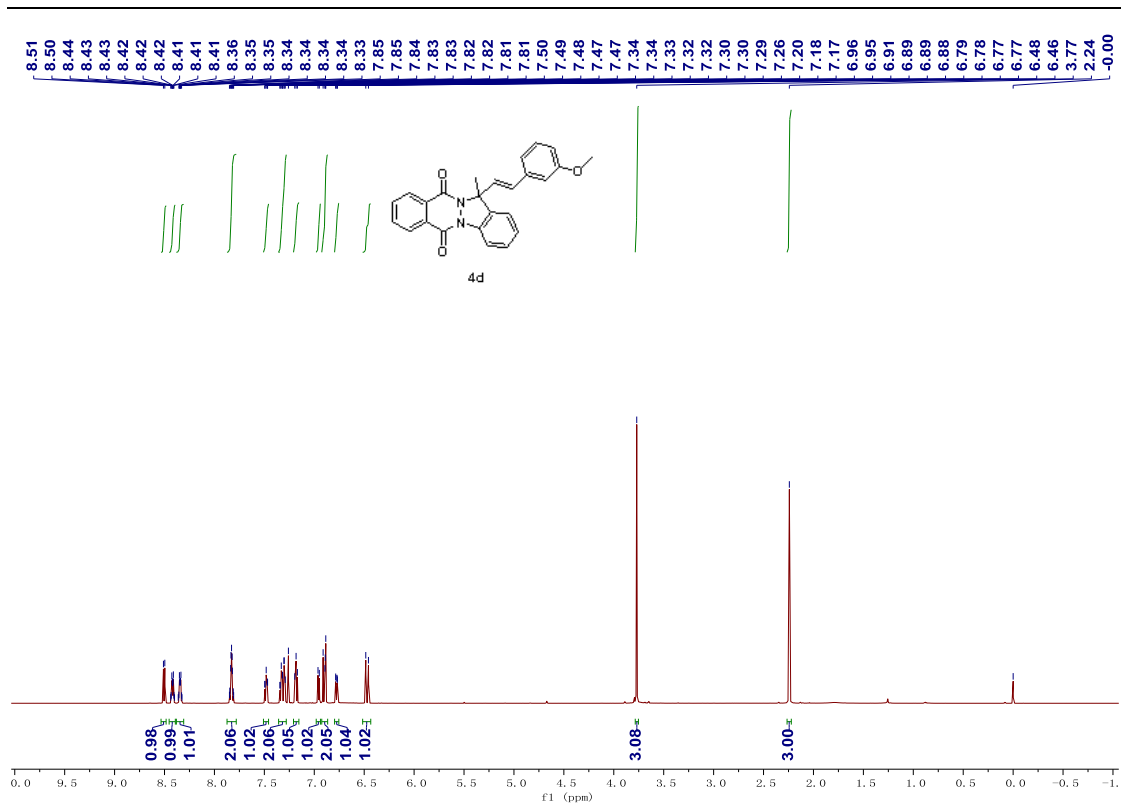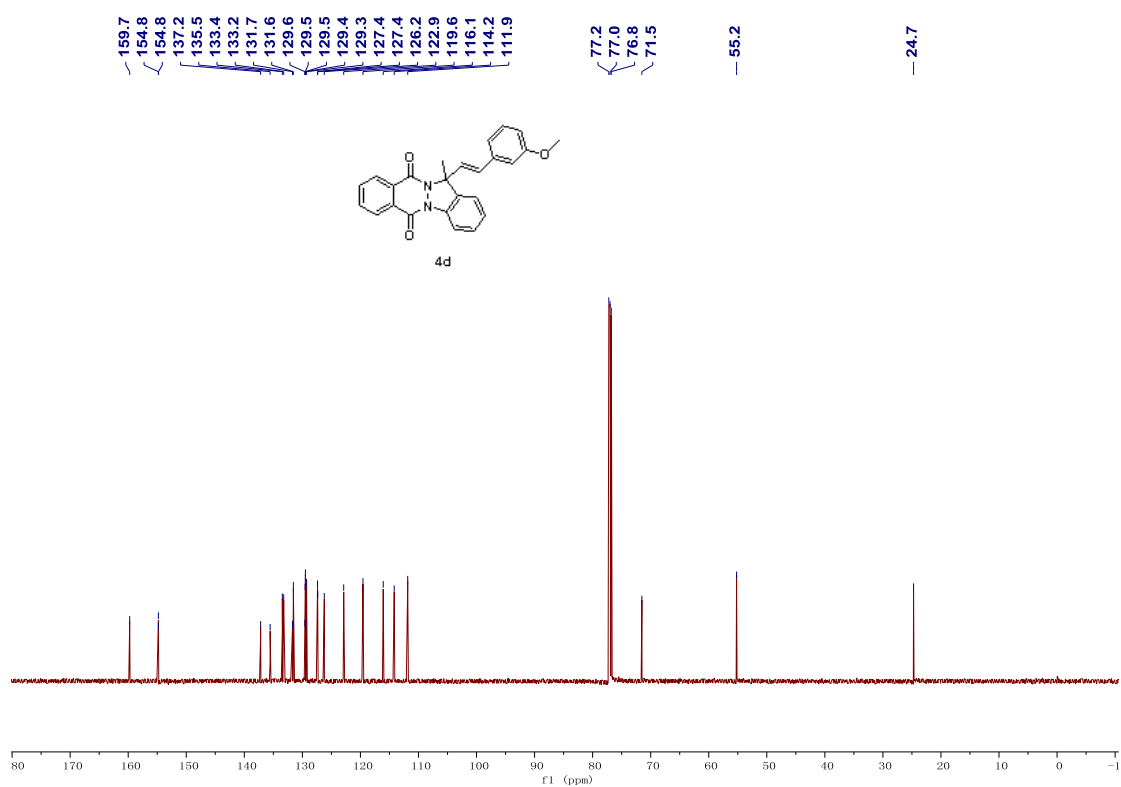

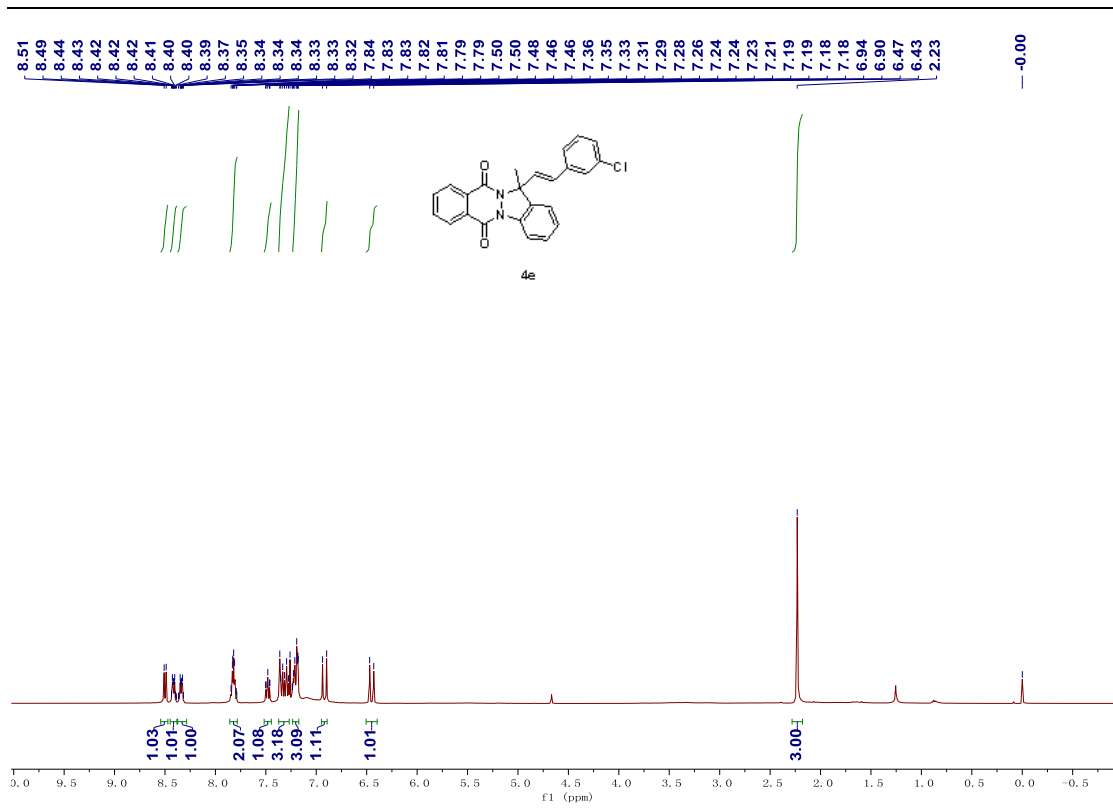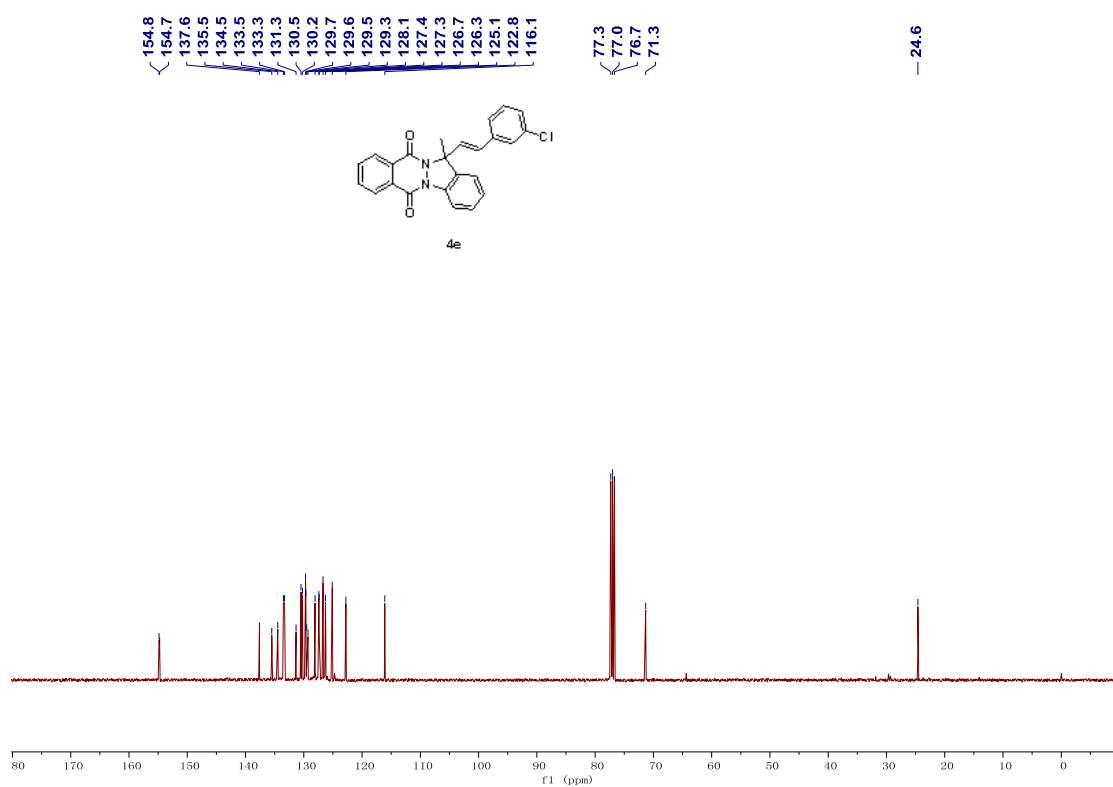

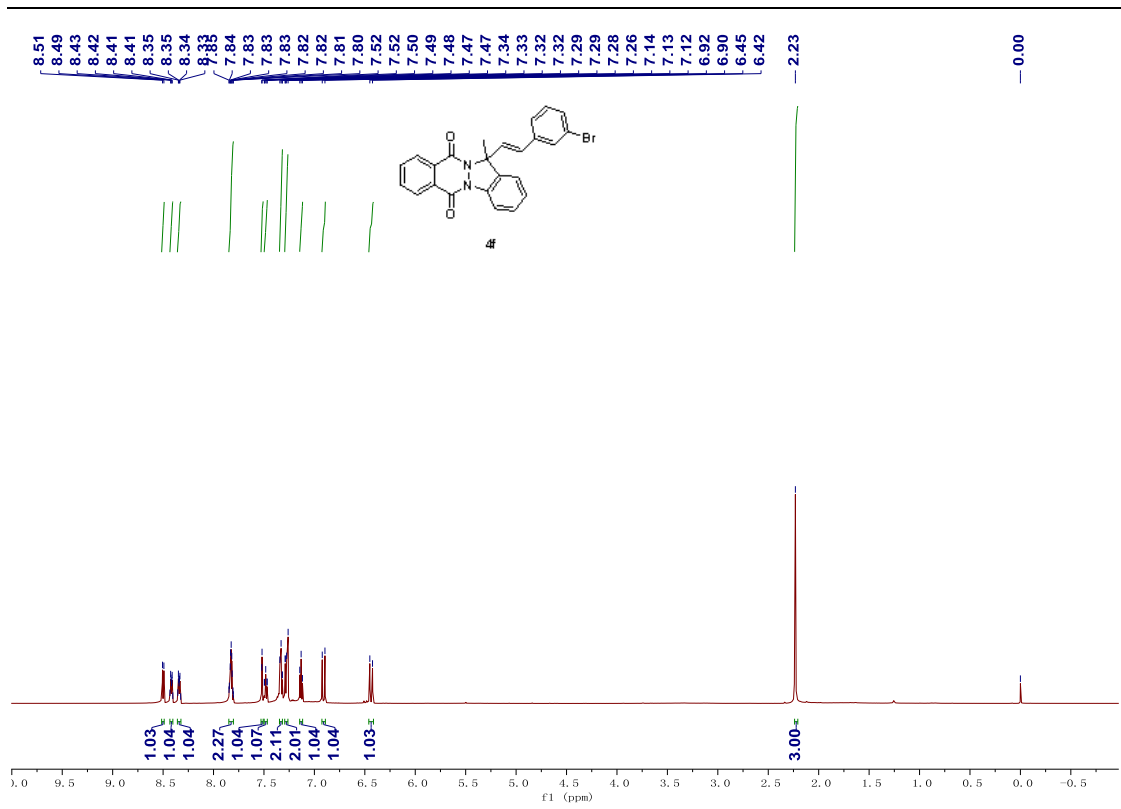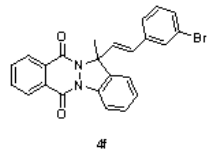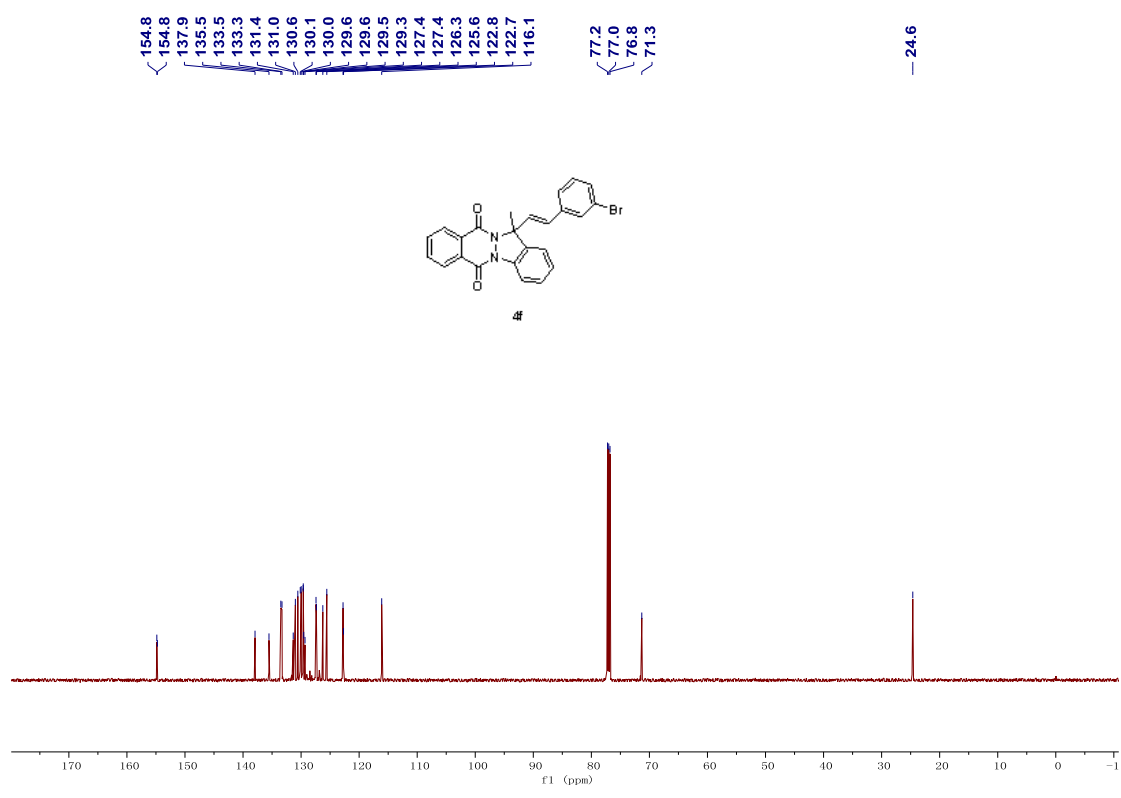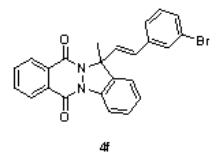

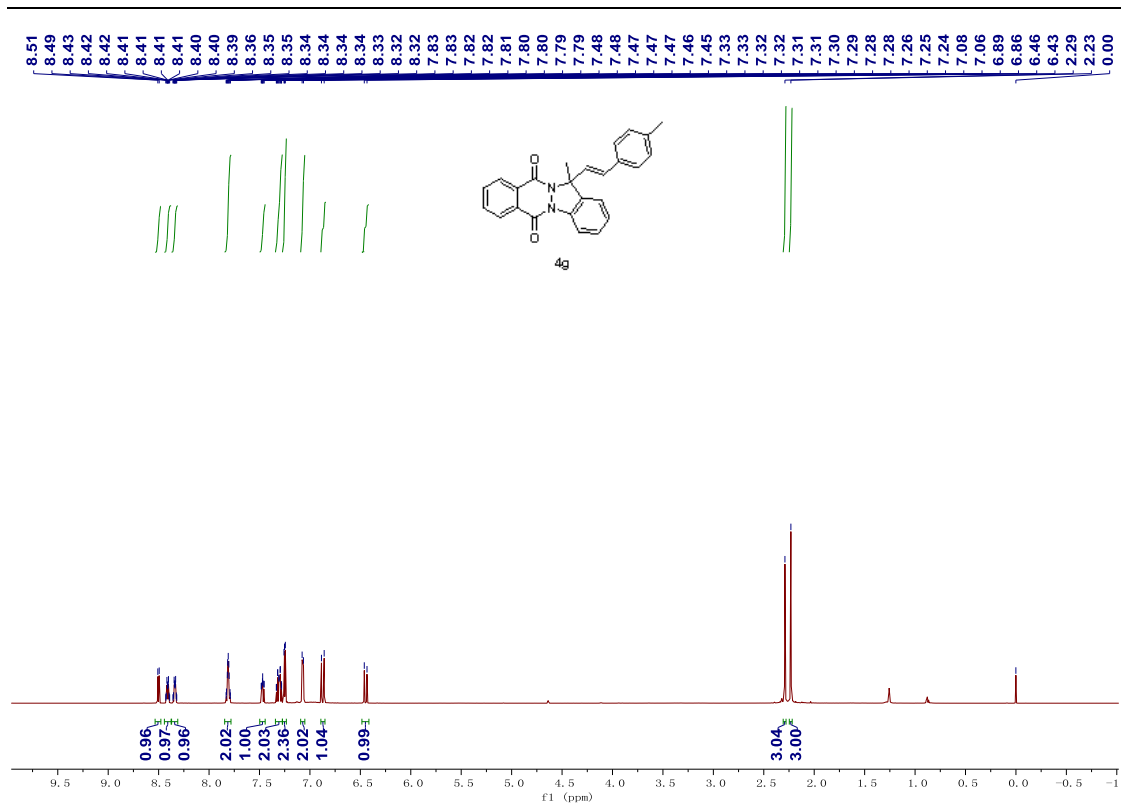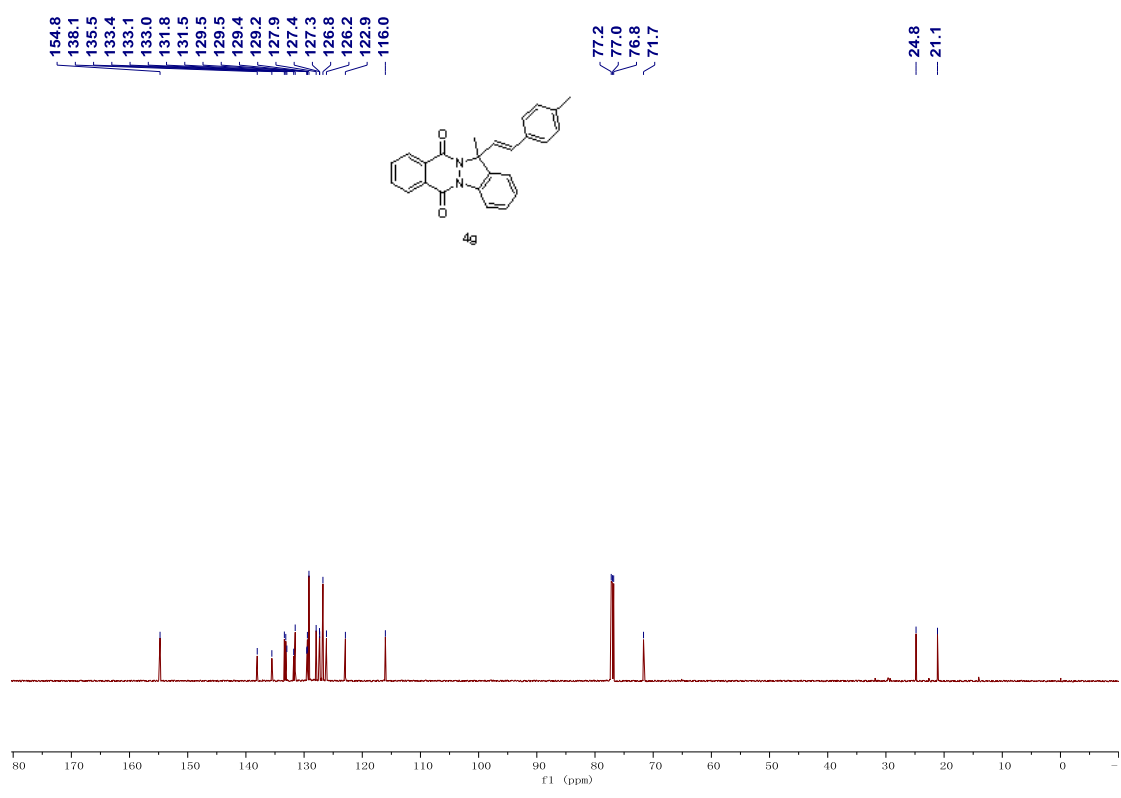



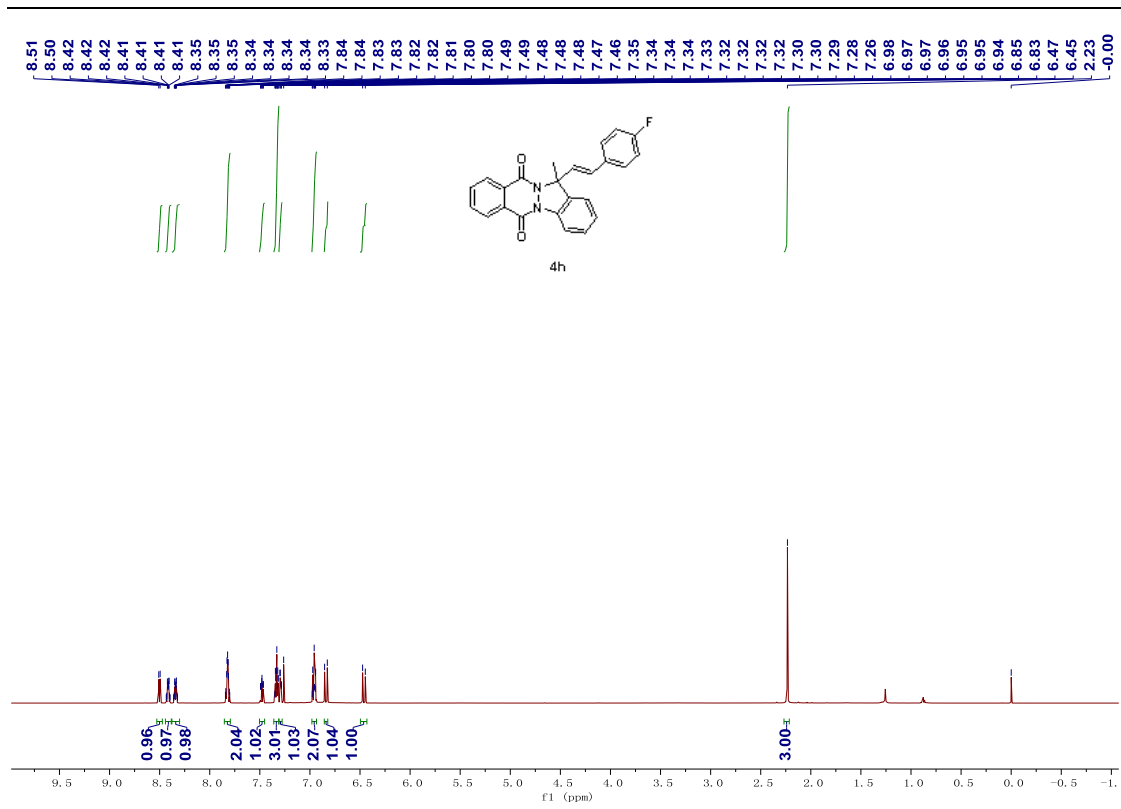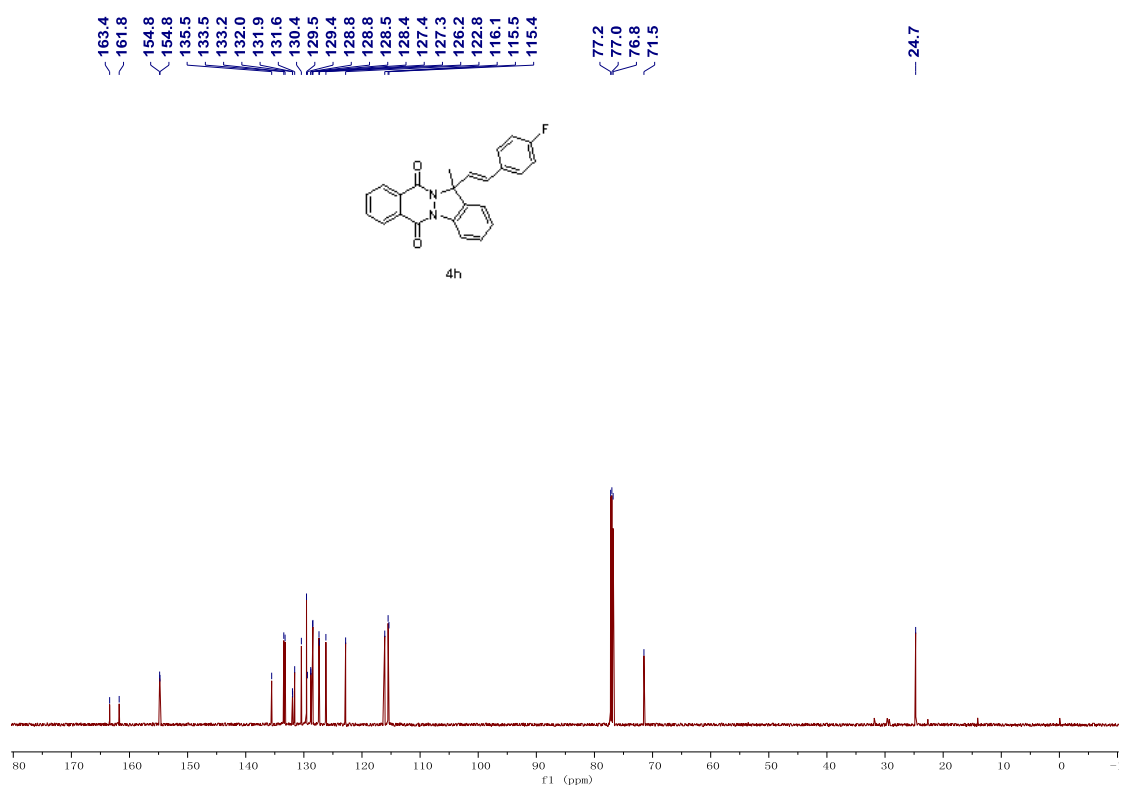

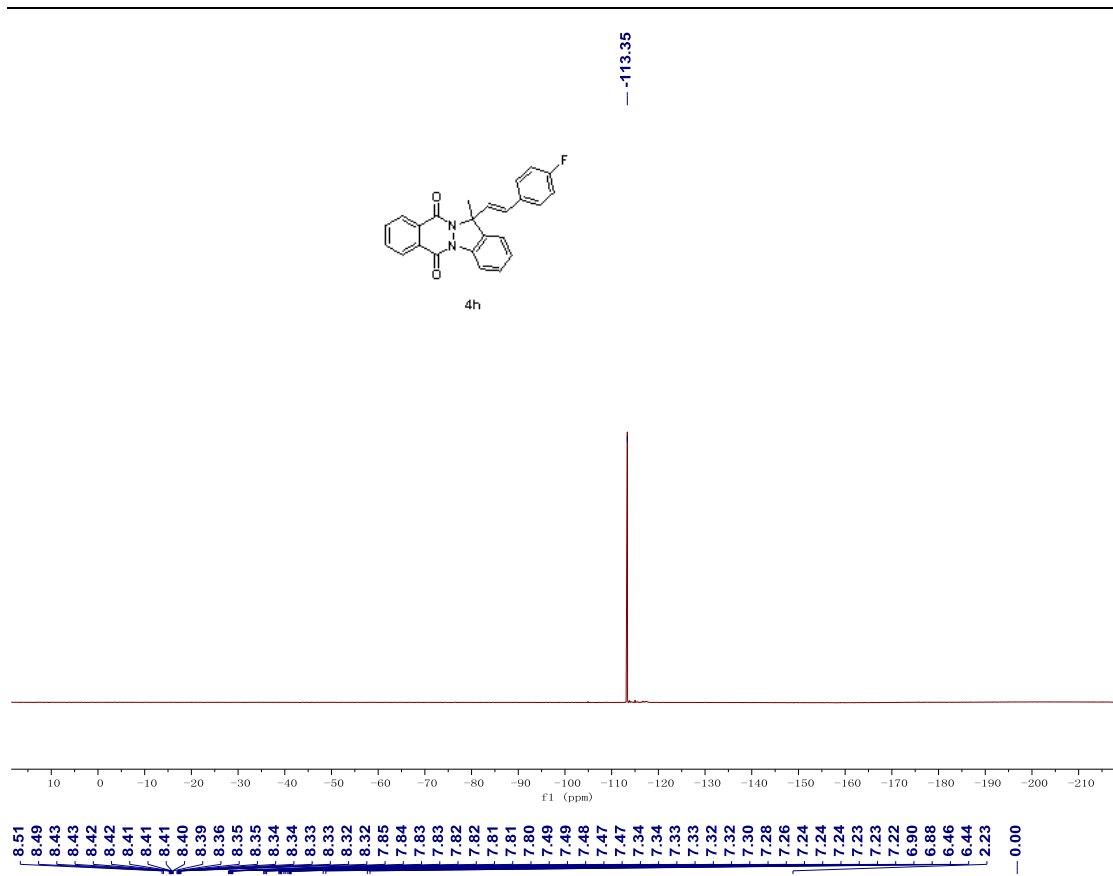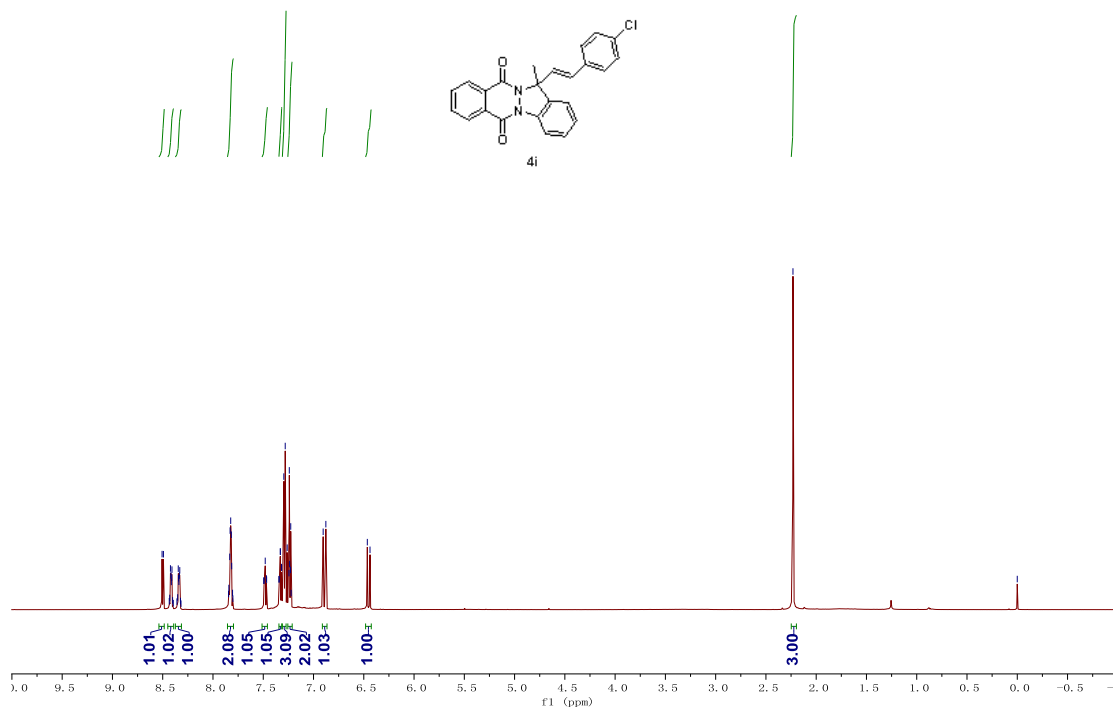

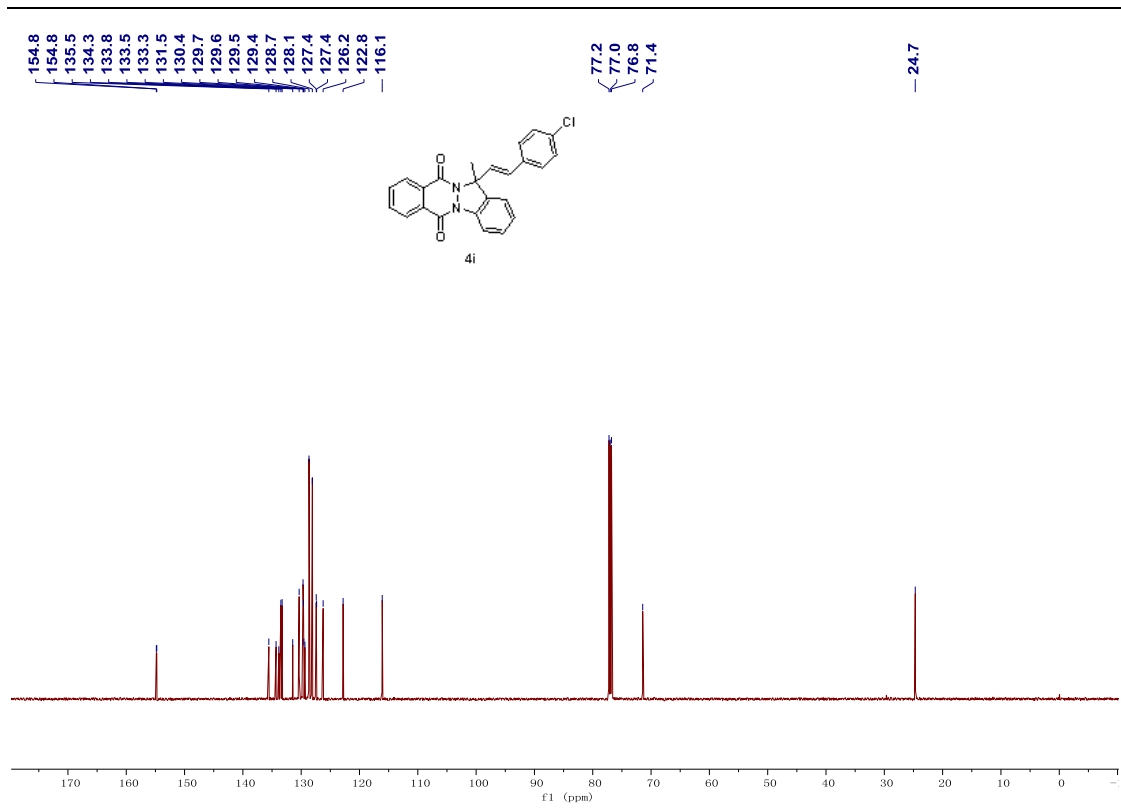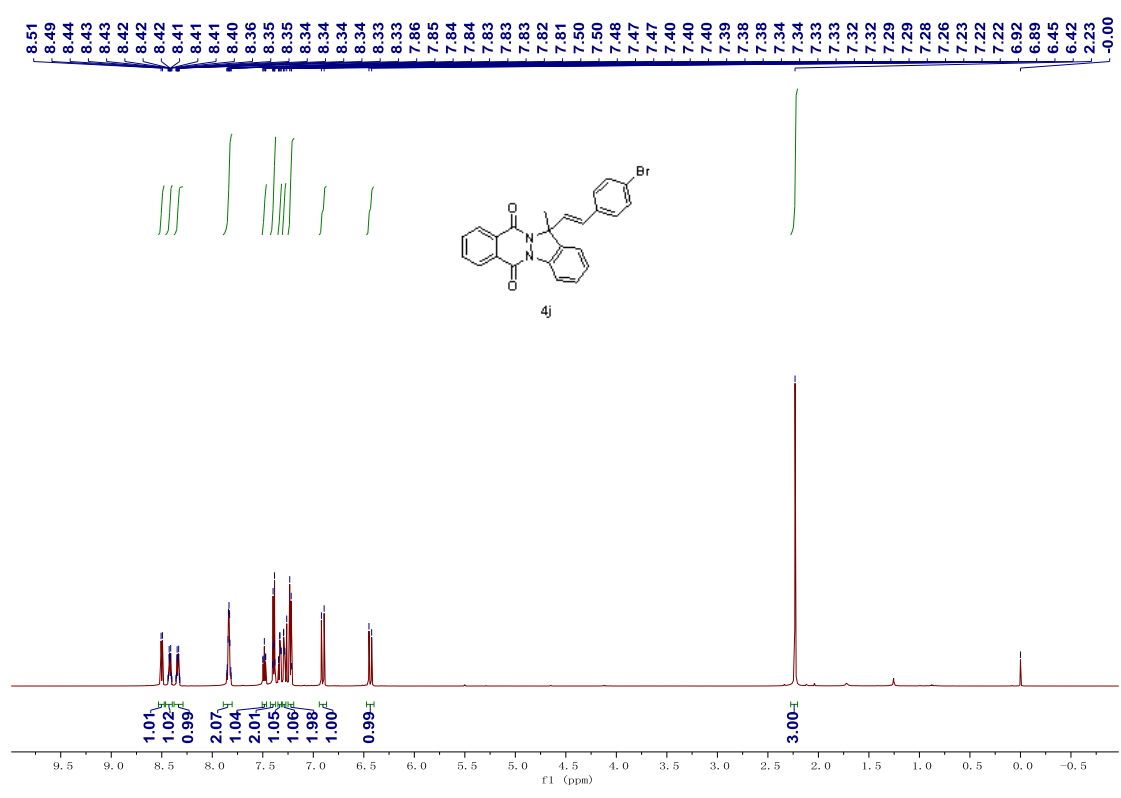

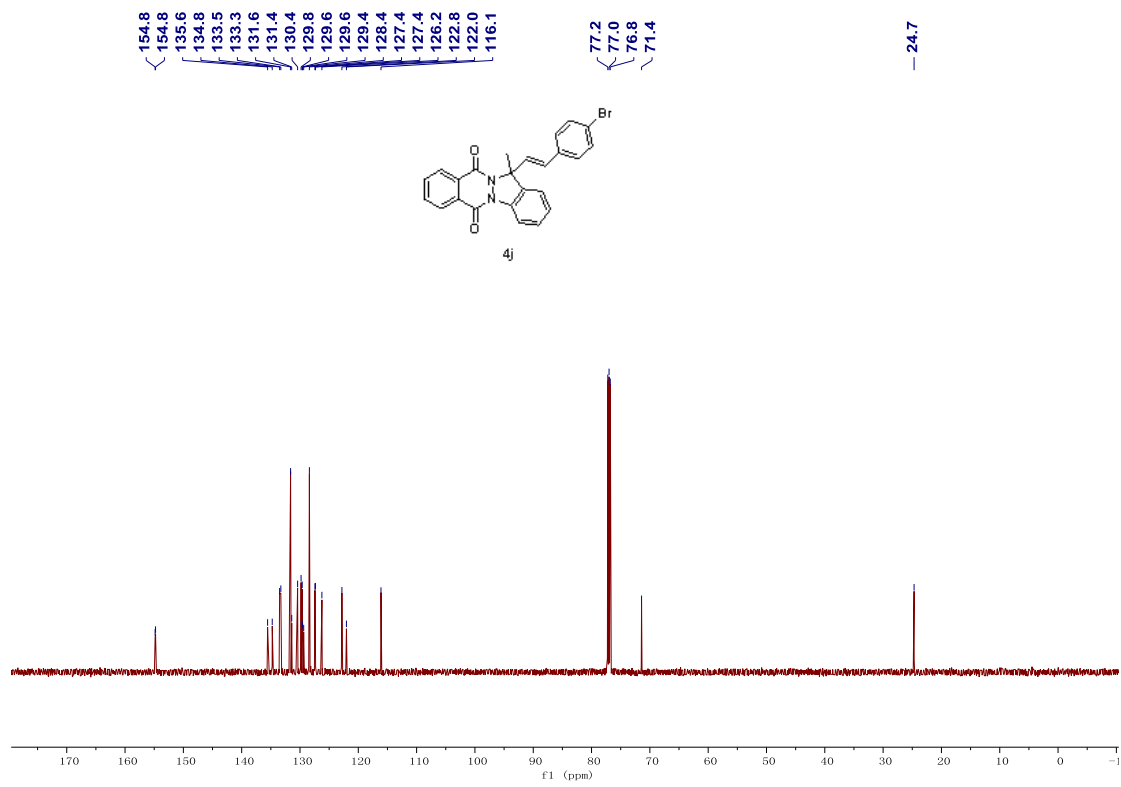

— 24.7

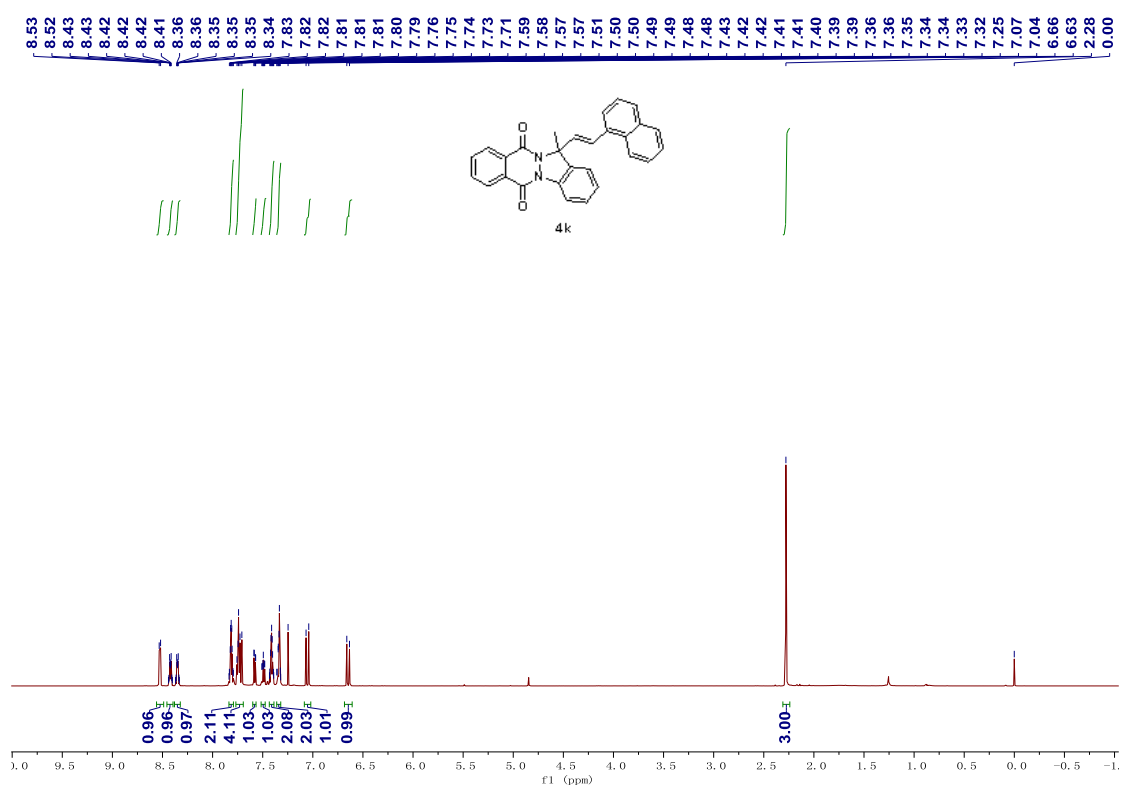

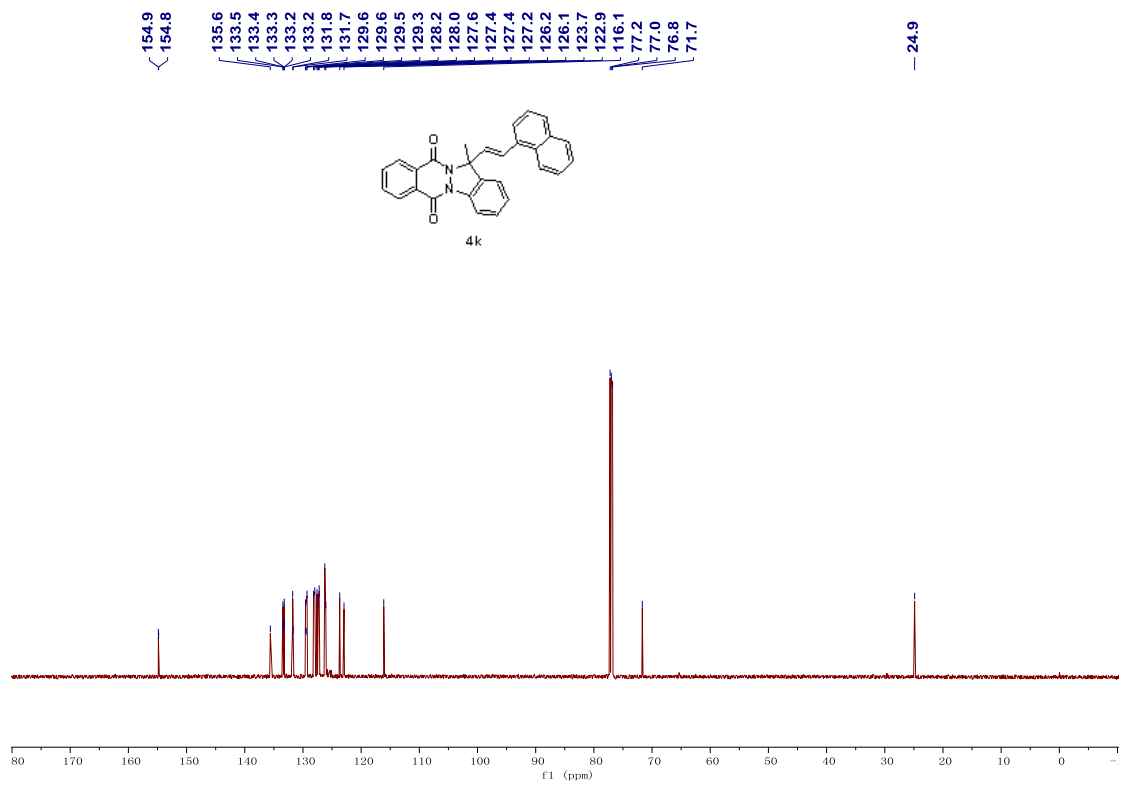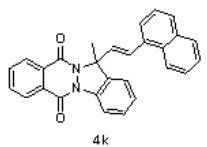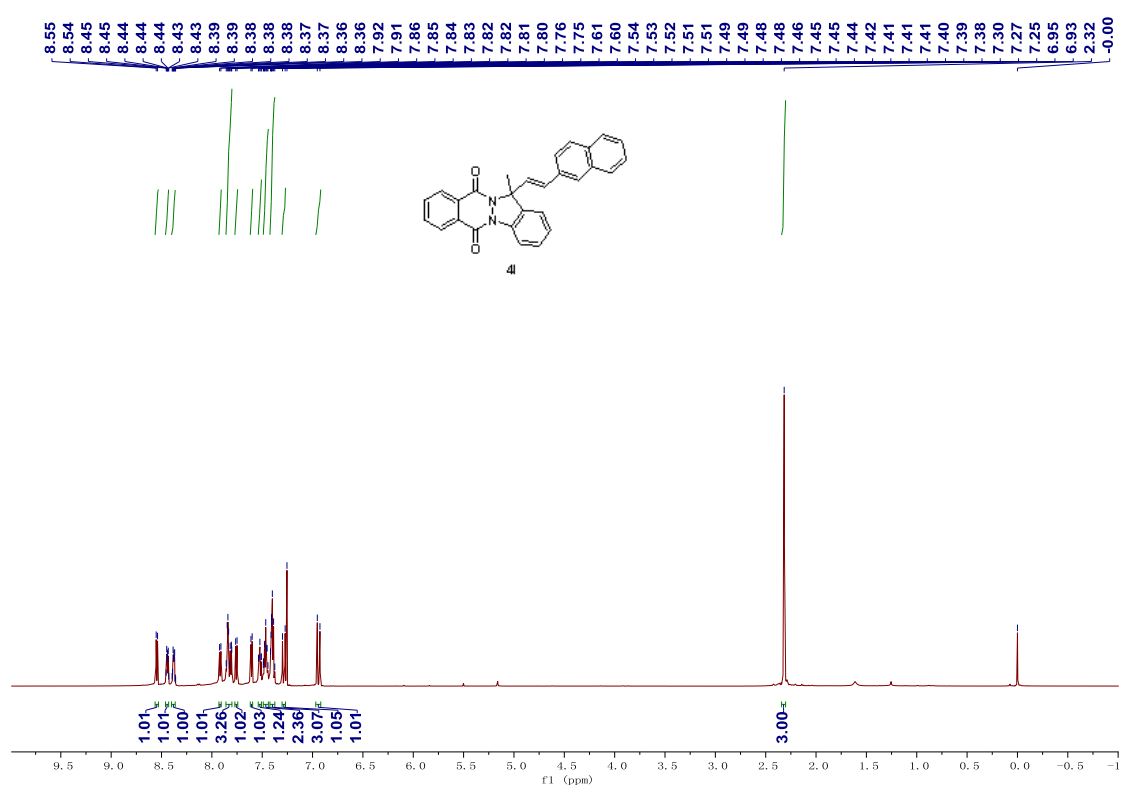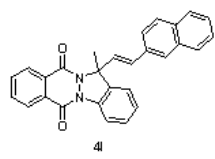

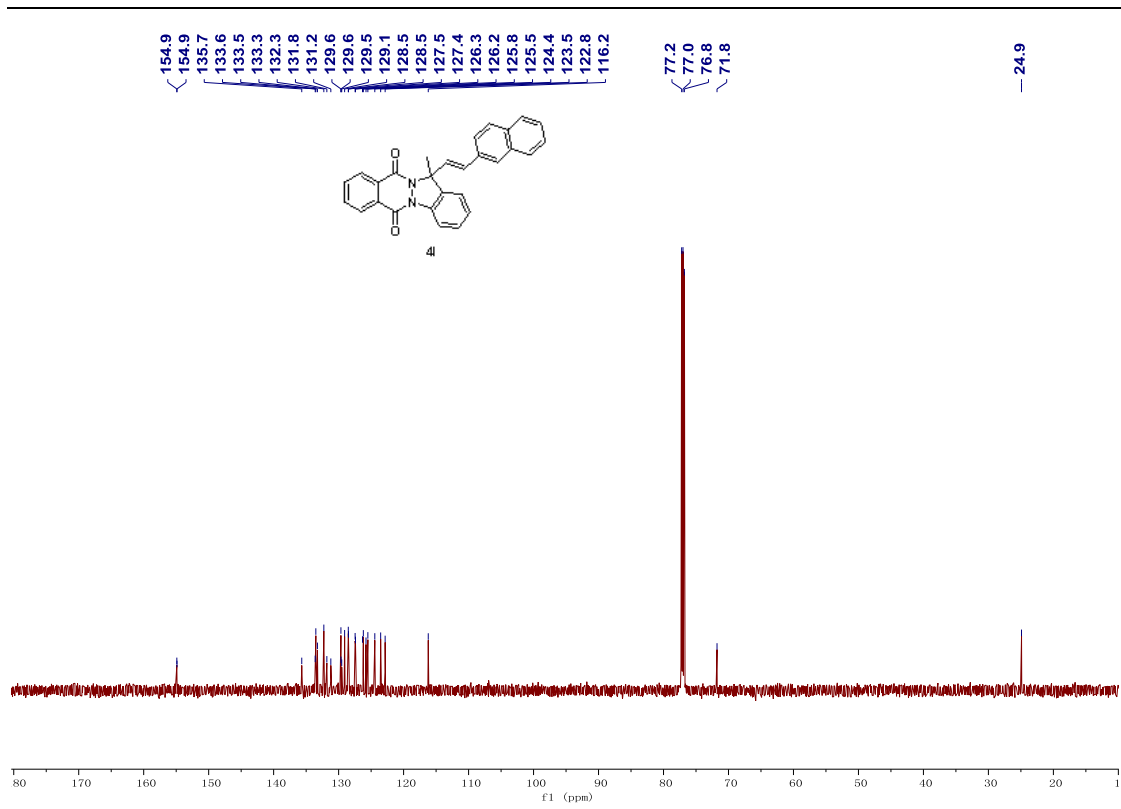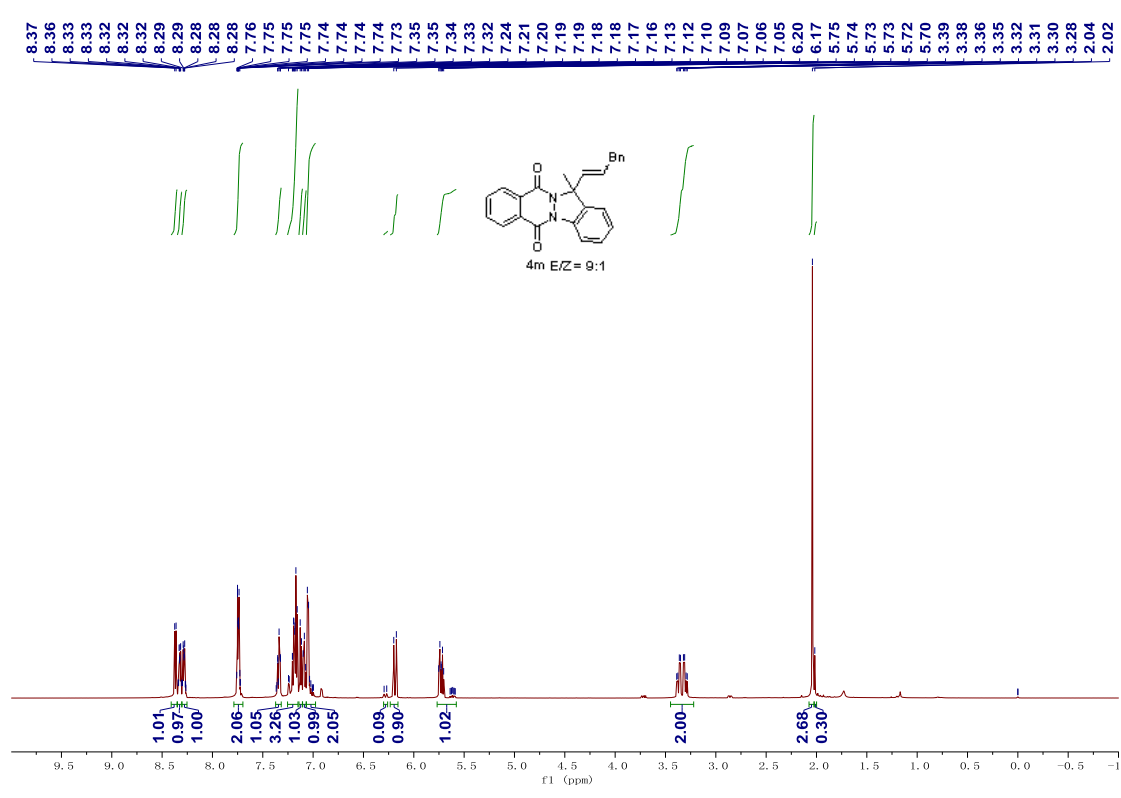

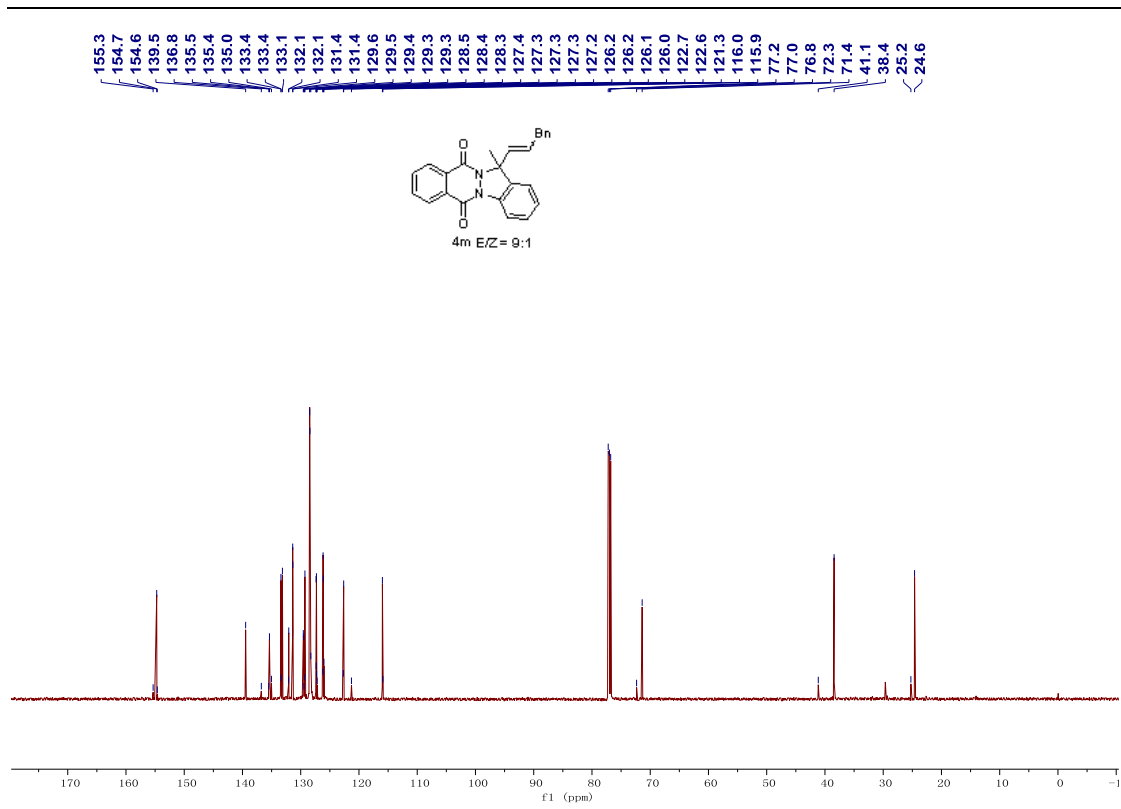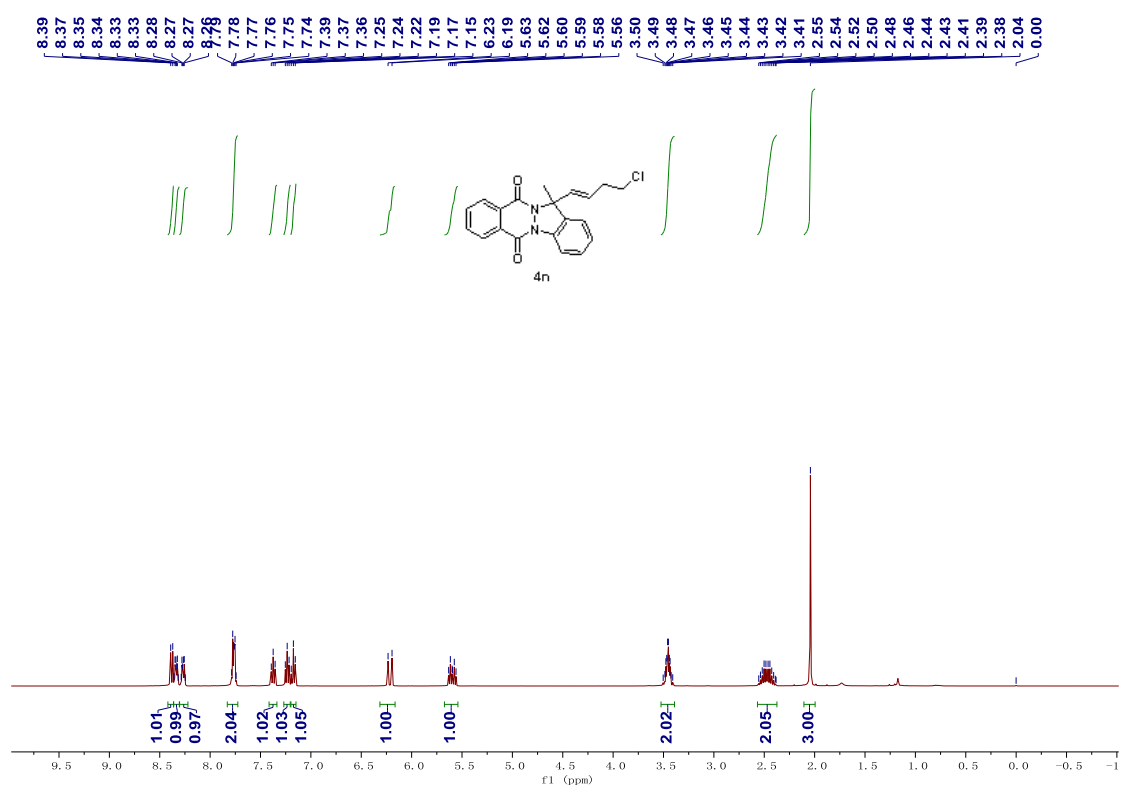

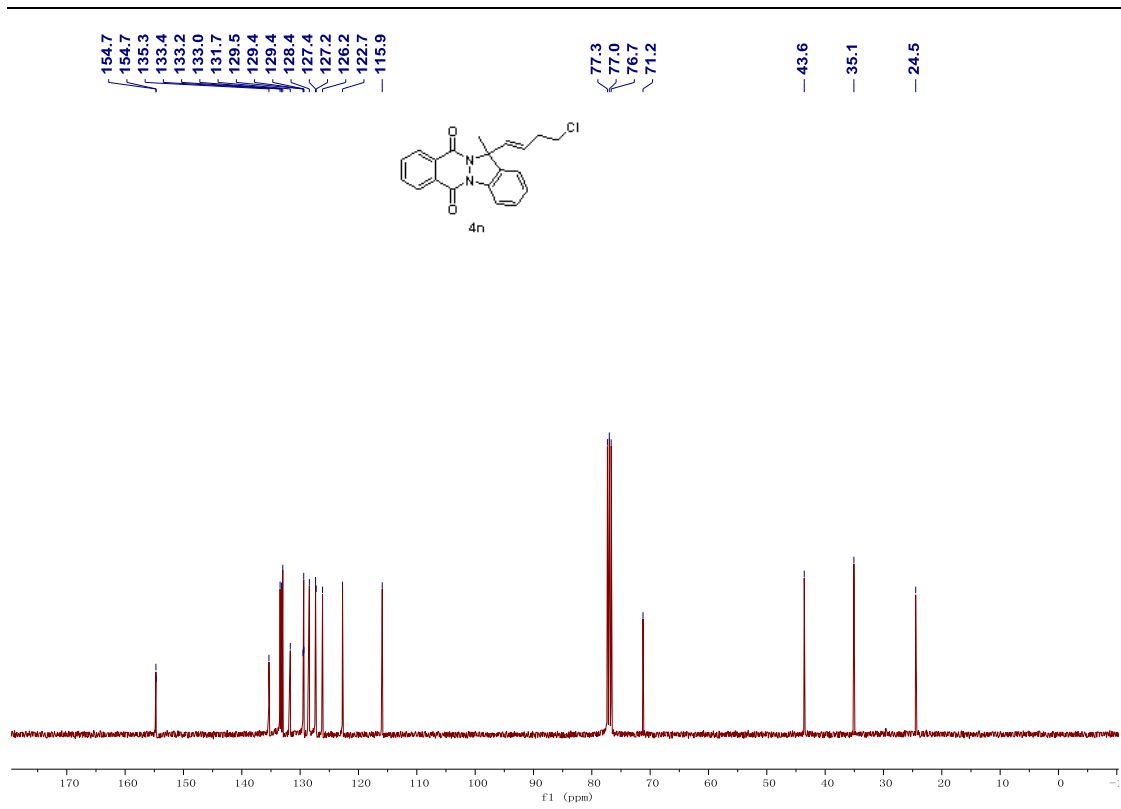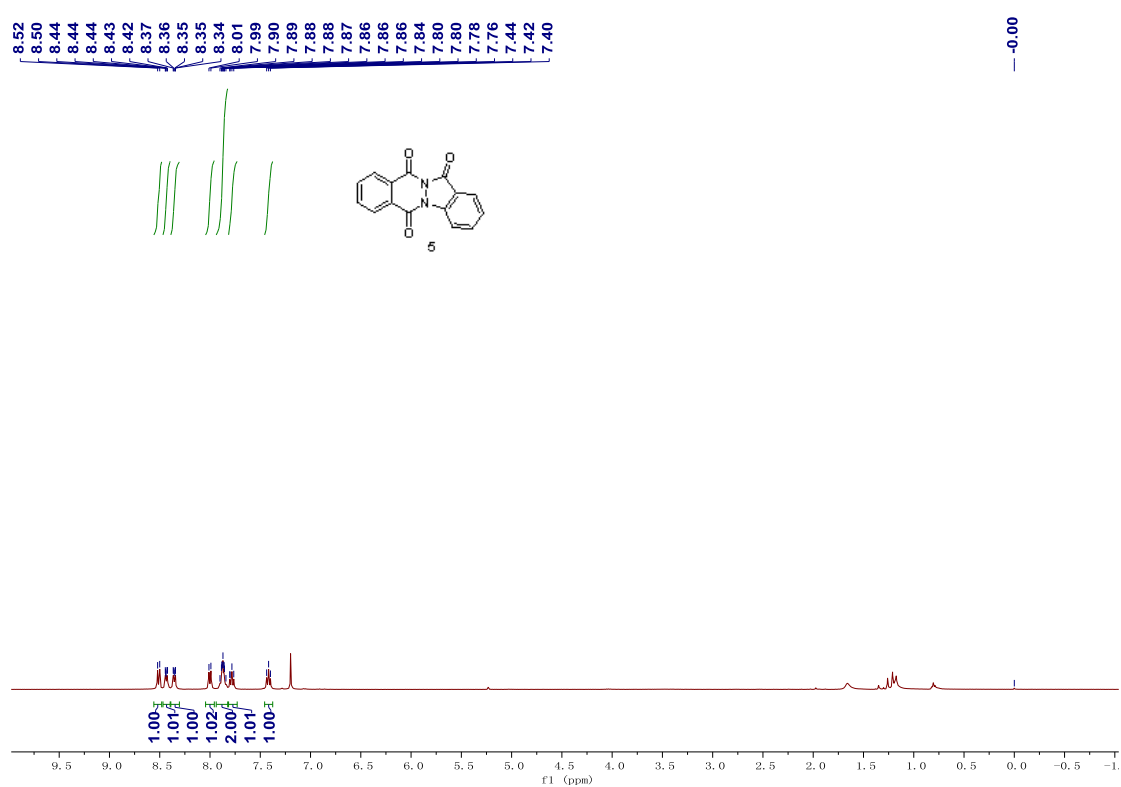



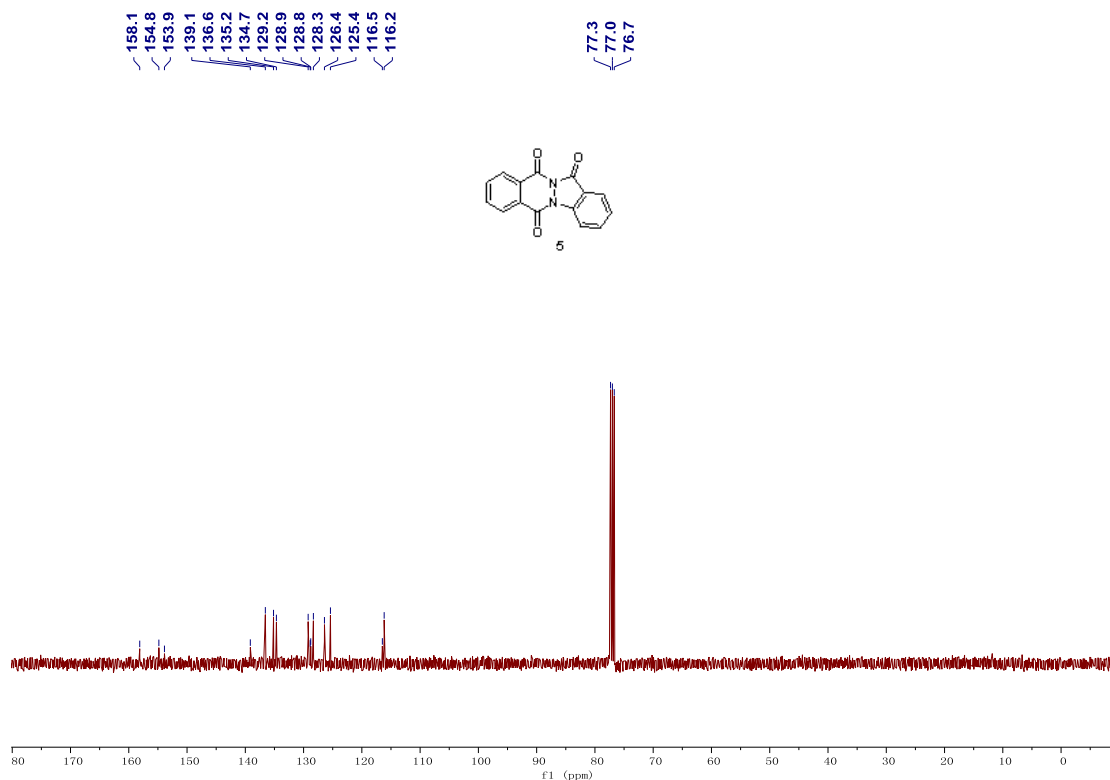

## 9. References

- (1) (a) P. Karishma, A. Gogia, S. K. Mandal and R. Sakhuja, *Adv. Synth. Catal.*, 2021, **363**, 762-775; (b) R. Prakash, B. R. Bora, R. C. Boruah and S. Gogoi, *Org. Lett.*, 2018, **20**, 2297-2300.
- (2) (a) S. -G. Wang and N. Cramer, *ACS Catal.*, 2020, **10**, 8231-8236; (b) R. Kuppasamy, R. Santhoshkumar, R. Boobalan, H. -R. Wu and C.-H. Cheng, *ACS Catal.*, 2018, **8**, 1880-1883.
- (3) (a) S. Chanthamath, H. W. Chua, S. Kimura, K. Shibatomi and S. Iwasa, *Org. Lett.*, 2014, **16**, 3408-3411; (b) J. Kuang and S. Ma, *J. Org. Chem.*, 2009, **74**, 1763-1765.
- (4) P. Garcia-Dominguez and C. Nevado, *J. Am. Chem. Soc.*, 2016, **138**, 3266-3269.
- (5) J. P. Schmidt and B. Breit, *Angew. Chem. Int. Ed.*, 2020, **59**, 23485-23490.
